# Supplementary material for: Arthropod and oligochaete assemblages from grasslands of the southern Kenai Peninsula, Alaska
Source: Biodivers Data J. 2017 Jan 12;(5):e10792. doi: 10.3897/BDJ.5.e10792 (PMC5345024; doi:10.3897/BDJ.5.e10792)
Supplement: Supplementary material 1 — Vegetation data [file bdj-05-e10792-s001.xlsx]

## Sheet: 2016-10-11-0823_veg_data
plot_id	country	state	latitude	longitude	coordinate_accuracy_m	specific_locality	Date	observer	scientific_name	GBIF ID	GBIF_ID
53F	United States	Alaska	59.9211	-151.246	15	3.3 km SSW of confluence of Deep Creek and Cytex Creek, grassland study site 53F	2015-07-19	John M. Morton	Achillea borealis Bong.	3120086	3120086
53F	United States	Alaska	59.9211	-151.246	15	3.3 km SSW of confluence of Deep Creek and Cytex Creek, grassland study site 53F	2015-07-19	John M. Morton	Aconitum delphiniifolium Hort.Prag. ex Steud.	7994520	7994520
53F	United States	Alaska	59.9211	-151.246	15	3.3 km SSW of confluence of Deep Creek and Cytex Creek, grassland study site 53F	2015-07-19	John M. Morton	Alopecurus magellanicus Lam.	4107552	4107552
53F	United States	Alaska	59.9211	-151.246	15	3.3 km SSW of confluence of Deep Creek and Cytex Creek, grassland study site 53F	2015-07-19	John M. Morton	Calamagrostis canadensis (Michx.) P.Beauv.	2704895	2704895
53F	United States	Alaska	59.9211	-151.246	15	3.3 km SSW of confluence of Deep Creek and Cytex Creek, grassland study site 53F	2015-07-19	John M. Morton	Carex macrochaeta C.A.Mey.	2723223	2723223
53F	United States	Alaska	59.9211	-151.246	15	3.3 km SSW of confluence of Deep Creek and Cytex Creek, grassland study site 53F	2015-07-19	John M. Morton	Castilleja unalaschcensis (Cham. & Schltdl.) Malte	3170721	3170721
53F	United States	Alaska	59.9211	-151.246	15	3.3 km SSW of confluence of Deep Creek and Cytex Creek, grassland study site 53F	2015-07-19	John M. Morton	Chamerion angustifolium (L.) J. Holub	3188783	3188783
53F	United States	Alaska	59.9211	-151.246	15	3.3 km SSW of confluence of Deep Creek and Cytex Creek, grassland study site 53F	2015-07-19	John M. Morton	Conioselinum chinense (L.) Britton, Sterns & Poggenb.	3034690	3034690
53F	United States	Alaska	59.9211	-151.246	15	3.3 km SSW of confluence of Deep Creek and Cytex Creek, grassland study site 53F	2015-07-19	John M. Morton	Festuca altaica Trin.	7720963	7720963
53F	United States	Alaska	59.9211	-151.246	15	3.3 km SSW of confluence of Deep Creek and Cytex Creek, grassland study site 53F	2015-07-19	John M. Morton	Galium L.	2913027	2913027
53F	United States	Alaska	59.9211	-151.246	15	3.3 km SSW of confluence of Deep Creek and Cytex Creek, grassland study site 53F	2015-07-19	John M. Morton	Geranium erianthum DC.	2890394	2890394
53F	United States	Alaska	59.9211	-151.246	15	3.3 km SSW of confluence of Deep Creek and Cytex Creek, grassland study site 53F	2015-07-19	John M. Morton	Heracleum maximum Bartr.	3034826	3034826
53F	United States	Alaska	59.9211	-151.246	15	3.3 km SSW of confluence of Deep Creek and Cytex Creek, grassland study site 53F	2015-07-19	John M. Morton	Lupinus nootkatensis Sims	2964525	2964525
53F	United States	Alaska	59.9211	-151.246	15	3.3 km SSW of confluence of Deep Creek and Cytex Creek, grassland study site 53F	2015-07-19	John M. Morton	Phleum alpinum L.	2706012	2706012
53F	United States	Alaska	59.9211	-151.246	15	3.3 km SSW of confluence of Deep Creek and Cytex Creek, grassland study site 53F	2015-07-19	John M. Morton	Polemonium acutiflorum Willd. ex Roem. & Schult.	2927866	2927866
53F	United States	Alaska	59.9211	-151.246	15	3.3 km SSW of confluence of Deep Creek and Cytex Creek, grassland study site 53F	2015-07-19	John M. Morton	Sanguisorba canadensis L.	3029411	3029411
53F	United States	Alaska	59.9211	-151.246	15	3.3 km SSW of confluence of Deep Creek and Cytex Creek, grassland study site 53F	2015-07-19	John M. Morton	Swertia perennis L.	5414540	5414540
53F	United States	Alaska	59.9211	-151.246	15	3.3 km SSW of confluence of Deep Creek and Cytex Creek, grassland study site 53F	2015-07-19	John M. Morton	Veratrum viride Aiton	7575112	7575112
54F	United States	Alaska	59.9435	-151.244	15	1.3 km WSW of confluence of Deep Creek and Cytex Creek, grassland study site 54F	2015-07-19	John M. Morton	Athyrium filix-femina (L.) Roth	5275044	5275044
54F	United States	Alaska	59.9435	-151.244	15	1.3 km WSW of confluence of Deep Creek and Cytex Creek, grassland study site 54F	2015-07-19	John M. Morton	Calamagrostis canadensis (Michx.) P.Beauv.	2704895	2704895
54F	United States	Alaska	59.9435	-151.244	15	1.3 km WSW of confluence of Deep Creek and Cytex Creek, grassland study site 54F	2015-07-19	John M. Morton	Chamerion angustifolium (L.) J. Holub	3188783	3188783
54F	United States	Alaska	59.9435	-151.244	15	1.3 km WSW of confluence of Deep Creek and Cytex Creek, grassland study site 54F	2015-07-19	John M. Morton	Dryopteris expansa (C. Presl) Fraser-Jenk. & Jermy	5275102	5275102
54F	United States	Alaska	59.9435	-151.244	15	1.3 km WSW of confluence of Deep Creek and Cytex Creek, grassland study site 54F	2015-07-19	John M. Morton	Equisetum L.	2687913	2687913
54F	United States	Alaska	59.9435	-151.244	15	1.3 km WSW of confluence of Deep Creek and Cytex Creek, grassland study site 54F	2015-07-19	John M. Morton	Rubus pedatus Sm.	2993074	2993074
54F	United States	Alaska	59.9435	-151.244	15	1.3 km WSW of confluence of Deep Creek and Cytex Creek, grassland study site 54F	2015-07-19	John M. Morton	Spiraea stevenii (Schneid.) Rydb.	3026628	3026628
54F	United States	Alaska	59.9435	-151.244	15	1.3 km WSW of confluence of Deep Creek and Cytex Creek, grassland study site 54F	2015-07-19	John M. Morton	Streptopus amplexifolius (L.) DC.	2752734	2752734
54F	United States	Alaska	59.9435	-151.244	15	1.3 km WSW of confluence of Deep Creek and Cytex Creek, grassland study site 54F	2015-07-19	John M. Morton	Trientalis europaea L.	3169295	3169295
55F	United States	Alaska	59.9658	-151.242	14	Kenai Peninsula, 2.3 km NW of confluence of Deep Creek and Cytex Creek. 2015 Grassland study site 55F	2015-07-19	John M. Morton	Calamagrostis canadensis (Michx.) P.Beauv.	2704895	2704895
55F	United States	Alaska	59.9658	-151.242	14	Kenai Peninsula, 2.3 km NW of confluence of Deep Creek and Cytex Creek. 2015 Grassland study site 55F	2015-07-19	John M. Morton	Castilleja unalaschcensis (Cham. & Schltdl.) Malte	3170721	3170721
55F	United States	Alaska	59.9658	-151.242	14	Kenai Peninsula, 2.3 km NW of confluence of Deep Creek and Cytex Creek. 2015 Grassland study site 55F	2015-07-19	John M. Morton	Chamerion angustifolium (L.) J. Holub	3188783	3188783
55F	United States	Alaska	59.9658	-151.242	14	Kenai Peninsula, 2.3 km NW of confluence of Deep Creek and Cytex Creek. 2015 Grassland study site 55F	2015-07-19	John M. Morton	Dryopteris expansa (C. Presl) Fraser-Jenk. & Jermy	5275102	5275102
55F	United States	Alaska	59.9658	-151.242	14	Kenai Peninsula, 2.3 km NW of confluence of Deep Creek and Cytex Creek. 2015 Grassland study site 55F	2015-07-19	John M. Morton	Equisetum L.	2687913	2687913
55F	United States	Alaska	59.9658	-151.242	14	Kenai Peninsula, 2.3 km NW of confluence of Deep Creek and Cytex Creek. 2015 Grassland study site 55F	2015-07-19	John M. Morton	Geranium erianthum DC.	2890394	2890394
55F	United States	Alaska	59.9658	-151.242	14	Kenai Peninsula, 2.3 km NW of confluence of Deep Creek and Cytex Creek. 2015 Grassland study site 55F	2015-07-19	John M. Morton	Lupinus nootkatensis Sims	2964525	2964525
55F	United States	Alaska	59.9658	-151.242	14	Kenai Peninsula, 2.3 km NW of confluence of Deep Creek and Cytex Creek. 2015 Grassland study site 55F	2015-07-19	John M. Morton	Sanguisorba canadensis L.	3029411	3029411
55F	United States	Alaska	59.9658	-151.242	14	Kenai Peninsula, 2.3 km NW of confluence of Deep Creek and Cytex Creek. 2015 Grassland study site 55F	2015-07-19	John M. Morton	Streptopus amplexifolius (L.) DC.	2752734	2752734
55F	United States	Alaska	59.9658	-151.242	14	Kenai Peninsula, 2.3 km NW of confluence of Deep Creek and Cytex Creek. 2015 Grassland study site 55F	2015-07-19	John M. Morton	Veratrum viride Aiton	7575112	7575112
59F	United States	Alaska	60.0596	-151.234	14	Kenai Peninsula, 8.5 km W of Trophy Lake. 2015 Grassland study site 59F	2015-07-18	John M. Morton	Alnus Mill.	2876099	2876099
59F	United States	Alaska	60.0596	-151.234	14	Kenai Peninsula, 8.5 km W of Trophy Lake. 2015 Grassland study site 59F	2015-07-18	John M. Morton	Athyrium filix-femina (L.) Roth	5275044	5275044
59F	United States	Alaska	60.0596	-151.234	14	Kenai Peninsula, 8.5 km W of Trophy Lake. 2015 Grassland study site 59F	2015-07-18	John M. Morton	Calamagrostis canadensis (Michx.) P.Beauv.	2704895	2704895
59F	United States	Alaska	60.0596	-151.234	14	Kenai Peninsula, 8.5 km W of Trophy Lake. 2015 Grassland study site 59F	2015-07-18	John M. Morton	Chamerion angustifolium (L.) J. Holub	3188783	3188783
59F	United States	Alaska	60.0596	-151.234	14	Kenai Peninsula, 8.5 km W of Trophy Lake. 2015 Grassland study site 59F	2015-07-18	John M. Morton	Dryopteris expansa (C. Presl) Fraser-Jenk. & Jermy	5275102	5275102
59F	United States	Alaska	60.0596	-151.234	14	Kenai Peninsula, 8.5 km W of Trophy Lake. 2015 Grassland study site 59F	2015-07-18	John M. Morton	Equisetum L.	2687913	2687913
59F	United States	Alaska	60.0596	-151.234	14	Kenai Peninsula, 8.5 km W of Trophy Lake. 2015 Grassland study site 59F	2015-07-18	John M. Morton	Geranium erianthum DC.	2890394	2890394
59F	United States	Alaska	60.0596	-151.234	14	Kenai Peninsula, 8.5 km W of Trophy Lake. 2015 Grassland study site 59F	2015-07-18	John M. Morton	Lupinus nootkatensis Sims	2964525	2964525
59F	United States	Alaska	60.0596	-151.234	14	Kenai Peninsula, 8.5 km W of Trophy Lake. 2015 Grassland study site 59F	2015-07-18	John M. Morton	Salix barclayi Anderss.	5372597	5372597
59F	United States	Alaska	60.0596	-151.234	14	Kenai Peninsula, 8.5 km W of Trophy Lake. 2015 Grassland study site 59F	2015-07-18	John M. Morton	Sanguisorba canadensis L.	3029411	3029411
59F	United States	Alaska	60.0596	-151.234	14	Kenai Peninsula, 8.5 km W of Trophy Lake. 2015 Grassland study site 59F	2015-07-18	John M. Morton	Streptopus amplexifolius (L.) DC.	2752734	2752734
59F	United States	Alaska	60.0596	-151.234	14	Kenai Peninsula, 8.5 km W of Trophy Lake. 2015 Grassland study site 59F	2015-07-18	John M. Morton	Veratrum viride Aiton	7575112	7575112
67F	United States	Alaska	59.9648	-151.193	14	Kenai Peninsula, 2.6 km NE of confluence of Deep Creek and Cytex Creek. 2015 Grassland study site 67F	2015-07-19	Matt Bowser	Achillea borealis Bong.	3120086	3120086
67F	United States	Alaska	59.9648	-151.193	14	Kenai Peninsula, 2.6 km NE of confluence of Deep Creek and Cytex Creek. 2015 Grassland study site 67F	2015-07-19	Matt Bowser	Aconitum delphiniifolium Hort.Prag. ex Steud.	7994520	7994520
67F	United States	Alaska	59.9648	-151.193	14	Kenai Peninsula, 2.6 km NE of confluence of Deep Creek and Cytex Creek. 2015 Grassland study site 67F	2015-07-19	Matt Bowser	Calamagrostis canadensis (Michx.) P.Beauv.	2704895	2704895
67F	United States	Alaska	59.9648	-151.193	14	Kenai Peninsula, 2.6 km NE of confluence of Deep Creek and Cytex Creek. 2015 Grassland study site 67F	2015-07-19	Matt Bowser	Castilleja unalaschcensis (Cham. & Schltdl.) Malte	3170721	3170721
67F	United States	Alaska	59.9648	-151.193	14	Kenai Peninsula, 2.6 km NE of confluence of Deep Creek and Cytex Creek. 2015 Grassland study site 67F	2015-07-19	Matt Bowser	Chamerion angustifolium (L.) J. Holub	3188783	3188783
67F	United States	Alaska	59.9648	-151.193	14	Kenai Peninsula, 2.6 km NE of confluence of Deep Creek and Cytex Creek. 2015 Grassland study site 67F	2015-07-19	Matt Bowser	Equisetum arvense L.	7924597	7924597
67F	United States	Alaska	59.9648	-151.193	14	Kenai Peninsula, 2.6 km NE of confluence of Deep Creek and Cytex Creek. 2015 Grassland study site 67F	2015-07-19	Matt Bowser	Equisetum sylvaticum L.	2687929	2687929
67F	United States	Alaska	59.9648	-151.193	14	Kenai Peninsula, 2.6 km NE of confluence of Deep Creek and Cytex Creek. 2015 Grassland study site 67F	2015-07-19	Matt Bowser	Gymnocarpium dryopteris (L.) Newm.	2650832	2650832
67F	United States	Alaska	59.9648	-151.193	14	Kenai Peninsula, 2.6 km NE of confluence of Deep Creek and Cytex Creek. 2015 Grassland study site 67F	2015-07-19	Matt Bowser	Lupinus nootkatensis Sims	2964525	2964525
67F	United States	Alaska	59.9648	-151.193	14	Kenai Peninsula, 2.6 km NE of confluence of Deep Creek and Cytex Creek. 2015 Grassland study site 67F	2015-07-19	Matt Bowser	Luzula parviflora (Ehrh.) Desv.	2700961	2700961
67F	United States	Alaska	59.9648	-151.193	14	Kenai Peninsula, 2.6 km NE of confluence of Deep Creek and Cytex Creek. 2015 Grassland study site 67F	2015-07-19	Matt Bowser	Moehringia lateriflora (L.) Fenzl	3085371	3085371
67F	United States	Alaska	59.9648	-151.193	14	Kenai Peninsula, 2.6 km NE of confluence of Deep Creek and Cytex Creek. 2015 Grassland study site 67F	2015-07-19	Matt Bowser	Picea lutzii Little	5284875	5284875
67F	United States	Alaska	59.9648	-151.193	14	Kenai Peninsula, 2.6 km NE of confluence of Deep Creek and Cytex Creek. 2015 Grassland study site 67F	2015-07-19	Matt Bowser	Poa arctica R.Br.	2704207	2704207
67F	United States	Alaska	59.9648	-151.193	14	Kenai Peninsula, 2.6 km NE of confluence of Deep Creek and Cytex Creek. 2015 Grassland study site 67F	2015-07-19	Matt Bowser	Populus tremuloides Michx.	3040215	3040215
67F	United States	Alaska	59.9648	-151.193	14	Kenai Peninsula, 2.6 km NE of confluence of Deep Creek and Cytex Creek. 2015 Grassland study site 67F	2015-07-19	Matt Bowser	Pyrola asarifolia Michx.	2888271	2888271
67F	United States	Alaska	59.9648	-151.193	14	Kenai Peninsula, 2.6 km NE of confluence of Deep Creek and Cytex Creek. 2015 Grassland study site 67F	2015-07-19	Matt Bowser	Rubus arcticus L.	2992051	2992051
67F	United States	Alaska	59.9648	-151.193	14	Kenai Peninsula, 2.6 km NE of confluence of Deep Creek and Cytex Creek. 2015 Grassland study site 67F	2015-07-19	Matt Bowser	Rubus pedatus Sm.	2993074	2993074
67F	United States	Alaska	59.9648	-151.193	14	Kenai Peninsula, 2.6 km NE of confluence of Deep Creek and Cytex Creek. 2015 Grassland study site 67F	2015-07-19	Matt Bowser	Sanguisorba canadensis L.	3029411	3029411
67F	United States	Alaska	59.9648	-151.193	14	Kenai Peninsula, 2.6 km NE of confluence of Deep Creek and Cytex Creek. 2015 Grassland study site 67F	2015-07-19	Matt Bowser	Spiraea stevenii (Schneid.) Rydb.	3026628	3026628
67F	United States	Alaska	59.9648	-151.193	14	Kenai Peninsula, 2.6 km NE of confluence of Deep Creek and Cytex Creek. 2015 Grassland study site 67F	2015-07-19	Matt Bowser	Streptopus amplexifolius (L.) DC.	2752734	2752734
67F	United States	Alaska	59.9648	-151.193	14	Kenai Peninsula, 2.6 km NE of confluence of Deep Creek and Cytex Creek. 2015 Grassland study site 67F	2015-07-19	Matt Bowser	Vaccinium caespitosum Michaux	2882860	2882860
67F	United States	Alaska	59.9648	-151.193	14	Kenai Peninsula, 2.6 km NE of confluence of Deep Creek and Cytex Creek. 2015 Grassland study site 67F	2015-07-19	Matt Bowser	Vaccinium vitis-idaea L.	2882835	2882835
67F	United States	Alaska	59.9648	-151.193	14	Kenai Peninsula, 2.6 km NE of confluence of Deep Creek and Cytex Creek. 2015 Grassland study site 67F	2015-07-19	Matt Bowser	Veratrum viride Aiton	7575112	7575112
67F	United States	Alaska	59.9648	-151.193	14	Kenai Peninsula, 2.6 km NE of confluence of Deep Creek and Cytex Creek. 2015 Grassland study site 67F	2015-07-19	Matt Bowser	Viola L.	2874237	2874237
70F	United States	Alaska	60.0362	-151.187	14	Kenai Peninsula, north of North Fork Deep Creek, NW corner of section 4. 2015 Grassland study site 70F	2015-07-19	John M. Morton	Achillea borealis Bong.	3120086	3120086
70F	United States	Alaska	60.0362	-151.187	14	Kenai Peninsula, north of North Fork Deep Creek, NW corner of section 4. 2015 Grassland study site 70F	2015-07-19	John M. Morton	Aconitum delphiniifolium Hort.Prag. ex Steud.	7994520	7994520
70F	United States	Alaska	60.0362	-151.187	14	Kenai Peninsula, north of North Fork Deep Creek, NW corner of section 4. 2015 Grassland study site 70F	2015-07-19	John M. Morton	Athyrium filix-femina (L.) Roth	5275044	5275044
70F	United States	Alaska	60.0362	-151.187	14	Kenai Peninsula, north of North Fork Deep Creek, NW corner of section 4. 2015 Grassland study site 70F	2015-07-19	John M. Morton	Calamagrostis canadensis (Michx.) P.Beauv.	2704895	2704895
70F	United States	Alaska	60.0362	-151.187	14	Kenai Peninsula, north of North Fork Deep Creek, NW corner of section 4. 2015 Grassland study site 70F	2015-07-19	John M. Morton	Carex mertensii J.D.Prescott ex Bong.	2722481	2722481
70F	United States	Alaska	60.0362	-151.187	14	Kenai Peninsula, north of North Fork Deep Creek, NW corner of section 4. 2015 Grassland study site 70F	2015-07-19	John M. Morton	Castilleja unalaschcensis (Cham. & Schltdl.) Malte	3170721	3170721
70F	United States	Alaska	60.0362	-151.187	14	Kenai Peninsula, north of North Fork Deep Creek, NW corner of section 4. 2015 Grassland study site 70F	2015-07-19	John M. Morton	Chamerion angustifolium (L.) J. Holub	3188783	3188783
70F	United States	Alaska	60.0362	-151.187	14	Kenai Peninsula, north of North Fork Deep Creek, NW corner of section 4. 2015 Grassland study site 70F	2015-07-19	John M. Morton	Dryopteris expansa (C. Presl) Fraser-Jenk. & Jermy	5275102	5275102
70F	United States	Alaska	60.0362	-151.187	14	Kenai Peninsula, north of North Fork Deep Creek, NW corner of section 4. 2015 Grassland study site 70F	2015-07-19	John M. Morton	Equisetum L.	2687913	2687913
70F	United States	Alaska	60.0362	-151.187	14	Kenai Peninsula, north of North Fork Deep Creek, NW corner of section 4. 2015 Grassland study site 70F	2015-07-19	John M. Morton	Galium L.	2913027	2913027
70F	United States	Alaska	60.0362	-151.187	14	Kenai Peninsula, north of North Fork Deep Creek, NW corner of section 4. 2015 Grassland study site 70F	2015-07-19	John M. Morton	Geranium erianthum DC.	2890394	2890394
70F	United States	Alaska	60.0362	-151.187	14	Kenai Peninsula, north of North Fork Deep Creek, NW corner of section 4. 2015 Grassland study site 70F	2015-07-19	John M. Morton	Heracleum maximum Bartr.	3034826	3034826
70F	United States	Alaska	60.0362	-151.187	14	Kenai Peninsula, north of North Fork Deep Creek, NW corner of section 4. 2015 Grassland study site 70F	2015-07-19	John M. Morton	Lupinus nootkatensis Sims	2964525	2964525
70F	United States	Alaska	60.0362	-151.187	14	Kenai Peninsula, north of North Fork Deep Creek, NW corner of section 4. 2015 Grassland study site 70F	2015-07-19	John M. Morton	Luzula parviflora (Ehrh.) Desv.	2700961	2700961
70F	United States	Alaska	60.0362	-151.187	14	Kenai Peninsula, north of North Fork Deep Creek, NW corner of section 4. 2015 Grassland study site 70F	2015-07-19	John M. Morton	Salix L.	3039576	3039576
70F	United States	Alaska	60.0362	-151.187	14	Kenai Peninsula, north of North Fork Deep Creek, NW corner of section 4. 2015 Grassland study site 70F	2015-07-19	John M. Morton	Sanguisorba canadensis L.	3029411	3029411
70F	United States	Alaska	60.0362	-151.187	14	Kenai Peninsula, north of North Fork Deep Creek, NW corner of section 4. 2015 Grassland study site 70F	2015-07-19	John M. Morton	Senecio triangularis Hook.	3108906	3108906
70F	United States	Alaska	60.0362	-151.187	14	Kenai Peninsula, north of North Fork Deep Creek, NW corner of section 4. 2015 Grassland study site 70F	2015-07-19	John M. Morton	Streptopus amplexifolius (L.) DC.	2752734	2752734
70F	United States	Alaska	60.0362	-151.187	14	Kenai Peninsula, north of North Fork Deep Creek, NW corner of section 4. 2015 Grassland study site 70F	2015-07-19	John M. Morton	Swertia perennis L.	5414540	5414540
70F	United States	Alaska	60.0362	-151.187	14	Kenai Peninsula, north of North Fork Deep Creek, NW corner of section 4. 2015 Grassland study site 70F	2015-07-19	John M. Morton	Veratrum viride Aiton	7575112	7575112
71F	United States	Alaska	60.0586	-151.185	13	north of North Fork Deep Creek, grassland study site 71F	2015-07-18	Matt Bowser	Calamagrostis canadensis (Michx.) P.Beauv.	2704895	2704895
71F	United States	Alaska	60.0586	-151.185	13	north of North Fork Deep Creek, grassland study site 71F	2015-07-18	Matt Bowser	Chamerion angustifolium (L.) J. Holub	3188783	3188783
71F	United States	Alaska	60.0586	-151.185	13	north of North Fork Deep Creek, grassland study site 71F	2015-07-18	Matt Bowser	Equisetum arvense L.	7924597	7924597
71F	United States	Alaska	60.0586	-151.185	13	north of North Fork Deep Creek, grassland study site 71F	2015-07-18	Matt Bowser	Streptopus amplexifolius (L.) DC.	2752734	2752734
71F	United States	Alaska	60.0586	-151.185	13	north of North Fork Deep Creek, grassland study site 71F	2015-07-18	Matt Bowser	Veratrum viride Aiton	7575112	7575112
73F	United States	Alaska	60.1055	-151.181	14	Kenai Peninsula, 7.7 km WSW of North Kolomin Lake. 2015 Grassland study site 73F	2015-07-18	John M. Morton	Aconitum delphiniifolium Hort.Prag. ex Steud.	7994520	7994520
73F	United States	Alaska	60.1055	-151.181	14	Kenai Peninsula, 7.7 km WSW of North Kolomin Lake. 2015 Grassland study site 73F	2015-07-18	John M. Morton	Athyrium filix-femina (L.) Roth	5275044	5275044
73F	United States	Alaska	60.1055	-151.181	14	Kenai Peninsula, 7.7 km WSW of North Kolomin Lake. 2015 Grassland study site 73F	2015-07-18	John M. Morton	Calamagrostis canadensis (Michx.) P.Beauv.	2704895	2704895
73F	United States	Alaska	60.1055	-151.181	14	Kenai Peninsula, 7.7 km WSW of North Kolomin Lake. 2015 Grassland study site 73F	2015-07-18	John M. Morton	Chamerion angustifolium (L.) J. Holub	3188783	3188783
73F	United States	Alaska	60.1055	-151.181	14	Kenai Peninsula, 7.7 km WSW of North Kolomin Lake. 2015 Grassland study site 73F	2015-07-18	John M. Morton	Dryopteris expansa (C. Presl) Fraser-Jenk. & Jermy	5275102	5275102
73F	United States	Alaska	60.1055	-151.181	14	Kenai Peninsula, 7.7 km WSW of North Kolomin Lake. 2015 Grassland study site 73F	2015-07-18	John M. Morton	Equisetum L.	2687913	2687913
73F	United States	Alaska	60.1055	-151.181	14	Kenai Peninsula, 7.7 km WSW of North Kolomin Lake. 2015 Grassland study site 73F	2015-07-18	John M. Morton	Geranium erianthum DC.	2890394	2890394
73F	United States	Alaska	60.1055	-151.181	14	Kenai Peninsula, 7.7 km WSW of North Kolomin Lake. 2015 Grassland study site 73F	2015-07-18	John M. Morton	Heracleum maximum Bartr.	3034826	3034826
73F	United States	Alaska	60.1055	-151.181	14	Kenai Peninsula, 7.7 km WSW of North Kolomin Lake. 2015 Grassland study site 73F	2015-07-18	John M. Morton	Lupinus nootkatensis Sims	2964525	2964525
73F	United States	Alaska	60.1055	-151.181	14	Kenai Peninsula, 7.7 km WSW of North Kolomin Lake. 2015 Grassland study site 73F	2015-07-18	John M. Morton	Pyrola asarifolia Michx.	2888271	2888271
73F	United States	Alaska	60.1055	-151.181	14	Kenai Peninsula, 7.7 km WSW of North Kolomin Lake. 2015 Grassland study site 73F	2015-07-18	John M. Morton	Rubus L.	2988638	2988638
73F	United States	Alaska	60.1055	-151.181	14	Kenai Peninsula, 7.7 km WSW of North Kolomin Lake. 2015 Grassland study site 73F	2015-07-18	John M. Morton	Salix L.	3039576	3039576
73F	United States	Alaska	60.1055	-151.181	14	Kenai Peninsula, 7.7 km WSW of North Kolomin Lake. 2015 Grassland study site 73F	2015-07-18	John M. Morton	Sambucus racemosa L.	2888723	2888723
73F	United States	Alaska	60.1055	-151.181	14	Kenai Peninsula, 7.7 km WSW of North Kolomin Lake. 2015 Grassland study site 73F	2015-07-18	John M. Morton	Sanguisorba canadensis L.	3029411	3029411
73F	United States	Alaska	60.1055	-151.181	14	Kenai Peninsula, 7.7 km WSW of North Kolomin Lake. 2015 Grassland study site 73F	2015-07-18	John M. Morton	Streptopus amplexifolius (L.) DC.	2752734	2752734
73F	United States	Alaska	60.1055	-151.181	14	Kenai Peninsula, 7.7 km WSW of North Kolomin Lake. 2015 Grassland study site 73F	2015-07-18	John M. Morton	Veratrum viride Aiton	7575112	7575112
84F	United States	Alaska	60.0822	-151.137	14	Kenai Peninsula, 7.4 km SW of Kolomin Lake. 2015 Grassland study site 84F	2015-07-18	Matt Bowser	Athyrium filix-femina (L.) Roth	5275044	5275044
84F	United States	Alaska	60.0822	-151.137	14	Kenai Peninsula, 7.4 km SW of Kolomin Lake. 2015 Grassland study site 84F	2015-07-18	Matt Bowser	Calamagrostis canadensis (Michx.) P.Beauv.	2704895	2704895
84F	United States	Alaska	60.0822	-151.137	14	Kenai Peninsula, 7.4 km SW of Kolomin Lake. 2015 Grassland study site 84F	2015-07-18	Matt Bowser	Chamerion angustifolium (L.) J. Holub	3188783	3188783
84F	United States	Alaska	60.0822	-151.137	14	Kenai Peninsula, 7.4 km SW of Kolomin Lake. 2015 Grassland study site 84F	2015-07-18	Matt Bowser	Dryopteris expansa (C. Presl) Fraser-Jenk. & Jermy	5275102	5275102
84F	United States	Alaska	60.0822	-151.137	14	Kenai Peninsula, 7.4 km SW of Kolomin Lake. 2015 Grassland study site 84F	2015-07-18	Matt Bowser	Equisetum arvense L.	7924597	7924597
84F	United States	Alaska	60.0822	-151.137	14	Kenai Peninsula, 7.4 km SW of Kolomin Lake. 2015 Grassland study site 84F	2015-07-18	Matt Bowser	Geranium erianthum DC.	2890394	2890394
84F	United States	Alaska	60.0822	-151.137	14	Kenai Peninsula, 7.4 km SW of Kolomin Lake. 2015 Grassland study site 84F	2015-07-18	Matt Bowser	Sanguisorba canadensis L.	3029411	3029411
84F	United States	Alaska	60.0822	-151.137	14	Kenai Peninsula, 7.4 km SW of Kolomin Lake. 2015 Grassland study site 84F	2015-07-18	Matt Bowser	Streptopus amplexifolius (L.) DC.	2752734	2752734
85F	United States	Alaska	60.1045	-151.136	15	5.5 km SW of North Kolomin Lake, grassland study site 85F	2015-07-18	Matt Bowser	Calamagrostis canadensis (Michx.) P.Beauv.	2704895	2704895
85F	United States	Alaska	60.1045	-151.136	15	5.5 km SW of North Kolomin Lake, grassland study site 85F	2015-07-18	Matt Bowser	Carex mertensii J.D.Prescott ex Bong.	2722481	2722481
85F	United States	Alaska	60.1045	-151.136	15	5.5 km SW of North Kolomin Lake, grassland study site 85F	2015-07-18	Matt Bowser	Chamerion angustifolium (L.) J. Holub	3188783	3188783
85F	United States	Alaska	60.1045	-151.136	15	5.5 km SW of North Kolomin Lake, grassland study site 85F	2015-07-18	Matt Bowser	Equisetum arvense L.	7924597	7924597
85F	United States	Alaska	60.1045	-151.136	15	5.5 km SW of North Kolomin Lake, grassland study site 85F	2015-07-18	Matt Bowser	Equisetum sylvaticum L.	2687929	2687929
85F	United States	Alaska	60.1045	-151.136	15	5.5 km SW of North Kolomin Lake, grassland study site 85F	2015-07-18	Matt Bowser	Rubus idaeus L.	2993094	2993094
85F	United States	Alaska	60.1045	-151.136	15	5.5 km SW of North Kolomin Lake, grassland study site 85F	2015-07-18	Matt Bowser	Sambucus racemosa L.	2888723	2888723
85F	United States	Alaska	60.1045	-151.136	15	5.5 km SW of North Kolomin Lake, grassland study site 85F	2015-07-18	Matt Bowser	Streptopus amplexifolius (L.) DC.	2752734	2752734
