# Supplementary material for: Arthropod and oligochaete assemblages from grasslands of the southern Kenai Peninsula, Alaska
Source: Biodivers Data J. 2017 Jan 12;(5):e10792. doi: 10.3897/BDJ.5.e10792 (PMC5345024; doi:10.3897/BDJ.5.e10792)
Supplement: Supplementary material 2 — Earthworm specimen data [file bdj-05-e10792-s002.xlsx]

## Sheet: ArctosData_CD11478313
GUID	GUID	BOLD_processid	BOLD_processid	scientific_name	collectors	coordinate_accuracy_m	country	state	specific_locality	date	latitude	longitude
KNWR:Ento:10822	KNWR:Ento:10822	MOBIL1272-16	MOBIL1272-16	Enchytraeidae sp. BOLD:ADC0663	Matt Bowser	15	United States	Alaska	5.5 km SW of North Kolomin Lake, grassland study site 85F	2015-07-18	60.1045	-151.136
KNWR:Ento:10820	KNWR:Ento:10820			Dendrobaena octaedra	Mallory Okuly	15	United States	Alaska	1.3 km WSW of confluence of Deep Creek and Cytex Creek, grassland study site 54F	2015-07-19	59.9435	-151.244
KNWR:Ento:10785	KNWR:Ento:10785			Dendrobaena octaedra	Matt Bowser, Dawn Magness	13	United States	Alaska	north of North Fork Deep Creek, grassland study site 71F	2015-07-18	60.0586	-151.185
KNWR:Ento:10821	KNWR:Ento:10821			Dendrobaena octaedra	Mallory Okuly	15	United States	Alaska	3.3 km SSW of confluence of Deep Creek and Cytex Creek, grassland study site 53F	2015-07-19	59.9211	-151.246
