# Supplementary material for: Arthropod and oligochaete assemblages from grasslands of the southern Kenai Peninsula, Alaska
Source: Biodivers Data J. 2017 Jan 12;(5):e10792. doi: 10.3897/BDJ.5.e10792 (PMC5345024; doi:10.3897/BDJ.5.e10792)
Supplement: Supplementary material 3 — Arthropod sight identification occurrences [file bdj-05-e10792-s003.xlsx]

## Sheet: 2016-05-26-1220_sight_ID_table
class	order	family	genus	species	KNWR:Ento:10838	KNWR:Ento:10839	KNWR:Ento:10840	KNWR:Ento:10841	KNWR:Ento:10842	KNWR:Ento:10843	KNWR:Ento:10844	KNWR:Ento:10845	KNWR:Ento:10846	KNWR:Ento:10847
Arachnida	Acari				0	0	0	0	0	0	0	0	1	0
Arachnida	Araneae				0	0	1	0	0	0	0	0	0	1
Arachnida	Araneae	Tetragnathidae	Tetragnatha		0	1	0	0	0	0	0	0	1	0
Arachnida	Araneae	Thomisidae	Misumena	Misumena vatia	0	0	0	0	0	0	0	1	0	0
Insecta	Coleoptera				0	0	2	0	0	0	0	4	0	0
Insecta	Coleoptera	Elateridae			1	0	0	0	0	0	0	0	0	0
Insecta	Coleoptera	Staphylinidae			0	1	1	0	0	0	0	0	0	0
Insecta	Diptera				17	22	11	6	12	8	1	16	33	9
Insecta	Diptera	Agromyzidae			0	1	0	0	0	1	0	0	0	0
Insecta	Diptera	Bibionidae			0	0	0	0	0	0	1	0	0	0
Insecta	Diptera	Chironomidae			2	3	1	0	9	1	1	2	3	1
Insecta	Diptera	Culicidae			0	0	0	0	1	0	0	1	1	0
Insecta	Diptera	Empididae			4	2	2	1	2	0	4	12	17	1
Insecta	Diptera	Ephydridae			1	0	0	0	0	0	0	0	0	0
Insecta	Diptera	Lauxaniidae	Lauxania	Lauxania shewelli	3	0	1	0	1	3	0	0	4	2
Insecta	Diptera	Phoridae			0	1	1	1	9	1	3	1	11	2
Insecta	Diptera	Pipunculidae			0	0	1	0	0	0	0	1	0	0
Insecta	Diptera	Rhagionidae	Symphoromyia		0	1	2	1	0	0	0	0	1	0
Insecta	Diptera	Scathophagidae			0	0	0	1	0	0	0	1	1	1
Insecta	Diptera	Simuliidae			0	0	0	0	0	5	0	1	7	0
Insecta	Diptera	Sphaeroceridae			0	1	0	0	0	0	0	0	1	0
Insecta	Diptera	Syrphidae			0	1	0	0	0	0	0	0	0	0
Insecta	Hemiptera				11	24	32	28	8	20	4	29	60	22
Insecta	Hemiptera	Aphididae			5	1	5	3	8	2	0	8	5	2
Insecta	Hemiptera	Cicadellidae			19	20	44	8	9	5	6	21	120	5
Insecta	Hemiptera	Miridae			10	2	1	1	0	3	1	1	9	1
Insecta	Hemiptera	Miridae	Irbisia		0	0	0	0	0	0	0	0	28	0
Insecta	Hemiptera	Nabidae	Nabis		0	1	3	0	0	0	1	0	4	0
Insecta	Hemiptera	Psyllidae			3	4	4	8	21	5	0	20	11	4
Insecta	Hymenoptera				11	3	2	2	3	2	0	2	2	0
Insecta	Hymenoptera	Ichneumonidae			3	0	0	1	2	2	0	0	1	0
Insecta	Hymenoptera	Sphecidae			0	2	0	0	0	0	0	0	0	0
Insecta	Hymenoptera	Tenthredinidae			2	0	0	0	0	2	0	2	0	0
Insecta	Hymenoptera	Torymidae	Torymus		0	0	0	0	0	0	0	0	2	0
Insecta	Lepidoptera				0	0	0	0	0	0	0	0	2	1
Insecta	Psocoptera				4	0	0	0	0	0	0	0	0	0
