# Supplementary material for: Arthropod and oligochaete assemblages from grasslands of the southern Kenai Peninsula, Alaska
Source: Biodivers Data J. 2017 Jan 12;(5):e10792. doi: 10.3897/BDJ.5.e10792 (PMC5345024; doi:10.3897/BDJ.5.e10792)
Supplement: Supplementary material 4 — Cluster identification data from metagenomic analysis [file bdj-05-e10792-s004.xlsx]

## Sheet: 2016-07-11-1024_cluster_sequenc
GUID	GUID	cluster label	read count	process id	process id	similarity	class	order	family	genus	species	BIN	BIN	province	nucleotides
KNWR:Ento:10838	KNWR:Ento:10838	M02696:121:000000000-AP85G:1:1109:23535:11731 1:N:0:219	4149	UAMIC423-13	UAMIC423-13	98.8	Insecta	Coleoptera	Elateridae	Hypnoidus	Hypnoidus bicolor	BOLD:AAH2367	BOLD:AAH2367	Alaska	GGTACTGGATGAACAGTATATCCCCCCTTTATCAGCCAACATCGCCCACAGAGGATCATCTGTTGACTTAGCAATTTTTAGATTACATCTAGCTGGTATCTCATCTATCCTAGGAGCAGTAAATTTTATTTCAACTGTAATCAATATACGATCAACGGGAATCAACTTTGATCGTATACCATTATTTGTTTGAGCTGTAGCAATTACTGCACTTCTACTACTTATTTCACTTCCAGTCCTGGCAGGAGCAATCACTATACTACTGACAGACCGAAACTTAAACACATCATTTTTTGATCCTGCTGGTGGGGGAGACCCAATTCTATATCAACACTTATTTTGATTTTTTGGTCACCCTGAAGTTTA
KNWR:Ento:10838	KNWR:Ento:10838	M02696:121:000000000-AP85G:1:2109:9208:3656 1:N:0:219	4	KNWRA103-14	KNWRA103-14	98.8	Insecta	Diptera	Anthomyiidae	Delia	Delia echinata	BOLD:ACT6183	BOLD:ACT6183	Alaska	GGTACTGGATGAACTGTTTATCCCCCCATTATCTAATAATATCGCTCATAATGGAGCTTCTGTTGATTTAGCAATTTTTTCTCTACATTTAGCTGGAATTTCATCAATTTTAGGTGCTGTAAATTTTATCACAACTGTAATTAATATACGATCTAAAGGAATCACTTTTGACCGTATACCATTATTTGTAAGATCAGTAGTAATTACAGCTTTACTTCTCTTATTATCTTTACCTGTTTTAGCAGGTGCTATTACTATATTATTAACTGATCGAAACTTAAATACATCATTTTTTGACCCAGCAGGAGGAGGGGATCCAATTTTATATCAACACTTATTTTGATTTTTTGGTCACCCTGAAGTTTA
KNWR:Ento:10838	KNWR:Ento:10838	M02696:121:000000000-AP85G:1:1108:12405:13161 1:N:0:219	10	BBDCN953-10	BBDCN953-10	98.8	Insecta	Diptera	Anthomyzidae	Anthomyza	Anthomyza sp. BOLD:AAL8100	BOLD:AAL8100	BOLD:AAL8100	British Columbia	GGTACAGGTTGAACTGTTTATCCTCCTTTATCATCAGTAATTGCTCATGGAGGACCTTCTGTAGATTTAGCTATTTTTTCTCTTCATTTAGCAGGAATTTCCTCAATTTTAGGTGCTGTAAATTTTATTACAACTGTAATTAATATACGAGCTACTGGAATTACCTTTGACCGAATACCATTATTTGTTTGATCTGTAGTAATTACTGCATTTTTACTATTACTATCTTTACCTGTATTAGCAGGAGCTATTACTATACTTTTAACAGATCGTAATTTGAATACTTCTTTTTTTGATCCTGCTGGTGGAGGAGACCCTATTCTTTACCAACACTTATTTTGATTTTTTGGTCACCCTGAAGTTTA
KNWR:Ento:10838	KNWR:Ento:10838	M02696:121:000000000-AP85G:1:2101:20233:22406 1:N:0:219	43	CNKLH1923-15	CNKLH1923-15	90.7	Insecta	Diptera	Chloropidae	Chloropidae gen. undet.	Chloropidae sp. BOLD:AAH4161	BOLD:AAH4161	BOLD:AAH4161	Yukon Territory	GGAACTGGATGAACTGTATACCCCCCTTTATCATCTATTATTGCTCATGGAGGAGCTTCAGTTGATTTAGCAATTTTTTCTTTACATTTAGCAGGAGTTTCTTCAATTTTAGGAGCTGTAAATTTCATTACAACAGTAATTAATATACGATCAACAGGAATTACATTTGATCGAATACCTTTATTTGTTTGATCAGTAGTAATTACTGCATTATTATTACTACTTATTTCACTTCCAGTCCTGGCAGGAGCAATCACTATACTACTGACAGACCGAAACTTAAACACATCATTTTTTGATCCTGCTGGTGGGGGAGACCCAATTCTATATCAACACTTATTTTGATTTTTTGTCACCCTGAAGTTTA
KNWR:Ento:10838	KNWR:Ento:10838	M02696:121:000000000-AP85G:1:2110:20929:9459 1:N:0:219	11	CNKLH1923-15	CNKLH1923-15	90.6	Insecta	Diptera	Chloropidae	Chloropidae gen. undet.	Chloropidae sp. BOLD:AAH4161	BOLD:AAH4161	BOLD:AAH4161	Yukon Territory	GGTACTGGTTGAACTGTTTATCCTCCTCTTTCAAGTAACATTGCCCATTCAGGAGCGAGAGTAGATTTATCTATCTTCTCTCTGCACTTGGCAGGAATTTCTTCAATTTTAGGAGCTGTAAATTTCATTACAACAGTAATTAATATACGATCAACAGGAATTACATTTGATCGAATACCTTTATTTGTTTGATCAGTAGTAATTACTGCATTATTATTACTACTTTCATTACCAGTATTAGCTGGAGCTATTACTATATTATTAACAGATCGAAATTTAAACACTTCATTCTTTGATCCAGCAGGAGGGGGAGATCCAATTTTATACCAACATTTATTTTGATTTTTTGGTCACCCTGAAGTTTA
KNWR:Ento:10838	KNWR:Ento:10838	M02696:121:000000000-AP85G:1:1117:12198:21971 1:N:0:219	1291	BBDCP123-10	BBDCP123-10	95.6	Insecta	Diptera	Fanniidae	Fannia	Fannia aethiops	BOLD:AAM6399	BOLD:AAM6399	British Columbia	GGTACTGGTTGAACAGTTTATCCTCCCACTATCATCTAACATCGCTCACGGAGGAGCATCCGTAGATCTAGCTATTTTTTCTTTACATTTAGCTGGAATTTCATCAATTTTAGGAGCTGTGAATTTTATCACAACTGTAATTAATATACGAGCTACAGGAATTACATTTGACCGAATACCTTTATTTGTTTGATCTGTAGTAATTACAGCATTATTATTACTTTTATCTTTACCTGTATTAGCCGGAGCTATTACTATATTATTAACAGATCGAAATATAAATACATCCTTTTTTGACCCTGCAGGAGGAGGAGATCCTATTTTATATCAACATTTATTTTGATTTTTTGGTCACCCTGAAGTTTA
KNWR:Ento:10838	KNWR:Ento:10838	M02696:121:000000000-AP85G:1:1106:24439:7749 1:N:0:219	160	DKNWR024-11	DKNWR024-11	98.8	Insecta	Diptera	Lauxaniidae	Lauxania	Lauxania shewelli	BOLD:AAH3531	BOLD:AAH3531	Alaska	GGTACTGGTTGAACTGTTTATCCCCCCGCTATCTTCTGGAATCGCCCATGGAGGTGCCTCAGTTGACTTAGCAATTTTTAGACTTCATTTAGCCGGAGTATCTTCAATTTTAGGGGCCGTAAATTTTATTACTACTGTAATCAATATACGATCTACTGGAATTACTTTCGACCGAATACCTTTATTTGTATGATCAGTAGTAATTACAGCTCTTTTATTACTTTTATCTCTACCCGTATTAGCTGGAGCCATTACAATATTACTAACTGATCGAAATTTAAACACCTCATTCTTTGACCCAGCTGGAGGAGGAGACCCTATTCTTTATCAACATTTATTTTGATTTTTTGGTCACCCTGAAGTTTA
KNWR:Ento:10838	KNWR:Ento:10838	M02696:121:000000000-AP85G:1:1108:8006:9062 1:N:0:219	9	MFAI008-11	MFAI008-11	98.5	Insecta	Diptera	Muscidae	Coenosia	Coenosia impunctata	BOLD:AAQ0758	BOLD:AAQ0758	Alaska	GGAACTGGATGAACTGTATACCCTCCTTTATCATCTAATATTGCTCATGGAGGAGCTTCTGTAGATTTAGCTATTTTTTCACTTCATTTAGCTGGAATTTCTTCTATTCTAGGAGCTGTAAATTTTATTACTACTGTAATTAATATACGATCAACAGGAATTACATTTGATCGAATACCTTTATTTGTTTGATCTGTAGTTATTACAGCTTTATTATTATTATTATCATTACCCGTATTAGCTGGAGCAATTACAATATTATTAACAGATCGAAACTTAAATACTTCTTTTTTTGACCCTGCAGGAGGAGGAGATCCAATTTTATACCAACATTTATTTTGATTTTTTGGTCACCCTGAAGTTTA
KNWR:Ento:10838	KNWR:Ento:10838	M02696:121:000000000-AP85G:1:1103:23206:20815 1:N:0:219	1	CNKTG2345-15	CNKTG2345-15	95.3	Insecta	Diptera	Phoridae	Phoridae gen. undet.	Phoridae sp. BOLD:AAG3234	BOLD:AAG3234	BOLD:AAG3234	British Columbia	GGTACTGGATGAACTGTTACCCTCCTCTTTCATCAAGAATTGCTCATAGTGGAGCTTCAGTTGATTTAGCAATTTTCTCACTTCATCTAGCTGGAATTTCTTCAATTTTAGGTTCTGTAAATTTCATTACTACTATTATTAATATACGTTCATCAGGAATCACTTTTGATCGAATACCTTTATTTGTATGATCAGTAGGAATTACTGCTTTATTACTTTTACTTTCACTTCCTGTTTTAGCAGGTGCTATTACTATACTTTTAACTGATCGAAACTTTAATACTTCTTTCTTTGATCCTGCAGGAGGGGGAGATCCTATTTTATATCAACATTTATTCTGATTTTTTGGTCACCCTGAAGTTTA
KNWR:Ento:10838	KNWR:Ento:10838	M02696:121:000000000-AP85G:1:1107:16276:10544 1:N:0:219	16	CNGLC421-13	CNGLC421-13	94.6	Insecta	Diptera	Sciaridae	Sciaridae gen. undet.	Sciaridae sp. BOLD:AAH3999	BOLD:AAH3999	BOLD:AAH3999	British Columbia	GGTACAGGTTGAACAGTTCACCCTCCTCTATCTTCAACTTTATCCCACTCAGGCGCTTCAGTTGATTTATCAATCTTTTCTCTTCATTTAGCTGGTATTTCTTCAATTTTAGGAGCTGTAAATTTTATTTCCACTATTATTAATATACGAGCCCCCGGAATATTATTCGATAAAATACCTTTATTTGTATGATCTGTATTAATTACAGCTATTCTACTCCTACTTTCATTACCAGTTTTAGCCGGAGCTATCACTATACTTCTAACAGATCGAAATTTGAACACTTCTTTCTTTGACCCGGCTGGAGGAGGAGACCCGATCTTATATCAACACTTATTTTGATTTTTTGGTCACCCTGAAGTTTA
KNWR:Ento:10838	KNWR:Ento:10838	M02696:121:000000000-AP85G:1:1110:6431:18473 1:N:0:219	246	BBDCN497-10	BBDCN497-10	91.8	Insecta	Diptera	Sepsidae	Sepsis	Sepsis neocynipsea	BOLD:ABY4960	BOLD:ABY4960	British Columbia	GGTACTGGTTGAACAGTTTATCCCCCCTCTTTCAAGTAACATTGCCCATTCAGGAGCGAGAGTAGATTTATCTATCTTCTCTCTCCATTTAGCAGGAATTTCTTCTATTTTAGGAGCTGTAAATTTTATTACAACAGTTATTAATATACGATCTACAGGAATTACATTTGATCGAATACCTTTATTTGTATGAGCTGTTGTTATTACTGCACTTCTTTTACTTTTATCATTACCTGTTTTAGCAGGAGCAATTACAATATTATTAACTGATCGAAATTTAAATACCTCATTTTTTGACCCTGCTGGAGGTGGTGACCCAATTCTTTACCAACATTTATTTTGATTTTTTGGTCACCCTGAAGTTTA
KNWR:Ento:10838	KNWR:Ento:10838	M02696:121:000000000-AP85G:1:1102:18541:12591 1:N:0:219	14	BBDCN497-10	BBDCN497-10	93.2	Insecta	Diptera	Sepsidae	Sepsis	Sepsis neocynipsea	BOLD:ABY4960	BOLD:ABY4960	British Columbia	GGTACAGGATGAACAGTTTACCCTCCTTTTATCTTCAGGTATTGCTCATGGAAGAGCTTCAGTTGATGTAGCAATTTTTTCTCTACATTTAGCAGGAATTTCTTCTATTTTAGGGGCTGTAAATTTTATCACAACAATTATAATTATACGATCTACAGGAATTACATTTGATCGAATACCTTTATTTGTATGAGCTGTTGTTATTACTGCACACCTTTTACTTTTATCACTACCTCTTTTAGCAGGAGCTATTACAATACTATTAACTGATCTAAATTTGAATACCTCATTTTTTGACCCTGCTGGAGGTGGAGACACAATTCTTTATCAACAATTATTTTGATTTTTTGGTCACCCTGAAGTTTA
KNWR:Ento:10838	KNWR:Ento:10838	M02696:121:000000000-AP85G:1:1102:26209:7726 1:N:0:219	41	UAMIC625-13	UAMIC625-13	96.2	Insecta	Hemiptera	Cicadellidae	Empoasca	Empoasca luda	BOLD:AAG8683	BOLD:AAG8683	Alaska	GGAACTGGTTGAACAGTTTATCCCCCCTCTTTCATCTAATATTACTCATTCTGGTTCTAGTGTTGATTTAGCTATTTTTTCATTACATTTAGCTGGTATTTCCTCAATTTTAGGAGCTGTAAATTTTATTACGACTGTGATTAATATGCGTTCTAATGGAATAACTTTTGATAAGATTCCTCTATTTGTGTGATCAGTTTTTATTACAGCTATTTTGTTGTTACTTTCCTTACCCGTATTAGCAGGAGCTATTACTATATTATTAACAGATCGAAATTTAAATACATCATTTTTTAATCCCTCAGGTGGTGGGGATCCAATTTTATATCAACACTTATTTTGATTTTTTGGTCACCCTGAAGTTTA
KNWR:Ento:10838	KNWR:Ento:10838	M02696:121:000000000-AP85G:1:2105:8390:14804 1:N:0:219	26	NGNAF686-13	NGNAF686-13	90	Insecta	Hemiptera	Cicadellidae	Euscelis	Euscelis aemulans	BOLD:ABA5839	BOLD:ABA5839	British Columbia	GGAACTGGTTGAACTGTTTATCCCCCTCTTTCAAATAACATTGCCCATTCAGGAGCAAGAGTAGATTTATCTATCTTCTCTCTACACTTAGCTGGAATGTCTTCAATTTTAGGTGCAGTAAATTTCACTTCCACTGTAATAAATATACGAACATCAGGAACATTATTAGACCGAACTCCTCTATTTGTATGGTCAGTTCTTATTACTGCAATTCTATTATTACTATCACTACCAGTATTAGCTGGGGCGATTACTATACTTCTTACAGATCGAAATATCAACACAACATTCTTCGACCCTGCAGGTGGGGGTGACCCAATTCTATACCAACATTTATTTTGATTTTTTGGTCACCCTGAAGTTTA
KNWR:Ento:10838	KNWR:Ento:10838	M02696:121:000000000-AP85G:1:1103:27763:8437 1:N:0:219	27831	CNCHF2119-12	CNCHF2119-12	93.1	Insecta	Hemiptera	Cicadellidae	Euscelis	Euscelis monodens sp. nov	BOLD:ACG7815	BOLD:ACG7815	Yukon Territory	GGTACAGGATGAACAGTTTACCCCCCCTTTCAAGTAACATTGCCCATTCAGGAGCAAGAGTAGATTTATCTATCTTCTCTCTTCTCTCTACACTTAGCGGGAATTTCTTCAATTTTAGGTGCAGTAAATTTCATTTCAACTGTAATAAATATACGAACATCAGGAATACTGATAGACCGCACTCCTCTTTTTGTGTGATCAGTTCTTATTACTGCAATTCTTTTACTTCTGTCATTACCGGTATTGGCTGGAGCCATCACCATACTCCTTACTGACCGAAATATAAACACAACATTTTTTGACCCTGCAGGTGGGGGTGACCCAATTCTCTATCAACATTTATTTTGATTTTTTGGTCACCCTGAAGTTTA
KNWR:Ento:10838	KNWR:Ento:10838	M02696:121:000000000-AP85G:1:1101:16097:5959 1:N:0:219	6608	CNCHF2119-12	CNCHF2119-12	92.3	Insecta	Hemiptera	Cicadellidae	Euscelis	Euscelis monodens sp. nov	BOLD:ACG7815	BOLD:ACG7815	Yukon Territory	GGAACTGGATGAACTGTTTACCCCCCTCTTTCAAGTAACATTGCCCATTCAGGAGCGAGAGTAGATTTATCTATCTTCTCTCTGCACTTGGCAGGAATTTCTTCAATTTTAGGTGCAGTAAATTTCATTTCAACTGTAATAAATATACGAACGTCAGGGATACTCTTAGACCGCACTTCCCTTTTTGTGTGATCAGTTCTTATTACTGCAATTCTACTACTTCTGTCATTACCGGTATTGGCTGGAGCCATTCCCCATATTCTTTCCGAACCGAATTTTAACACCAACTTTTTTTAACCTGGAGGGGGGGGTGACCCAATTCTCTATCAACATTTATTTTGATTTTTTGGTCACCCTGAAGTTTA
KNWR:Ento:10838	KNWR:Ento:10838	M02696:121:000000000-AP85G:1:1112:14257:4480 1:N:0:219	48	CNCHF2119-12	CNCHF2119-12	91.7	Insecta	Hemiptera	Cicadellidae	Euscelis	Euscelis monodens sp. nov	BOLD:ACG7815	BOLD:ACG7815	Yukon Territory	GGTACTGGATGAACAATATATCCCCCTCTTTCAAGTAACATTGCCCATTCAGGAGCGAGAGTAGATTTATCTATCTTCTCTCTGCACTTGGCAGGAATTTCTTCAATTTTAGGTGCAGTAAATTTCATTTCAACTGTAATAAATATACGAACGTCAGGGATACTCTTAGACCGCACTCCCCTTTTTGTGTGATCAGTTCTTATTACTGCAATTCTACTACTTCTGTCATTACCGGTATTGGCTGGAGCCATCACCATGCTACTGAGTGATAGGAATATTAATACAACTTTCTTCGACTCTGCTGGTGGGGGGGACCCTATCTTATACCAACATTTGTTTTGATGTTGTGGTCACCCTGAAGTTTA
KNWR:Ento:10838	KNWR:Ento:10838	M02696:121:000000000-AP85G:1:1117:15949:14519 1:N:0:219	17	CNCHF2119-12	CNCHF2119-12	90.6	Insecta	Hemiptera	Cicadellidae	Euscelis	Euscelis monodens sp. nov	BOLD:ACG7815	BOLD:ACG7815	Yukon Territory	GGAACTGGATGAACTGTATATCCCCCTCTTTCAAGTAACATTGCCCATTCAGGAGCGAGAGTAGATTTATCTATCTTCTCTCTGCACTTGGCAGGAATTTCCTCAATTTTAGGTGCAGTAAATTTCATTTCAACTGTAATAAATATACGAACGTCAGGGATACTCTTAGACCGCACTCCCCTTTTTGTGTGATCAGTTCTTATTACTGCAATTCTACTACTTCTGTCATTACCAGTTTTAGCCGGAGCTATTACTATACTTTTAACAGACCGAAATTTGAACACTTCTTTCTTTGACCCAGCCGGAGGGGGAGACCCAATCTTATATCAACACTTATTTTGATTTTTTGGTCACCCTGAAGTTTA
KNWR:Ento:10838	KNWR:Ento:10838	M02696:121:000000000-AP85G:1:2108:20606:24062 1:N:0:219	3	CNCHF2119-12	CNCHF2119-12	92.6	Insecta	Hemiptera	Cicadellidae	Euscelis	Euscelis monodens sp. nov	BOLD:ACG7815	BOLD:ACG7815	Yukon Territory	GGAACAGGTTGAACAGTTTACCCCCCTCTTTCAAGTAACATTGCCCATTCAGGAGCGAGAGTAGATTTATCTATCTTCTCTCTGCACTTGGCAGGAATTTCTTCAATTTTAGGTGCAGTAAATTTCATTTCAACTGTAATCAATATACGAACGTCAGGGATACTCTTAGACCGCACTCTCCTATTTGTGTTATCAGCTCTGACTACTGCAATTCTACTACTTCTGTCATTACCGGTATTGGCTGGAGCCATCACCATACTCCTTACTGACCTAAATATAAATACATCCTTTTTTGCCCCTGCATGAGGAGGAGATCCTATATTATATCAACATTTATTGTGATTGTTTGGTCACCCTTAAGTTTA
KNWR:Ento:10838	KNWR:Ento:10838	M02696:121:000000000-AP85G:1:1105:26460:4692 1:N:0:219	2	CNCHF2119-12	CNCHF2119-12	90.6	Insecta	Hemiptera	Cicadellidae	Euscelis	Euscelis monodens sp. nov	BOLD:ACG7815	BOLD:ACG7815	Yukon Territory	GGTACTGGTTGAACTGTATATCCTCCTCTTTCAAGTAACATTGCCCATTCAGGAGCGAGAGTAGATTTATCTATCTTCTCTCTGCACTTGGCAGGAATTTCTTCAATGTTAGGGGCAGTAAATTTCAGGTCAACTGTAATAAATATACGAACGTCAGGGATACTCTTAGACCGCACTCCCCTTTTTGTGTGATCGTTTCTTATTACTGCAATTCTACTACTTCTGTCGTTACCGGTATTGGCTGGAGCCATCCCCCTCCTCCTTGCTTACCGAAATATAACCACCCCATTTTTTGCCTCTGCCTGTGGGCGTGACCCCCTTTTCTATCTACATTTCTTTTGATTTTTTGGTCACCCTGAAGTTTA
KNWR:Ento:10838	KNWR:Ento:10838	M02696:121:000000000-AP85G:1:2116:5747:9426 1:N:0:219	1	CNCHF2119-12	CNCHF2119-12	90.6	Insecta	Hemiptera	Cicadellidae	Euscelis	Euscelis monodens sp. nov	BOLD:ACG7815	BOLD:ACG7815	Yukon Territory	GGTACAGGATGAACTGTATATCCTCCTCTTTCATGAAACATTGCCCATTCAGGAGCGTGAGTAGATTTAGCTATCTTCTCCCTGCACTTGGCAGGAATTTCTTCAATTTTAGGTGCAGTTAATTTCATTACAACTATAATAAATATACGAACGTCAGGAGTTCTCTTTGACCGCATTCCCCTTTTTGTTTGATCTGTACTTATTACTGCAATTCTACTACTTCTGTCATTACCTGTATTGGCTGGAGCCATCACCATACTCCTAACAGATCGAAATATAAATACATCATTTTTTGACCCTGCAGGTGGAGGAGACCCTATTCTCTATCAACATTTATTTTGATTTTTTGGTCACCCTGAAGTTTA
KNWR:Ento:10838	KNWR:Ento:10838	M02696:121:000000000-AP85G:1:1101:22088:19239 1:N:0:219	38	CNCHG1367-12	CNCHG1367-12	91.7	Insecta	Hemiptera	Cicadellidae	Idiocerus	Idiocerus sp. BOLD:ACB0208	BOLD:ACB0208	BOLD:ACB0208	Newfoundland and Labrador	GGTACTGGATGAACAGTTTACCCCCCTCTATCTTCAGTCATTGCTCATGGTGGAGCTTCAGTAGATTTAGCTATTTTCTCATTACACCTGGCTGGTATTTCTTCTATTTTAGGAGCTGTAAATTTTATTACTACAGTAATTAACATACGATCTTCAGGAATAACTTTTGATCAAACTCCATTATTTGTATGGTCAGTTTTAATTACAGCGGTTTTATTACTACTTTCATTACCAGTATTAGCTGGTGCTATTACTATATTATTAACTGATCGTAATATTAATACTTCTTTCTTTGACCCTTCAGGTGGGGGAGATCCTATTTTGTATCAACATTTATTTTGATTTTTTGGTCACCCTGAAGTTTA
KNWR:Ento:10838	KNWR:Ento:10838	M02696:121:000000000-AP85G:1:1101:18296:17195 1:N:0:219	25	CNCHG1367-12	CNCHG1367-12	95	Insecta	Hemiptera	Cicadellidae	Idiocerus	Idiocerus sp. BOLD:ACB0208	BOLD:ACB0208	BOLD:ACB0208	Newfoundland and Labrador	GGTACTGGATGAACTGTTTATCCCCCTCTTTCTTCTAATGTTGCTCATTCTGGTCCTAGAGTTGATTTAGCAATTTTTTCTTTACATTTAGCAGGTATCTCTTCTATCCTAGGGGCAGTAAATTTTATCACTACAGTGATTAACATACGATCTTCAGGAATAACTTTTGACCAAACTCCATTATTTGTATGGTCAGTTCTAATTACAGCGGTTTTATTATTACTTTCATTACCAGTATTAGCTGGTGCTATTACTATATTGCTAACTGATCGTAATATTAATACTTCTTTCTTTGACCCTTCAGGTGGTGGGGACCCTATTTTATACCAACATTTATTTTGATTTTTTGGTCACCCTGAAGTTTA
KNWR:Ento:10838	KNWR:Ento:10838	M02696:121:000000000-AP85G:1:1114:18990:6398 1:N:0:219	139	BBHCN628-10	BBHCN628-10	93.8	Insecta	Hemiptera	Cicadellidae	Limotettix	Limotettix dasidus	BOLD:AAG8684	BOLD:AAG8684	British Columbia	GGAACTGGATGAACAGTTTATCCCCCTTTGTCAAGAAATATTGCTCATTCAGGACCTAGAGTGGACTTATCTATTTTTTCACTTCATTTAGCAGGAATTTCCTCAATCCTAGGAGCAATTAATTTTATTACAACAATTATAAATATACGTCCTATAGGTATATCTATAGAACGAACCCCTTTATTTGTATGGTCAGTATTAATCACAGCAATTCTTTTATTAATTTCACTTCCAGTTCTTGCAGGAGCAATTACAATATTATTAACAGATCGTAATATTAATACTACATTTTTTGACCCAGCAGGAGGGGGGGGACCCTATCTTGTATCAACATTTGTTTTGATTTTTTGGTCACCCTGAAGTTTA
KNWR:Ento:10838	KNWR:Ento:10838	M02696:121:000000000-AP85G:1:2116:11467:5324 1:N:0:219	245	BBHCN362-10	BBHCN362-10	95.9	Insecta	Hemiptera	Cicadellidae	Sonronius	Sonronius dahlbomi	BOLD:AAN8426	BOLD:AAN8426	British Columbia	GGTACAGGATGAACTGTATACCCCCCCTCTCTCTGGAAATATTGCTCATGCAGGTCCTAGTGTTGACATATCAATTTTTTCACTACACTTAGCAGGGGTTTCTTCTATCTTAGGAGCAGTAAATTTTATTACAACTGTAATAAATATACGACCTAGAGGTATAACCTTAGACCGAACCCCATTACTTGTATGATCTGTTTTAATTACTGCAGTCCTATTATTACTATCACTCCCAGTACTTGCTGGGGCAATCACCATACTACTCACTGATCGGAATATTAATACAACTTTCTTCGACCCAGCTGGTGGTGGGGACCCTATCTTATACCAACATTTGTTTTGATTTTTTGGTCACCCTGAAGTTTA
KNWR:Ento:10838	KNWR:Ento:10838	M02696:121:000000000-AP85G:1:1102:9154:14207 1:N:0:219	4	UAMIC2024-14	UAMIC2024-14	98.2	Insecta	Hemiptera	Miridae	Lygocoris	Lygocoris rugicollis	BOLD:ABU7216	BOLD:ABU7216	Alaska	GGTACAGGATGAACTGTATACCCCCCTCTATCAGCAAACATCTCCCATAACGGAGCCTCAGTAGACCTAGCAATCTTCTCACTTCACCTAGCAGGTGTGAGATCCATCTTAGGTGCAGTAAACTTCATTTCAACAATTATCAATATACGACCTATAGGAATAAACGCAGAGCGTATTCCACTATTTGTATGATCAGTGGCTATTACTGCTCTACTATTACTTTTATCATTACCAGTACTAGCTGGTGCTATCACTATACTACTAACAGATCGAAACTTCAATACATCATTTTTTGACCCTGCAGGAGGGGGGGATCCAATTCTATATCAGCACCTATTTTGATTTTTTGGTCACCCTGAAGTTTA
KNWR:Ento:10838	KNWR:Ento:10838	M02696:121:000000000-AP85G:1:2107:19603:12094 1:N:0:219	327	CNCHA1661-11	CNCHA1661-11	98.5	Insecta	Hemiptera	Miridae	Mecomma	Mecomma gilvipes	BOLD:AAZ6451	BOLD:AAZ6451	Alaska	GGTACTGGATGAACAGTTTATCCCCCCCCTTTCAGGAAATATATCCCACAATGGAAGATGTGTAGATATAGCAATTTTCTCACTCCATCTAGCCGGAATTTCATCTATTTTAGGAGCAGTAAATTTTATTTCAACAATCTTGAACATACGATCAACAGGTATAACTTTAGAGCAAATCCCATTATTTGTTTGATCTGTAGGAATTACAGCTCTACTTTTATTATTATCGCTACCTGTCCTAGCAGGGGCTATCACCATATTATTAACAGATCGAAACTTCAACACATCTTTCTTTGACCCTGCAGGAGGGGGAGATCCCATCCTTTATCAACATTTATTTTGATTTTTTGGTCACCCTGAAGTTTA
KNWR:Ento:10838	KNWR:Ento:10838	M02696:121:000000000-AP85G:1:1101:21122:7650 1:N:0:219	23	UAMIC2091-14	UAMIC2091-14	97.4	Insecta	Hemiptera	Miridae	Salignus	Salignus tahoensis	BOLD:AAF9947	BOLD:AAF9947	Alaska	GGTACTGGATGAACAGTATACCCTCCCATTATCAGCAAATATTTCACATAATGGGGCATCTGTTGATCTAGCAATTTTCTCATTACATTTAGCTGGTGTTTCATCTATTTTAGGGGCAGTAAATTTTATTTCAACAATTATTAATATGCGACCAGAAGGAATAAATGCTGAACGTATTCCATTATTTGTATGGTCAGTAGGAATTACTGCCCTATTATTATTATTATCATTACCAGTATTAGCTGGTGCTATAACAATATTATTAACAGCTCGAAATTTTAATACAGCATTTTTTGACCCGGCAGGAGGGGGAGACCCTATTCTATATAAACATTTACTTTGATTTTTTGGTCACCCTGAAGTTTA
KNWR:Ento:10838	KNWR:Ento:10838	M02696:121:000000000-AP85G:1:1119:15880:24831 1:N:0:219	10	UAMIC1935-14	UAMIC1935-14	98.5	Insecta	Hemiptera	Psyllidae	Craspedolepta	Craspedolepta alaskensis	BOLD:ACM1279	BOLD:ACM1279	Alaska	GGTACAGGTTGAACTGTATACCCCCCACTTTCTAATAGTTCTTTCCATAGAGGATACTCAATTGATATAGCAATTTTTTCACTTCACCTGGCAGGAATTTCTTCTATCCTTGGAGCAATCAACTTTATTACAACAATTTTAAATATACGATCTTCATTGTGTGATTTAGAAAAGATACCCTTGTTTGTTTGATCAGTATTAATTACTGCATTTCTTCTCCTTTTAGCCCTTCCAGTACTAGCTGGAGCAATCACTATACTTTTAACTGACCGAAATTTTAATACTTCTTTTTTTGATCCTAGAGGTGGGGGAGACCCTATTTTATACCAACATTTATTCTGATTTTTTGGTCACCCTAAAGTTTTA
KNWR:Ento:10838	KNWR:Ento:10838	M02696:121:000000000-AP85G:1:2119:26830:15113 1:N:0:219	1	SSPRA359-15	SSPRA359-15	93.1	Insecta	Psocoptera	Caeciliusidae	Valenzuela	Valenzuela flavidus	BOLD:AAH3228	BOLD:AAH3228	British Columbia	GGTACAGGATGAACAGTATACCCCCCTTTATCAAGTGCTATTGCACACACAGGTGCCT
KNWR:Ento:10838	KNWR:Ento:10838	M02696:121:000000000-AP85G:1:1101:16241:17692 1:N:0:219	79	BBHCN985-10	BBHCN985-10	97.9	Insecta	Psocoptera	Caeciliusidae	Valenzuela	Valenzuela flavidus	BOLD:AAN8447	BOLD:AAN8447	British Columbia	GGTACAGGTTGAACTGTTTATCCCCCTTTATCAAGTGCTATTGCACATACAGGTGCTTCTGTAGACCTTGCAATCTTTTCCCTACATTTGGCTGGTATTAGATCTATTTTAGGAGCAGTTAACTTCATTACAACTATTATTAATATACGATCTAAAAGATTAACATTAGAACGAATACCTTTATTTGTTTGATCCGTGTTTATCACCGCAATCTTACTTCTCCTCTCTTTACCTGTTTTAGCAGGTGCTATTACTATATTACTCACAGATCGAAATATTAATACATCTTTTTTTGACCCAGCTGGTGGGGGAGACCCAATTCTTTACCAACATTTATTTTGATTTTTTGGTCACCCTGAAGTTTA
KNWR:Ento:10839	KNWR:Ento:10839	M02696:121:000000000-AP85G:1:2109:7820:21635 1:N:0:220	3	NGNAI1146-13	NGNAI1146-13	98.2	Insecta	Diptera	Agromyzidae	Agromyzidae gen. undet.	Agromyzidae sp. BOLD:ACI4583	BOLD:ACI4583	BOLD:ACI4583	British Columbia	GGTACTGGATGAACAGTTTACCCCCCACTTTCATCCGTAATTGCTCATGGAGGAGCATCAGTAGATTTAGCCATTTTTTCATTACACTTAGCCGGTATTTCTTCTATTTTAGGGGCAGTAAATTTTATTACCACTATTATTAATATGCGATCAACAGGTATCACGTTTGATCGAATACCTCTATTTGTATGGTCTGTTCTAATTACAGCTGTTCTTTTACTTTTATCTTTACCTGTATTAGCTGGAGCTATTACAATACTAGTAACAGACCGAAATTTTAATACTTCTTTTTTTGACCCTGCGGGAGGAGGAGACCCAATTTTATATCAGCACTTATTTTGATTTTTTGGTCACCCTGAAGTTTA
KNWR:Ento:10839	KNWR:Ento:10839	M02696:121:000000000-AP85G:1:1106:9569:13182 1:N:0:220	10959	UAMIC1215-13	UAMIC1215-13	98.5	Insecta	Diptera	Anthomyiidae	Hylemya	Hylemya variata	BOLD:AAG2478	BOLD:AAG2478	Alaska	GGTACTGGTTGAACTGTTTACCCCCCCTCTATCTTCTAATATTGCACATGGAGGAGCTTCTGTAGATATAGCAATTTTTTCTTTACATTTAGCAGGAATTTCATCAATTTTAGGTGCTGTAAATTTTATTACTACAGTAATTAATATGCGATCAACAGGAATTACTTTTGATCGAATACCTCTATTTGTATGGTCAGTAGTAATTACAGCTTTACTACTTCTATTATCTCTACCAGTTTTAGCTGGTGCAATTACTATATTACTAACAGATCGAAATTTAAATACTTCATTTTTTGATCCAGCAGGAGGAGGAGACCCAATTTTATATCAACATCTATTTTGATTTTTTGGTCACCCTGAAGTTTA
KNWR:Ento:10839	KNWR:Ento:10839	M02696:121:000000000-AP85G:1:1102:28525:9635 1:N:0:220	320	CNKLB3727-14	CNKLB3727-14	93.4	Insecta	Diptera	Anthomyiidae	Pegomya	Pegomya sp. BOLD:AAG2506	BOLD:AAG2506	BOLD:AAG2506	Yukon Territory	GGAACAGGATGAACTGTTTATCCCCCTCTATCTTCTAATATTGCACATGGAGGAGCTTCTGTTGATTTAGCTATTTTTTTCTTTACATTTAGCTGGAATTTCTTCAATTTTAGGAGCAGTAAACTTTATTACTACTGTAATTAATATACGATCAACTGGAATTACGTTTGATCGAATACCATTATTCGTATGATCTGTAGTAATTACAGCTTTATTATTATTATTATCATTACCAGTATTAGCTGGAGCTATTACAATATTATTAACGGATCGAAATTTAAATACTTCATTTTTTGACCCTGCTGGAGGAGGAGATCCTATTTTATATCAACATTTATTTTGATTTTTTGGTCACCCTGAAGTTTA
KNWR:Ento:10839	KNWR:Ento:10839	M02696:121:000000000-AP85G:1:2113:9042:4339 1:N:0:220	8063	BBDCP123-10	BBDCP123-10	94.7	Insecta	Diptera	Fanniidae	Fannia	Fannia aethiops	BOLD:AAM6399	BOLD:AAM6399	British Columbia	GGAACTGGTTGAACAGTATATCCCCCTCCACTATCATCTAACATCGCTCACGGAGGAGCATCCGTAGATCTAGCTATTTTTTCTTTACATTTAGCTGGAATTTCATCAATTTTAGGAGCTGTGAATTTTATCACAACTGTAATTAATATACGAGCTACAGGAATTACATTTGACCGAATACCTTTATTTGTTTGATCTGTAGTAATTACAGCATTATTATTACTTTTATCTTTACCTGTATTAGCCGGAGCTATTACTATATTATTAACAGATCGAAATATAAATACATCCTTTTTTGACCCTGCAGGAGGAGGAGATCCTATTTTATATCAACATTTATTTTGATTTTTTGGTCACCCTGAAGTTTA
KNWR:Ento:10839	KNWR:Ento:10839	M02696:121:000000000-AP85G:1:2109:22039:19340 1:N:0:220	18	MFAI008-11	MFAI008-11	93.6	Insecta	Diptera	Muscidae	Coenosia	Coenosia impunctata	BOLD:AAQ0758	BOLD:AAQ0758	Alaska	GGTACTGGTTGAACAGTATACCCCCCCTATCTGCTAGAATTGCCCATGCTGGCGCTTCAGTGGATTTAGCAATTTTTTCACTTCATTTAGCTGGAATTTCTTCTATTCTAGGAGCTGTAAATTTTATTACTACTGTAATTAATATACGATCAACAGGAATTACATTTGATCGAATACCTTTATTTGTTTGATCTGTAGTTATTACAGCTTTATTATTATTATTATCATTACCCGTATTAGCTGGAGCAATTACAATATTATTAACAGATCGAAACTTAAATACTTCTTTTTTTGACCCTGCAGGGGGAGGAGATCCAATTTTATACCAACATCTATTTTGATTTTTTGGTCACCCTGAAGTTTA
KNWR:Ento:10839	KNWR:Ento:10839	M02696:121:000000000-AP85G:1:2119:26671:5759 1:N:0:220	1	NGNAR388-14	NGNAR388-14	90.9	Insecta	Diptera	Muscidae	Coenosia	Coenosia pilosissima	BOLD:AAP6478	BOLD:AAP6478	British Columbia	GGTACAGGTTGAACTGTATACCCTCCTTTATCATCTAATATTGCTCATGGAGGAGCTTCTGTAGATTTAGCTATTTTTTCACTTCATTTAGCTGGAATTTCTTCTATTCTAGGAGCTGTAAATTTTATTACTACTGTAATTAAGATACGATCAACAGGCAGTACAGTTGAGCGAATACCGTTATTTGTTTGATCTGTAGTTATTACAGCTTTATGATGATTATTGTCATTACCTGTAGGAGCTGGAGCTAGGACAATAGTAGGAACAGCCCGAAAATAAAAAACGGCCAAGGGGGAGCCGGCAGGACAAGGACACCCAAGCCCATAACAACATTTATATTGATTTTTTGGTCACCCTGAAGTTTA
KNWR:Ento:10839	KNWR:Ento:10839	M02696:121:000000000-AP85G:1:1102:8601:23325 1:N:0:220	2	DKNWR078-11	DKNWR078-11	97.3	Insecta	Diptera	Pipunculidae	Pipunculus	Pipunculus hertzogi	BOLD:AAE4793	BOLD:AAE4793	Alaska	GGTACAGGTTGAACTGTATATCCTCCCCTATCTTCAAACATTGCCCACGGGGGAGCTTCAGTAGATTTAGCAATCTTTTCACTTCACTTAGCCGGAATTTCTTCAATTCTTGGTGCTGTAAACTTTATTACAACTGTAATTAATATACGATCAACAGGAATATCATTTGATCGAATACCTTTATTTGTATGAGCTGTAGTAATTACAGCCCTTTTATTACTTTTGTCTCTGCCAGTTCTAGCCGGAGCTATTACAATACTTTTAACTGACCGAAATTTTAATACATCATTCTTTGACCCAGCAGGAGGTGGTGATCCTATCTTGTACCAACACCTATTCTGATTTTTTGGTCACCCTGAAGTTTA
KNWR:Ento:10839	KNWR:Ento:10839	M02696:121:000000000-AP85G:1:1112:18909:16737 1:N:0:220	1	CNCDF557-11	CNCDF557-11	99.1	Insecta	Diptera	Pipunculidae	Tomosvaryella	Tomosvaryella sp. BOLD:AAG1659	BOLD:AAG1659	BOLD:AAG1659	Alaska	GGAACAGGTTGAACAGTATACCCTCCTCTATCTTCTAATATTGCTCATGGAGGAGCATCTGTTGATTTAGCAATTTTTTCATTACATTTAGCTGGTATTTCATCAATTCTAGGTGCTGTAAATTTTATTACAACAGTAATTAATATACGATCAATAGGAATTTCATTTGATCGAATACCTCTATTTGTATGAGCAGTAGTAATTACAGCTTTATTATTATTATTATCACTACCAGTATTAGCAGGTGCTATTACAATATTATTAACAGATCGAAATTTCAATACATCATTCTTTGATCCCGCTGGAGGAGGTGATCCTATTCTTTATCAACATTTATTCTGATTTTTTGGTCACCCTGAAGTTTA
KNWR:Ento:10839	KNWR:Ento:10839	M02696:121:000000000-AP85G:1:1103:10906:24038 1:N:0:220	1675	DKNWR029-11	DKNWR029-11	98.2	Insecta	Diptera	Rhagionidae	Symphoromyia	Symphoromyia sp. BOLD:AAP6399	BOLD:AAP6399	BOLD:AAP6399	Alaska	GGAACAGGTTGAACTGTTTATCCCCCCCTATCTGCTAGAATTGCCCATGCTGGCGCTTCAGTGGATTTAGCAATTTTTTCTCTACATTTAGCAGGAATTTCTTCTATTTTAGGAGCAGTAAATTTTATTACAACAGTAATTAATATACGATCAACAGGTATTTCATTTGATCGAATACCTTTATTCGTATGAGCTGTTGTAATTACAGCTATTCTTTTATTGTTATCTTTACCTGTATTAGCGGGAGCTATTACAATACTATTAACAGATCGAAATTTAAATACTTCATTCTTTGATCCGGCAGGAGGGGGAGACCCTATTTTATATCAACATCTATTTTGATTTTTTGGGTCACCCTGAAGTTTA
KNWR:Ento:10839	KNWR:Ento:10839	M02696:121:000000000-AP85G:1:2117:27869:15399 1:N:0:220	2	BBDCN994-10	BBDCN994-10	94.1	Insecta	Diptera	Scathophagidae	Scathophaga	Scathophaga furcata	BOLD:ACX4405	BOLD:ACX4405	British Columbia	GGTACAGGTTGAACTGTATATCCCCCTTTATCTTCAAATATTGCTCACGGAGGAGCTTCTGTTGATTTAGCAATTTTTTCTCTTCATTTAGCTGGAATTTCATCTATTTTAGGGGCTGTAAATTTTATCACAACTGTAATTAATATACGATCAACAGGAATTACTTTCGATCGAATACCTTTATTTGTATGATCTGTAGTAATTACAGCTGTATTGCTTCTTTTATCTTTACCAGTTTTAGCCGGAGCTATTACTATATTATTAACTGATCGAAATCTTAATACATCATTTTTTGACCCTGCTGGTGGAGGAGATCCAATTTTATACTAACATTTATTTTGATTCTTTGGTCACCCTGAAGTTTA
KNWR:Ento:10839	KNWR:Ento:10839	M02696:121:000000000-AP85G:1:1110:8509:16002 1:N:0:220	2	CNGLC421-13	CNGLC421-13	94.6	Insecta	Diptera	Sciaridae	Sciaridae gen. undet.	Sciaridae sp. BOLD:AAH3999	BOLD:AAH3999	BOLD:AAH3999	British Columbia	GGTACTGGTTGAACAGTTTATCCCCCTCTATCTTCAACTTTATCCCACTCAGGCGCTTCAGTTGATTTATCAATCTTTTCTCTTCATTTAGCTGGTATTTCTTCAATTTTAGGAGCTGTAAATTTTATTTCCACTATTATTAATATACGAGCCCCCGGAATATTATTCGATAAAATACCTTTATTTGTATGATCTGTATTAATTACAGCTATTCTACTCCTACTTTCATTACCAGTTTTAGCCGGAGCTATCACTATACTTCTAACAGATCGAAATTTGAACACTTCTTTCTTTGACCCGGCTGGAGGAGGAGACCCGATCTTATATCAACACTTATTTTGATTTTTTGGTCACCCTGAAGTTTA
KNWR:Ento:10839	KNWR:Ento:10839	M02696:121:000000000-AP85G:1:2116:22602:16469 1:N:0:220	203	UAMU058-14	UAMU058-14	98.5	Insecta	Diptera	Syrphidae	Hiatomyia	Hiatomyia sp. BOLD:AAZ5940	BOLD:AAZ5940	BOLD:AAZ5940	Alaska	GGTACAGGTTGAACTGTTTATCCCCCCTCTTTCTGCTAGTATTGCTCATGGTGGAGCCTCAGTAGATTTAGCTATTTTTTCATTACATTTAGCAGGTATATCATCTATTTTAGGGGCAGTAAATTTTATTACTACAGTAATTAATATACGATCTACTGGAATCTCATATGATCGAATACCTTTATTTGTATGATCAGTTGTAATTACAGCTCTTCTTCTTTTATTATCTTTACCTGTTTTAGCTGGAGCAATTACTATATTATTAACAGACCGAAACTTAAATACTTCTTTCTTTGATCCAGCTGGAGGAGGAGATCCTATTTTATAACAACATTTATTTTGATTTTTTGGTCACACTGAAGTTTA
KNWR:Ento:10839	KNWR:Ento:10839	M02696:121:000000000-AP85G:1:2101:26236:18819 1:N:0:220	1	RDBAB1153-10	RDBAB1153-10	98.8	Insecta	Hemiptera	Aphididae	Macrosiphum	Macrosiphum euphorbiae	BOLD:AAA6213	BOLD:AAA6213	Alaska	GGTACAGGATGAACTGTTTATCCTCCTTTATCAAACAATATTGCACATAATAACATTTCAGTTGATTTAACTATTTTTTCTTTACATCTAGCAGGAATCTCATCAATTTTAGGAGCAATTAATTTTATTTGTACAATTCTTAATATAATACCAAACAATATAAAATTAAATCAAATTCCTCTTTTTCCTTGATCAATTTTAATTACAGCTATTTTACTAATTTTATCTTTACCAGTTTTAGCTGGTGCCATTACAATACTTTTAACTGATCGTAATTTAAATACATCATTTTTTGATCCAGCAGGAGGAGGAGATCCTATTTTATATCAACATTTATTTTGATTTTTTGGTCACCCTGAAGTTTA
KNWR:Ento:10839	KNWR:Ento:10839	M02696:121:000000000-AP85G:1:1109:28545:16510 1:N:0:220	3	CNCHF1171-12	CNCHF1171-12	98.8	Insecta	Hemiptera	Cicadellidae	Diplocolenus	Diplocolenus evansi			Yukon Territory	GGAACAGGATGAACTGTTTATCCCCCTCTATCAAGAAATATCGCACATGCAGGTGTTAGAGTCGATATATCAATTTTCTCCTTACATTTAGCAGGGATTTCCTCAATCCTAGGGGCGGTAAACTTTATTTCAACCGTTATAAATATACGACCTGCAGGAATAACATTGGATCGAACACCGCTATTCGTATGGTCTGTTCTTATTACCGCAGTTTTACTTCTTTTATCTCTACCAGTATTAGCAGGAGCTATTACTATACTATTAACTGACCGAAATATTAACACAACATTTTTTGACCCTGCCGGAGGAGGGGACCCAATTTTATACCAACACCTATTTTGATTTTTTGGTCACCCTGAAGTTTA
KNWR:Ento:10839	KNWR:Ento:10839	M02696:121:000000000-AP85G:1:1109:14046:23062 1:N:0:220	4	CNCHF856-12	CNCHF856-12	97.7	Insecta	Hemiptera	Cicadellidae	Latalus	Latalus tatraensis			Yukon Territory	GGAACAGGTTGAACAGTTTACCCCCCTCTATCAAGAAACATTGCACATGCTGGAGTGAGTGTAGACATATCAATTTTTTCATTACACTTAGCAGGAATTTCTTCAATCCTTGGAGCAGTAAACTTTATCTCAACTGTTATAAATATACGACCTGCTGGAATAACTTTAGACCGAACACCTTTATTTGTTTGATCTGTTTTAATTACTGCTGTACTTTTACTTCTATCTTTACCTGTACTAGCAGGAGCTATTACGATACTTTTAACTGATCGAAATATCAATACAACATTTTTTGACCCTGCAGGAGGAGGTGACCCAATCTTATAGCAACATTTATTTTGATTTTTTGGTCACCCTGAAGTTTA
KNWR:Ento:10839	KNWR:Ento:10839	M02696:121:000000000-AP85G:1:1105:17942:23986 1:N:0:220	14080	BBHCN362-10	BBHCN362-10	94.6	Insecta	Hemiptera	Cicadellidae	Sonronius	Sonronius dahlbomi	BOLD:AAN8426	BOLD:AAN8426	British Columbia	GGAACAGCAGGGTACTGGATGAACTGTTTATCCCCCTCTCTCTGGAAATATTGCTCATGCAGGTCCTAGTGTTGACATATCAATTTTTTCACTACACTTAGCAGGGGTTTCTTCTATCTTAGGAGCAGTAAATTTTATTACAACTGTAATAAATATACGACCTAGAGGTATAACCTTAGACCGAACCCCATTATTTGTATGATCTGTTTTAATTACTGCAGTCCTATTATTACTATCACTCCCAGTACTTGCTGGGGCAATCACCATACTACTCACTGATCGGAATATTAATACAACTTTCTTCGACCCAGCTGGTGGGGGGGACCCTATCTTATACCAACATTTATTTTGATTTTTTGGTCACCCTGAAGTTTA
KNWR:Ento:10839	KNWR:Ento:10839	M02696:121:000000000-AP85G:1:1104:4336:5809 1:N:0:220	3	UAMIC2085-14	UAMIC2085-14	97.6	Insecta	Hemiptera	Miridae	Teratocoris	Teratocoris saundersi	BOLD:AAG8677	BOLD:AAG8677	Alaska	GGTACAGGTTGAACAGTTTACCCCCCACTATCAACAAATATCTCACATGCCGGAGCCTCCGTTGACCTAGCAATTTTCTCACTCCATCTAGCAGGAGTCTCATCAATCCTTGGGGCCGTGAATTTTATCTCAACAATTATTAATATACGCCCTAATGGGATAACCGAAGAGCGAATTCCATTATTCGTTTGATCAGTAGGAATTACTGCATTATTATTATTATTATCATTACCCGTGTTGGCGGGGGCTATCACCATACTATTAACAGATCGAAACTTTAATACCTCATTTTTTGACCCTGCAGGAGGCGGGGATCCAATTTTATACCAACACTTATTCTGATTTTTTGGTCACCCTGAAGTTTA
KNWR:Ento:10839	KNWR:Ento:10839	M02696:121:000000000-AP85G:1:1104:16014:20580 1:N:0:220	377	UAMIC1935-14	UAMIC1935-14	94.1	Insecta	Hemiptera	Psyllidae	Craspedolepta	Craspedolepta alaskensis	BOLD:ACM1279	BOLD:ACM1279	Alaska	GGAACAGGTTGAACAGTATATCCCCCCCACTTTCTAATAGTTCTTTCCATAGAGGATATTCAATTGATATAGCAATTTTTTCACTTCACCTAGCAGGTATTTCTTCTATCCTTGGAGCAATTAACTTTATCACAACAATTCTAAATATACGATCTTCATTGTGTGATTTAGAAAAAATACCCTTATTTGTTTGATCAGTATTAATTACTGCATTTCTTCTACTTTTAGCCCTTCCAGTGCTAGCTGGAGCAATCACTATACTTTTAACAGACCGAAATTTTAATACTTCTTTTTTTGACCCTAGAGGAGGAGGAGACCCTATTTTATACCAACATTTATTTTGATTTTTTGGTCACCCTGAAGTTTA
KNWR:Ento:10839	KNWR:Ento:10839	M02696:121:000000000-AP85G:1:1106:13222:19599 1:N:0:220	92	UAMIC1922-14	UAMIC1922-14	98.2	Insecta	Hemiptera	Psyllidae	Craspedolepta	Craspedolepta subpunctata	BOLD:AAV0232	BOLD:AAV0232	Alaska	GGAACTGGATGAACAGTATACCCCCCCCTATCTAATAGTGCTTTTCACAGAGGATACTCAATTGATATAGCAATTTTCTCGCTACATCTTGCAGGAATTTCTTCTATTCTAGGAGCAATTAATTTCATTACTACAATTTTAAATATACGATCTTCATTATGTGATTTAGAAAAATTACCCTTATTTGTTTGATCTGTATTAATTACTGCATTTCTTTTACTTTTAGCCCTCCCAGTATTAGCAGGAGCGATTACAATACTCTTAACAGACCGAAATTTCAACACCTCATTTTTTTATCCTAGAGGGGGGGGGGGGATCCTATTTTATACCAACATTTATTCTGATTTTTTGGTCACCCTGAAGTTTA
KNWR:Ento:10839	KNWR:Ento:10839	M02696:121:000000000-AP85G:1:2115:9051:5894 1:N:0:220	1	GBHS5989-10	GBHS5989-10	96	Mammalia	Primates	Homonidae	Homo	Homo sapiens	BOLD:AAA0001	BOLD:AAA0001	Quebec	GGTACTGGATGAACTGTTTATCCCCCCTTAGCAGGGAACTACTCCCACCCTGGAGCCTCCGTAGACCTAACCATCTTCTCCTTACACCTAGCAGGTGTCTCCTCTATCTTAGGGGCCATCAATTTCATCACAACAATTATCAATATAAAACCCCCTGCCATAACCCAATACCAAACGCCCCTCTTCGTCTGATCCGTCCTAATCACAGCAGTCCTACTTCTCCTATCTCTCCCAGTCCTAGCTGCTGGCATCACTATACTACTAACAGACCGCAACCTCAACACCACCTTCTTCGACCCCGCCGGAGGAGGAGACCCCATTCTATACCAACACCTATTCTGATTTTTTGGTCACCCTGAAGTTTA
KNWR:Ento:10840	KNWR:Ento:10840	M02696:121:000000000-AP85G:1:1102:14752:13889 1:N:0:221	10	BBCCN631-10	BBCCN631-10	98.8	Insecta	Coleoptera	Chrysomelidae	Altica	Altica tombacina	BOLD:AAG3656	BOLD:AAG3656	British Columbia	GGTACTGGATGAACAGTTTACCCCCCGTTATCTTCTAATCTTGCACATAACGGTCCATCTGTTGATTTAGCTATTTTCAGTCTTCATTTGGCAGGAATTTCATCAATTTTAGGGGCTATTAATTTTATTACAACAATAATTAATATACGACCACAAGGAATATCAATAGACCAAATACCTCTATTTGTATGGGCAGTATTTATTACAGCCATCCTTTTACTTTTATCCTTACCAGTTCTAGCTGGTGCAATTACAATATTACTTACAGATCGTAATTTAAATACATCTTTTTTTGAACCGGCCGGTGGAGGAGACCCAATTCTCTATCAACATTTATTTTGATTTTTTGGTCACCCTGAAGTTTA
KNWR:Ento:10840	KNWR:Ento:10840	M02696:121:000000000-AP85G:1:1103:5516:20258 1:N:0:221	471	UAMIC1215-13	UAMIC1215-13	96.2	Insecta	Diptera	Anthomyiidae	Hylemya	Hylemya variata	BOLD:AAG2478	BOLD:AAG2478	Alaska	GGTACTGGTTTGAACTGTTTATCCCCCTCTATCTTCTAATATTGCACATGGAGGAGCTTCTGTAGATATAGCAATTTTTTCTTTACATTTAGCAGGAATTTCGTCAATTTTAGGTGCTGTAAATTTTATTACTACAATAATTAATATGCGATCAACAGGAATTACTTTTGATCGAATACCTCTATTTGTATGGTCAGTAGTAATTACAGCTTTACTACCTCTATTATCTCTACCAGTTTTAGCTGGTGCAATTACTATATTACTAACAGATCGAAATTTAAATACTTCATTTTTTGATCCAGCAGGAGGAGGAGACCCAATTTTATATCAACATCTATTTTGATTTTTTGGTCACCCTGAAGTTTA
KNWR:Ento:10840	KNWR:Ento:10840	M02696:121:000000000-AP85G:1:2107:21168:8487 1:N:0:221	16	NGNAJ098-13	NGNAJ098-13	97.5	Insecta	Diptera	Anthomyiidae	Paradelia	Paradelia brunneonigra	BOLD:ACB1112	BOLD:ACB1112	British Columbia	GGTACTGGATGAACTGTTTATCCCCCCTTTATCTTCTAATATTGCCCATGGTGGAGCTTCTGTTGATTTAGCTATTTTTTCTCTTCATTTAGCAGGAATTTCATCAATTTTAGGAGCTGTAAATTTTATTACTACTGTAATTAATATACGATCAACTGGAATTACTTTTGATCGAATACCTTTATTTGTTTGATCAGTAGTAATTACTGCATTATTACTTCTTTTATCTCTACCAGTTTTAGCCGGAGCTATTACTATATTATTAACAGATCGAAATTTAAATACTTCTTTTTTTGACCCTGCTGGGGGAGGAGATCCTATTTTATACCAACATTTATTTTGATTTTTTGGTCACCCTGAAGTTTA
KNWR:Ento:10840	KNWR:Ento:10840	M02696:121:000000000-AP85G:1:2116:20589:8408 1:N:0:221	121	BBDCN953-10	BBDCN953-10	98.2	Insecta	Diptera	Anthomyzidae	Anthomyza	Anthomyza sp. BOLD:AAL8100	BOLD:AAL8100	BOLD:AAL8100	British Columbia	GGAACTGGTTGAACTGTTTATCCCCCCTTTATCATCAGTAATTGCTCATGGAGGACCTTCTGTAGATTTAGCTATTTTTTCTCTTCATTTAGCAGGAATTTCCTCAATTTTAGGTGCTGTAAATTTTATTACAACTGTAATTAATATACGAGCTACTGGAATTACCTTTGACCGAATACCATTATTTGTTTGATCTGTAGTAATTACTGCATTTTTACTATTACTATCTTTACCTGTATTAGCAGGAGCTATTACTATACTTTTAACAGATCGTAATTTGAATACTTCTTTTTTTGATCCTGGTGGTGGAGGAGATCCTATTCTTTACCAACACTTATTTTGATTTTTTGGTCACCCTGAAGTTTA
KNWR:Ento:10840	KNWR:Ento:10840	M02696:121:000000000-AP85G:1:1115:24613:15594 1:N:0:221	2	CNVUA531-14	CNVUA531-14	93.3	Insecta	Diptera	Chironomidae	Smittia	Smittia sp. 16ES	BOLD:AAB0375	BOLD:AAB0375	Yukon Territory	GGTACTGGATGAACTGTTTACCCCCCTTTATCTTCTGGAATTGCTCATGCAGGAGCATCAGTTGATCTTGCTATTTTCTCTCTTCATTTAGCAGGAATTTCCTCAATTTTAGGAGCCGTAAATTTTATTACAACAGTAATTAATATACGATCGAGAGGAATTACTTTTGATCGAATACCTTTATTTGTTTGATCTGTTGTAATTACTGCTATTTTACTACTTTTGTCATTACCAGTTTTAGCTGGAGCAATTACTATGCTTTTAACAGATCGAAATTTAAATACATCATTTTTTGATCCTGCTGGAGGAGGAGACCCTATTTTATACCAACATTTATTTTGATTTTTTGGTCACCCTGAAGTTTA
KNWR:Ento:10840	KNWR:Ento:10840	M02696:121:000000000-AP85G:1:1108:15647:6215 1:N:0:221	229	CNGLF1148-13	CNGLF1148-13	97.4	Insecta	Diptera	Empididae	Empididae gen. undet.	Empididae sp. BOLD:AAF9792	BOLD:AAF9792	BOLD:AAF9792	British Columbia	GGTACAGGATGAACTGTTTATCCTCCCTCTTTCATCTGGAATTGCTCATGGAGGAGCTTCTGTAGATTTAGCAATTTTTTCACTTCATTTAGCAGGTATTTCTTCTATTTTAGGGGCCGTAAATTTTATTACAACAGTAATTAATATACGAACCCCAGGAATTTCATTTGACCGCATACCTCTATTTGTTTGATCAGTAGTAATTACAGCTATTCTATTATTACTTTCTTTACCTGTATTAGCTGGAGCTATTACAATATTATTAACAGATCGAAATTTAAATACTTCATTTTTTGATCCGGCAGGAGGAGGAGACCCTATTTTATATCAACATTTATTTTGATTTTTTGGTCACCCTGAAGTTTA
KNWR:Ento:10840	KNWR:Ento:10840	M02696:121:000000000-AP85G:1:2108:22595:14073 1:N:0:221	3	NGNAS145-14	NGNAS145-14	94.2	Insecta	Diptera	Empididae	Empididae gen. undet.	Empididae sp. BOLD:AAF9792	BOLD:AAF9792	BOLD:AAF9792	British Columbia	GGAACAGGATGAACAGTTTACCCCCCTCTTTCATCTGGAATTGCTCATGGAGGAGCTTCTGTAGATTTAGCAATTTTTTCACTTCATTTAGCAGGTATTTCTTCTATTTTAGGGGCCGTAAATTTTATTACAACAGTAATTAATATACGAACCCCAGGAATTTCATTTGACCGCATACCTCTATTTGTTTGATCAGTTCTTATTACTGCAATTCTACTACTTCTGTCATTACCGGTATTGGCTGGAGCCATCACCATACTCCTTACTGACCGAAATATAAACACAACATTTTTTGACCCTGCAGGTGGGGGTGACCCAATTCTCTAGCAACATTTATTTTGATTTTTTGGTCACCCTGAAGTTTA
KNWR:Ento:10840	KNWR:Ento:10840	M02696:121:000000000-AP85G:1:1109:14717:18152 1:N:0:221	44	DARC466-11	DARC466-11	98.2	Insecta	Diptera	Phoridae	Megaselia	Megaselia diversa	BOLD:ACX1594	BOLD:ACX1594	Yukon Territory	GGTACAGGATGAACTGTATACCCCCCTCTTTCATCTAGAATCGCTCATAGTGGAGCTTCAGTAGATTTAGCAATTTTTTCACTTCATTTAGCTGGAATTTCTTCAATTTTAGGAGCTGTAAATTTTATTACTACTATCATTAATATACGATCATCAGGAATTACTTTTGATCGAATACCTTTATTTGTATGATCAGTAGGAATTACTGCTCTATTACTTTTACTTTCACTTCCTGTTTTAGCTGGTGCTATCACAATACTATTAACTGATCGAAATTTCAATACTTCTTTCTTTGATCCAGCTGGTGGAGGAGATCCAATTTTATATCAACATTTATTTTGATTTTTTGGTCACCCTGAAGTTTA
KNWR:Ento:10840	KNWR:Ento:10840	M02696:121:000000000-AP85G:1:1101:9141:14471 1:N:0:221	14	PNAJS108-09	PNAJS108-09	93.2	Insecta	Diptera	Pipunculidae	Pipunculus	Pipunculus hertzogi	BOLD:AAE4793	BOLD:AAE4793	Alaska	GGAACAGGATGAACAGTATATCCCCCTCTATCTTCTAATATTGCACATGGAGGAGCTTCTGTAGATATAGCAATTTTTTCTTTACATTTAGCAGGAATTTCATCAATTTTAGGTGCTGTAAATTTTATTACTACAGTAATTAATATGCGATCAACAGGAATATCATTTGATCGAATACCTTTATTTGTGTGAGCTGTAGTAATTACAGCCCTTTTATTACTTTTGTCTCTGCCAGTTCTAGCAGGAGCTATTACAATACTTTTAACTGACCGAAATTTTAATACATCATTCTTTGACCCAGCAGGGGGTGGTGATCCTATCTTGTACCAACACCTATTCTGATTTTTTGGTCACCCTGAAGTTTA
KNWR:Ento:10840	KNWR:Ento:10840	M02696:121:000000000-AP85G:1:1101:9114:19143 1:N:0:221	162	DKNWR029-11	DKNWR029-11	98.5	Insecta	Diptera	Rhagionidae	Symphoromyia	Symphoromyia sp. BOLD:AAP6399	BOLD:AAP6399	BOLD:AAP6399	Alaska	GGAACAGGATGAACTGTTTATCCCCCCCTATCTGCTAGAATTGCCCATGCTGGCGCTTCAGTGGATTTAGCAATTTTTTCTCTACATTTAGCAGGAATTTCTTCTATTTTAGGAGCAGTAAATTTTATTACAACAGTAATTAATATACGATCAACAGGTATTTCATTTGATCGAATACCTTTATTCGTATGAGCTGTTGTAATTACAGCTATTCTTTTATTGTTATCTTTACCTGTATTAGCGGGAGCTATTACAATACTATTAACAGATCGAAATTTAAATACTTCATTCTTTGATCCGGCAGGAGGGGGAGACCCTATTTTATATCAACATTTATTTTGATTTTTTGGTCACCCTGAAGTTTA
KNWR:Ento:10840	KNWR:Ento:10840	M02696:121:000000000-AP85G:1:1103:12509:16230 1:N:0:221	1	BBDCQ342-10	BBDCQ342-10	91.4	Insecta	Diptera	Sciaridae	Bradysia	Bradysia sp. BOLD:AAV1315	BOLD:AAV1315	BOLD:AAV1315	British Columbia	GGTACAGGATGAACAGTATATCCCCCTTTGTCCTCAAACTTAGCTCATTCAGGATCATCTGTTGATTTATCAATCTTTTCTTTACATTTAGCAGGGATCTCCTCAATTTTAGGAGCCGTAAACTTTATTTCAACTATTATTAATATACGGGGACCCGGAATATCTTTTGACAAAATGCCATTATTTGTTTGGTCCGTTTTAATTACTGCGGTTCTTTTACTCTTGTCATTACCTGTGCTAGCAGGGGCTATTACTATACTACTTACTGACCGTAATTTAAATACCTCCTTTTTTGACCCTGCCGGTGGGGGAGATCCTATTTTATACCAACATTTATTTTGATTTTTTGGTCACCCTGAAGTTTA
KNWR:Ento:10840	KNWR:Ento:10840	M02696:121:000000000-AP85G:1:1104:26955:15949 1:N:0:221	6	BBDCN497-10	BBDCN497-10	97.1	Insecta	Diptera	Sepsidae	Sepsis	Sepsis neocynipsea	BOLD:ABY4960	BOLD:ABY4960	British Columbia	GGAACTGGATGAACAGTTTATCCCCCTTTATCTTCAGGTATTGCTCATGGAGGAGCTTCAGTTGATTTAGCAATTTTTTCTCTCCATTTAGCAGGAATTTCTTCTATTTTAGGAGCTGTAAATTTTATTACAACAGTTATTAATATACGATCTACAGGAATTACATTTGATCGAATACCTTTATTTGTATGAGCTGTTGTTATTACTGCACTTCTTTTACTTTTATCATTACCTGTTTTAGCAGGAGCAATTACAATATTATTAACTGATCGAAATTTAAATACCTCATTTTTTGACCCTGCTGGAGGTGGTGACCCAATTCTTTACCAACATTTATTTTGATTTTTTGGTCACCCTGAAGTTTA
KNWR:Ento:10840	KNWR:Ento:10840	M02696:121:000000000-AP85G:1:1107:20652:2408 1:N:0:221	6	CNCHF1137-12	CNCHF1137-12	97.7	Insecta	Hemiptera	Cicadellidae	Boreotettix	Boreotettix sp.			Alaska	GGAACTGGATGAACAGTATATCCTCCTCTCTCTAGAAATATTGCTCATGCAGGAGTAAGAGTTGATATATCAATTTTCTCATTACATTTAGCAGGAATCTCATCAATTTTAGGAGCAGTAAACTTCATTTCAACTGTAATAAATATACGACCAATAGGAATAACTTTAGACCGAACACCATTATTTGTATGATCAGTATTAATTACTGCAATCCTATTACTACTATCATTACCAGTACTTGCTGGAGCTATTACAATATTATTGGCAGATCGAAATATTAACACAACATTCTTTGACCCTGCAGGAGGAGGGGATCCAATCTTATACCAACACTTATTTTGATTTTTTGGTCACCCTGAAGTTTA
KNWR:Ento:10840	KNWR:Ento:10840	M02696:121:000000000-AP85G:1:1119:11116:4930 1:N:0:221	42155	CNCHF2119-12	CNCHF2119-12	99.1	Insecta	Hemiptera	Cicadellidae	Euscelis	Euscelis monodens sp. nov	BOLD:ACG7815	BOLD:ACG7815	Yukon Territory	GGAACAGGTTGAACTGTTTATCCCCCTCTTTCAAGTAACATTGCCCATTCAGGAGCGAGAGTAGATTTATCTATCTTCTCTCTGCACTTGGCAGGAATTTCTTCAATTTTAGGTGCAGTAAATTTCATTTCAACTGTAATAAATATACGAACGTCAGGGATACTCTTAGACCGCACTCCCCTTTTTGTGTGATCAGTTCTTATTACTGCAATTCTACTACTTCTGTCATTACCGGTATTGGCTGGAGCCATCACCATACTCCTTACTGACCGAAATATAAACACAACATTTTTTGACCCTGCAGGTGGGGGTGACCCAATTCTCTATCAACATTTATTTTGATTTTTTGGTCACCCTGAAGTTTACTAAGTTTA
KNWR:Ento:10840	KNWR:Ento:10840	M02696:121:000000000-AP85G:1:1101:7224:2800 1:N:0:221	1	CNCHA621-11	CNCHA621-11	95	Insecta	Hemiptera	Miridae	Teratocoris	Teratocoris saundersi			British Columbia	GGAACAGGTTGAACTGTTTATCCTCCGCTATCAACAAATATCTCACATGCCGGAGCCTCCGTTGACCTAGCAATTTTCTCACTCCATCTAGCAGGAGTCTCATCAATCCTTGGGGCCGTGAATTTTATCTCAACAATTATCAATATACGTCCTAATGGGGTAACCGAAGAGCGAATTCCATTATTCGTTTGATCAGTAGGAATTACAGCATTATTATTATTATTATCATTACCCGTGTTGGCCGGGGCTATCACCATACTATTAACAGATCGAAACTTTAATACCTCATTTTTTGACCCTGCAGGAGGCGGGGATCCAATTTTATACCAACACTTATTCTGATTTTTTGGTCACCTGAAGTTTA
KNWR:Ento:10840	KNWR:Ento:10840	M02696:121:000000000-AP85G:1:1119:24253:10683 1:N:0:221	45	UAMIC1935-14	UAMIC1935-14	94.4	Insecta	Hemiptera	Psyllidae	Craspedolepta	Craspedolepta alaskensis	BOLD:ACM1279	BOLD:ACM1279	Alaska	GGTACAGGATGAACAGTTTATCCCCCCACTTTCTAATAGTTCTTTCCATAGAGGATATTCAATTGATATAGCAATTTTTTCACTTCACCTAGCAGGTATTTCTTCTATCCTTGGAGCAATTAACTTTATCACAACAATTCTAAATATACGATCTTCATTGTGTGATTTAGAAAAAATACCCTTATTTGTTTGATCAGTATTAATTACTGCATTTCTTCTACTTTTAGCTCTTCCAGTACTAGCTGGAGCAATCACTATACTTTTAACAGACCGAAATTTTAATACTTCTTTTTTTGACCCTAGAGGAGGAGGAGACCCTATTTTATACCAACATTTATTTTGATTTTTTGGTCACCCTGAAGTTTA
KNWR:Ento:10841	KNWR:Ento:10841	M02696:121:000000000-AP85G:1:1105:20044:15686 1:N:0:222	235	UAMIC1184-13	UAMIC1184-13	95.3	Insecta	Diptera	Anthomyiidae	Botanophila	Botanophila relativa	BOLD:ACG5832	BOLD:ACG5832	Alaska	GGAACTGGTTGAACAGTTTATCCTCCTCTATCTTCTAATATTGCTCATGGTGGAGCTTCTGTTGATTTAGCTATTTTTTCTTTACATTTAGCAGGAATTTCTTCTATTTTAGGAGCTGTAAATTTTATTACTACAGTAATTAATATACGATCTACAGGAATTACTTTCGATCGAATACCATTATTTGTTTGATCCGTAGTAATTACAGCTTTATTACTTTTATTATCTTTACCAGTTTTAGCAGGAGCTATTACTATATTATTAACAGATCGAAATTTAAATACTTCATTTTTTGACCCTGCAGGAGGAGGAGACCCTATTTTATACCAACATTTATTCTGATTTTTTGGGCACCCCTGAAGTTTA
KNWR:Ento:10841	KNWR:Ento:10841	M02696:121:000000000-AP85G:1:1101:15960:1332 1:N:0:222	1	BBDCN953-10	BBDCN953-10	98.5	Insecta	Diptera	Anthomyzidae	Anthomyza	Anthomyza sp. BOLD:AAL8100	BOLD:AAL8100	BOLD:AAL8100	British Columbia	GGAACAGGTTGAACAGTTTACCCCCCTTTATCATCAGTAATTGCTCATGGAGGACCTTCTGTAGATTTAGCTATTTTTTCTCTTCATTTAGCAGGAATTTCCTCAATTTTAGGTGCTGTAAATTTTATTACAACTGTAATTAATATACGAGCTACTGGAATTACCTTTGACCGAATACCATTATTTGTTTGATCTGTAGTAATTACTGCATTTTTACTATTACTATCTTTACCTGTATTAGCAGGAGCTATTACTATACTTTTAACAGATCGTAATTTGAATACTTCTTTTTTGATCCTGCTGGTGGAGGAGATCCTATTCTTTACCAACACTTATTTTGATTTTTTGGTCACCCTGAAGTTTA
KNWR:Ento:10841	KNWR:Ento:10841	M02696:121:000000000-AP85G:1:1107:6953:9697 1:N:0:222	48	BBDCQ231-10	BBDCQ231-10	98.8	Insecta	Diptera	Muscidae	Hydrotaea	Hydrotaea militaris	BOLD:AAG1771	BOLD:AAG1771	British Columbia	GGTACTGGATGAACTGTTTATCCCCCCTTTATCATCTAATATTGCTCATAGAGGAGCTTCTGTTGATTTAGCTATTTTTTCATTACATTTAGCTGGAATTTCATCAATTTTAGGAGCAGTAAATTTTATTACTACTGTAATTAATATACGATCAACTGGAATTACATTTGATCGTATACCTTTATTTGTATGATCAGTAGTAATTACAGCTATTCTTCTATTATTATCATTACCAGTATTAGCAGGAGCTATTACTATATTATTAACAGATCGAAATTTAAATACTTCATTTTTTGATCCAGCTGGAGGAGGTGATCCAATTTTATATCAACATTTATTTTGATTTTTTGGTCACCCTGAAGTTTA
KNWR:Ento:10841	KNWR:Ento:10841	M02696:121:000000000-AP85G:1:1103:16650:2297 1:N:0:222	154	PNAJS121-09	PNAJS121-09	98.5	Insecta	Diptera	Pipunculidae	Pipunculus	Pipunculus campestris	BOLD:AAD0917	BOLD:AAD0917	Alaska	GGTACTGGTTGAACAGTTTATCCTCCCCTATCTTCAAATATTGCACACGGTGGAGCTTCAGTAGACTTAGCAATTTTTTCGCTACATCTAGCTGGAATTTCATCAATTCTTGGGGCTGTAAACTTTATTACAACTGTTATTAATATACGGTCAGCAGGGATATCATTAGATCGAATGCCTTTATTTGTTTGAGCTGTAGTAATTACAGCTCTTTTATTACTTCTGTCTCTTCCAGTCCTAGCAGGGGCTATCACAATGCTTTTAACTGACCGAAATTTCAATACATCATTCTTTGATCCTGCAGGAGGTGGAGACCCGATCTTGTATCAACACCTATTCTGATTTTTTTGGTCACCCTGAAGTTTA
KNWR:Ento:10841	KNWR:Ento:10841	M02696:121:000000000-AP85G:1:1105:12896:11409 1:N:0:222	521	DKNWR029-11	DKNWR029-11	98.2	Insecta	Diptera	Rhagionidae	Symphoromyia	Symphoromyia sp. BOLD:AAP6399	BOLD:AAP6399	BOLD:AAP6399	Alaska	GGTACTGGTTGAACTGTTTATCCTCCCCCTATCTGCTAGAATTGCCCATGCTGGCGCTTCAGTGGATTTAGCAATTTTTTCTCTACATTTAGCAGGGATTTCTTCTATTTTAGGAGCAGTAAATTTTATTACAACAGTAATTAATATACGATCAACAGGTATTTCATTTGATCGAATACCTTTATTCGTATGAGCTGTTGTAATTACAGCTATTCTTTTATTGTTATCTTTACCTGTATTAGCGGGAGCTATTACAATACTATTAACAGATCGAAATTTAAATACTTCATTCTTTGATCCGGCAGGAGGGGGAGACCCTATTTTATATCAACATTTATTTTGATTTTTTGGTCACCCTGAAGTTTA
KNWR:Ento:10841	KNWR:Ento:10841	M02696:121:000000000-AP85G:1:2113:13241:25187 1:N:0:222	2	UAMIC3024-15	UAMIC3024-15	91.4	Insecta	Diptera	Scathophagidae	Microprosopa	Microprosopa pallidicauda	BOLD:ABZ6113	BOLD:ABZ6113	Alaska	GGAACTGGTTGAACTGTTTACCCTCCTCTCTCTGGGAATATTGCTCATGCAGGTCCTAGTGTTGATATATCAATTTTTTCACTACACTTAGCAGGAATCTCTTCAATTTTAGGGGCAGTAAATTTTATTACAACTGTAATTAATATGCGATCAACAGGAATTACTTTTGATCGAATACCTTTATTTGTGTGATCTGTGGTAATTACAGCTCTATTATTACTTTTATCTTTACCTGTTTTAGCTGGAGCTATTACTATGCTATTAACAGATCGAAATCTTAATACTTCATTTTTTGACCCCGCAGGAGGAGGAGATCCAATTTTATACCAACATTTATTTTGATTTTTTGGTCACCCTGAAGTTTA
KNWR:Ento:10841	KNWR:Ento:10841	M02696:121:000000000-AP85G:1:2103:8785:4046 1:N:0:222	11461	CNCHF2119-12	CNCHF2119-12	92.6	Insecta	Hemiptera	Cicadellidae	Euscelis	Euscelis monodens sp. nov	BOLD:ACG7815	BOLD:ACG7815	Yukon Territory	GGTACTGGTTGAACAGTTTATCCCCCCACTTTCAAGTAACATTGCCCATTCAGGAGCGAGAGTAGATTTATCTATCTTCTCTCTGCACTTGGCAGGAATTTCTTCAATTCTAGGTGCAGTAAATTTCATTTCAACTGTAATAAATATACGCACGTCAGGGATACTCTTAGACCGCACTCCCCTTTTTGTGTGATCAGTTCTTATTACAGCAATTCTACTACTTCTGTCATTACCGGTATTGGCTGGAGCCATCACCATACTCCTTACTGACCGAAATTTTAATACTTCTTTTTTTGATCCTAGAGGTGGGGGAGACCCTATTTTATACCAACATTTATTCTGATTTTTTGGTCACCCTGAAGTTTA
KNWR:Ento:10841	KNWR:Ento:10841	M02696:121:000000000-AP85G:1:1104:8986:23718 1:N:0:222	847	CNCHF2119-12	CNCHF2119-12	91.3	Insecta	Hemiptera	Cicadellidae	Euscelis	Euscelis monodens sp. nov	BOLD:ACG7815	BOLD:ACG7815	Yukon Territory	GGTACTGGTTGAACTGTATACCCCCCCCTTTCAAGTAACATTGCCCATTCAGGAGCAAGAGTAGATTTATCTATCTTCTCTCTTCTCTCTACACTTAGCGGGAATTTCTTCAATTTTAGGTGCAGTAAATTTCATTTCAACTGTAATAAATATACGAACATCAGGAATACTGATAGACCGCACTCCTCTTTTTGTGTGATCAGTTCTTATTACTGCAATTCTTTTACTTCTGTCATTACCAGTGTTGGCTGGAGCAATTACTATACTTCTTACTGACCGAAATATAAACACAACATTTTTTGACCCTGCAGGTGGGGGTGACCCAATTCTCTATCAACATTTATTTTGATTTTTTGGTCACCCTGAAGTTTA
KNWR:Ento:10841	KNWR:Ento:10841	M02696:121:000000000-AP85G:1:1101:13164:23177 1:N:0:222	663	CNCHF2119-12	CNCHF2119-12	92.3	Insecta	Hemiptera	Cicadellidae	Euscelis	Euscelis monodens sp. nov	BOLD:ACG7815	BOLD:ACG7815	Yukon Territory	GGAACAGGATGAACAGTTTATCCTCCTCTTTCAAGTAACATTGCCCATTCAGGAGCGAGAGTAGATTTATCTATCTTCTCTCTGCACTTGGCAGGAATTTCTTCAATTTTAGGTGCAGTAAATTTCATTTCAACTGTAATAAATATACGAACGTGAGGAATACTCTTAGACCGCAATCGCCTTTTTGTGTGATCGGTTCTTATTACTGCAATTCTACTACTTCTGTCGTTACCGGTATTGGTTGGAGCCATGGCCAGGCTGCGTACTGGGCGAAAGATAGACACGAGATGTTTTGACCCTGCAGGTGGGGGTGACCCAATTCTCTATCAACATTTATTTTGATTTTTTGGTCACCCTGAAGTTTA
KNWR:Ento:10841	KNWR:Ento:10841	M02696:121:000000000-AP85G:1:1104:5891:3484 1:N:0:222	600	CNCHF2119-12	CNCHF2119-12	90.3	Insecta	Hemiptera	Cicadellidae	Euscelis	Euscelis monodens sp. nov	BOLD:ACG7815	BOLD:ACG7815	Yukon Territory	GGTACTGGTTGAACAGTTTATCCTCCTCTATCTTCAGGAATTGCCCATGGAGGAGCTTCAGTAGATTTAGCAATTTTTTCTCTTCTTTTAGCAGGAATTTCTTCAATTTTAGGTGCAGTAAATTTCATTTCAACTGTAATAAATATACGCACGTCAGGGATACTCTTAGACCGCACTCCCCTTTTTGTGTGATCAGTTCTTATTACAGCAATTCTACTACTTCTGTCATTACCGGTATTGTCTGGATCCATCACCATACTCCTTACTGACCGAAATATAAACACAACATTTTTTGACCCTGCATGTGGGGGTGACCCAATTCTCTATCAACATTTATTTTGATTTTTTGGTCACCCTGAAGTTTA
KNWR:Ento:10841	KNWR:Ento:10841	M02696:121:000000000-AP85G:1:2108:6018:5070 1:N:0:222	500	CNCHF2119-12	CNCHF2119-12	94.4	Insecta	Hemiptera	Cicadellidae	Euscelis	Euscelis monodens sp. nov	BOLD:ACG7815	BOLD:ACG7815	Yukon Territory	GGAACTGGTTGAACTGTATATCCTCCTCTTTCAAGTAACATTGCCCATTCAGGAGCGAGAGTAGATTTATCTATCTTCTCTCTGCACTTGGCAGGAATTTCTTCAATTTTAGGTGCAGTAAATTTCATTTCAACTGTAATAAATATACGAACGTCAGGGATACTCTTAGACCGCACTCCCCTTTTTGTGTGATCAGTTCTTATTACTGCAATTCTACTACTTCTGTCATTACCGGTATTGGCTGGAGCCATCACCATACTCCTTGCGGACCGAAATAAAAAGACAACATTTTTTTACCCTGCGGGTTGCTTTGACCCAATTCTCTAACAACATTGTTTTAGATTTGTTTGTCAACCTGAGGTTTA
KNWR:Ento:10841	KNWR:Ento:10841	M02696:121:000000000-AP85G:1:1109:22877:5101 1:N:0:222	474	CNCHF2119-12	CNCHF2119-12	90	Insecta	Hemiptera	Cicadellidae	Euscelis	Euscelis monodens sp. nov	BOLD:ACG7815	BOLD:ACG7815	Yukon Territory	GGAACTGGATGAACTGTATATCCCCCCTCTCTCTGGAAATATTGCTCATGCAGGTCCTAGTGTTGACATATCAATTTTTTCACTACACTTAGCAGGGGTTTCTTCTATCTTAGGAGCAGTAAATTTTATTACAACTGTAATAAATATACGAACGTCAGGGATACTCTTAGACCGCACTCCCCTTTTTGTGTGATCAGTTCTTATTACAGCAATTCTACTACTTCTGTCATTACCGGTATTGGCTGGAGCCATCACCATACTCCTTACTGACCGAAATATAAACACAACATTTTTTGACCCTGCAGGTGGGGGTGACCCAATTCTCTATCAACATTTATTTTGATTTTTTGGTCACCCTGAAGTTTA
KNWR:Ento:10841	KNWR:Ento:10841	M02696:121:000000000-AP85G:1:1102:26622:5509 1:N:0:222	429	CNCHF2119-12	CNCHF2119-12	92.3	Insecta	Hemiptera	Cicadellidae	Euscelis	Euscelis monodens sp. nov	BOLD:ACG7815	BOLD:ACG7815	Yukon Territory	GGTACAGGTTGAACTGTATATCCCCCTCTTTCAAGTAACATTGCCCATTCAGGAGCGAGAGTAGATTTATCTATTGTCTCTCTGCACTTGGCAGTAATTTCTTCAATTTTAGGTTCATTAAATTTCGTTGCAACGGTAATAAATATACGAACGTCAGGGATACTCTTAGACCGCACTCCCCTTTTTGTGTGGTCATTTTTTATTACAGCAATTCTACTACTTCTGTCATTACCGGTATTGGCTGGAGCCATCACCATACTCCTTACTGACCGAAATATAAACACAACATTTTTTGACCCTGCAGGTGGTGGTGACCCAAGTCTCAATCACCACGCATCGCGATTTTTTGGTCACCCTGAAGTTTA
KNWR:Ento:10841	KNWR:Ento:10841	M02696:121:000000000-AP85G:1:2109:26459:22036 1:N:0:222	5	CNCHF2119-12	CNCHF2119-12	90.6	Insecta	Hemiptera	Cicadellidae	Euscelis	Euscelis monodens sp. nov	BOLD:ACG7815	BOLD:ACG7815	Yukon Territory	GGAACTGGTTGAACTGTTTATCCCCCTCTTTCAAGTAACATTGCCCATTCAGGAGCGAGAGTAGATTTATCTATCTTCTCTCTGCACTTGGCAGGAATTTCTTCAATTTTAGGTGCAGTAAATTTCATTTCAACTGTAATAAATATACGAACGTCAGGGATACTCTTAGACCGCACTCCCCTTTTTGTGTGATAAGCTTTTATTACAGCACTTCTACTACTTCTGTCATTACCGTTATTGGCTGGAGCCATCACCCTGCTCCTTGCTTTTCGACATATAAACACCCCCTTTTTTGCCCCTTCTTTTGGGGGTGACCCCCTTCTCTCTCCCCCTTTCTTTTGATTTTTTGGTCACCCTGAAGTTTA
KNWR:Ento:10841	KNWR:Ento:10841	M02696:121:000000000-AP85G:1:2105:22454:3396 1:N:0:222	7672	BBHCN362-10	BBHCN362-10	97.1	Insecta	Hemiptera	Cicadellidae	Sonronius	Sonronius dahlbomi	BOLD:AAN8426	BOLD:AAN8426	British Columbia	GGAACAGGTTGAACAGTTTACCCCCCCTCTCTCTGGAAATATTGCTCATGCAGGTCCTAGTGTTGACATATCAATTTTTTCACTACACTTAGCAGGGGTTTCTTCTATCTTAGGAGCAGTAAATTTTATTACAACTGTAATAAATATACGACCTAGAGGTATAACCTTAGACCGAACCCCATTATTTGTATGATCTGTTTTAATTACTGCAGTCCTATTATTACTATCACTCCCAGTACTTGCTGGGGCAATCACCATACTACTCACTGATCGGAATATTAATACAACTTTCTTCGACCCAGCTGGTGGGGGGGGACCCTATCTTATACCAACATTTGTTTTGATTTTTTGGTCACCCTGAAGTTTA
KNWR:Ento:10841	KNWR:Ento:10841	M02696:121:000000000-AP85G:1:2114:5435:9222 1:N:0:222	2	CNCHA680-11	CNCHA680-11	95.1	Insecta	Hemiptera	Miridae	Lygus	Lygus sp. BOLD:ABZ1405			British Columbia	GGTACAGGATGAACAGTTTATCCTCCATTATCAGCAAATATCTCCCATAATGGAGCATCAGTAGATTTAGCAATATTTTCACTTAATCTAGCAGGAGTAAGATCAATTTTAGGGGCAGTAAATTTTATTTCAACAATTATTAACATACGACCTATAGGAATAAATGCAGAACGAATCCCACTATTTGTATGATCAGTAGGAATCACTGCACTACTATTACTTTTATCATTACCTGTATTAGCAGGTGCCATTACTATATTATTAACAGATCGAAATTTTAATACATCATTTTTTGACCCAGCAGGAGGTGGGGATCCAATTCTATATCAACATTTATTTTGATTTTTTGGTCACCCTGAAGTTTA
KNWR:Ento:10841	KNWR:Ento:10841	M02696:121:000000000-AP85G:1:1102:14642:2829 1:N:0:222	36	CNCHA1661-11	CNCHA1661-11	98.2	Insecta	Hemiptera	Miridae	Mecomma	Mecomma gilvipes	BOLD:AAZ6451	BOLD:AAZ6451	Alaska	GGAACTGGTTGAACTGTATATCCCCCCCCTTTCAGGACATATATCCCACAATGGAAGATGTGTAGATATAGCAATTTTCTCACTCCATCTAGCCGGAATTTCATCTATTTTAGGAGCAGTAAATTTTATTTCAACAATCTTGAACATACGATCAACAGGTATAACTTTAGAGCAAATCCCATTATTTGTTTGATCTGTAGGAATTACAGCTCTACTTTTATTATTATCGCTACCTGTCCTAGCAGGGGCTATCACCATATTATTAACAGATCGAAACTTCAACACATCTTTCTTTGACCCTGCAGGAGGGGGAGATCCCATCCTTTATCAACATTTATTTTGATTTTTTGGTCACCCTGAAGTTTA
KNWR:Ento:10841	KNWR:Ento:10841	M02696:121:000000000-AP85G:1:1115:15772:9358 1:N:0:222	3500	UAMIC1935-14	UAMIC1935-14	97.9	Insecta	Hemiptera	Psyllidae	Craspedolepta	Craspedolepta alaskensis	BOLD:ACM1279	BOLD:ACM1279	Alaska	GGAACTGGTTGAACTGTATATCCTCCACTTTCTAATAGTTCTTTCCATAGAGGATACTCAATTGATATAGCAATTTTTTCACTTCACCTGGCAGGAATTTCTTCTATCCTTGGAGCAATCAACTTTATTACAACAATTTTAAATATACGATCTTCATTGTGTGATTTAGAAAAGATACCCTTGTTTGTTTGATCAGTATTAATTACTGCATTTCTTCTCCTTTTAGCCCTTCCAGTACTAGCTGGAGCAATCACTATACTTTTAACTGACCGAAATTTTAATACTTCTTTTTTTGATCCTAGAGGTGGGGGGGAGACCCTATTTTATACCAACATTTATTCTGATTTTTTGGTCACCCTGAAGTTTA
KNWR:Ento:10841	KNWR:Ento:10841	M02696:121:000000000-AP85G:1:2102:21242:24680 1:N:0:222	2	UAMU641-14	UAMU641-14	98.2	Insecta	Hymenoptera	Ichneumonidae	Banchinae gen. undet.	Banchinae sp. BOLD:AAH2189	BOLD:AAH2189	BOLD:AAH2189	Alaska	GGAACTGGATGAACAGTTTATCCCCCTTTATCGTTAAATTTAAATCATGAAGGTAATTCTATTGATTTAGCAATTTTTTCGTTGCATATAGCAGGGATGTCATCAATTATGGGGGCTATAAATTTTATTACAACAATTATTAATATAAAAATTTTTAATTTATCATTTGATCAAATAACTTTATTTTCATGATCAATCCAAATTACAGCTATTCTTCTTCTATTAGCTGTCCCGGTATTAGCCGGGGCTATCACAATATTATTGACAGACCGAAATTTAAATACATCTTTTTTTGACCCATCAGGGGGAGGGGACCCAATTCTTTACCAACATTTATTTTGATTTTTTGGTCACCCTGAAGTTTA
KNWR:Ento:10841	KNWR:Ento:10841	M02696:121:000000000-AP85G:1:2111:2009:15509 1:N:0:222	1	MNAK126-10	MNAK126-10	97.3	Insecta	Lepidoptera	Momphidae	Mompha	Mompha sturnipennella	BOLD:AAD0701	BOLD:AAD0701	Yukon Territory	GGAACTGGTTGAACAGTTTATCCCCCTTTATCTTCTAATATTGCACATGTAGGAAGATCCGTTGTTTTAGCTATTTTTTCATTACATTTAGCTGCAATTTCATCAATTTTAGGAGCAATTAATTTTATTACAACAATTATTAATATACGACTTAATAATCTTGCATTTGATCAAATACCTTTATTTGTTTGAGCTGTTGGTATTACTGCTCTTTTATTACTTTTATCATTACCTGTATTAGCTTGAGCTATTACTATATTATTAACAGATCGTAATTTAAATACTTCATTTTTTGACCCTGCAGGAGGAGGAGATCCAATTTTATATCAACATTTATTTTGATTTTTTGGTCACCCTGAAGTTTA
KNWR:Ento:10842	KNWR:Ento:10842	M02696:121:000000000-AP85G:1:2113:19901:22717 1:N:0:223	123	UAMIC2954-15	UAMIC2954-15	95	Insecta	Diptera	Anthomyiidae	Botanophila	Botanophila rubrigena	BOLD:ABX5204	BOLD:ABX5204	Alaska	GGTACAGGATGAACTGTTTATCCTCCCTTTATCTTCTAATATTGCACACGGTGGAGCTTCTGTTGATTTAGCTATTTTTTCTCTACATTTAGCAGGAATTTCATCTATTTTAGGAGCTGTAAATTTCATTACGACTGTAATTAATATACGATCTACAGGAATTACTTTTGACCGAATACCCTTATTTGTATGATCTGTAGTAATTACAGCTTTATTACTTTTACTTTCACTTCCTGTATTAGCAGGAGCTATTACTATACTTTTAACAGATCGAAATTTTAATACTTCTTTTTTTGATCCTGCTGGAGGAGGAGATCCTATTTTATACCAACATTTATTCTGATTTTTTGGTCACCCTGAAGTTTA
KNWR:Ento:10842	KNWR:Ento:10842	M02696:121:000000000-AP85G:1:1105:26029:12436 1:N:0:223	14	UAMIC2954-15	UAMIC2954-15	92.3	Insecta	Diptera	Anthomyiidae	Botanophila	Botanophila rubrigena	BOLD:ABX5204	BOLD:ABX5204	Alaska	GGTACAGGATGAACTGTATACCCTCCCCTTTCCTCTGGAATTGCGCATGCCGGCGGTTCTGTCGATTTAGCGATCTTTTCCCTTCACTTAGCAGGAATTTCATCTATTTTAGGAGCTGTAAATTTCATTACGACTGTAATTAATATACGATCTACAGGAATTACTTTTGACCGAATACCCTTATTTGTATGATCTGTAGTAATTACAGCTTTATTACTTTTATTATCTTTACCAGTTTTAGCCGGAGCTATTACTATACTAGTAACAGATCGAAATTTAAATACCTCATTTTTTGATCCTGCAGGAGGAGGAGATCCTATTTTATATCAACGCTTATTTTGATTTTTTGGTCACCCTGAAGTTTA
KNWR:Ento:10842	KNWR:Ento:10842	M02696:121:000000000-AP85G:1:2117:2877:9919 1:N:0:223	2351	KNWRA103-14	KNWRA103-14	98.8	Insecta	Diptera	Anthomyiidae	Delia	Delia echinata	BOLD:ACT6183	BOLD:ACT6183	Alaska	GGTACTGGTTGAACTGTTTATCCCCCCATTATCTAATAATATCGCTCATAATGGAGCTTCTGTTGATTTAGCAATTTTTTCTCTACATTTAGCTGGAATTTCATCAATTTTAGGTGCTGTAAATTTTATCACAACTGTAATTAATATACGATCTAAAGGAATCACTTTTGACCGTATACCATTATTTGTATGATCAGTAGTAATTACAGCTTTACTTCTCTTATTATCTTTACCTGTTTTAGCAGGTGCTATTACTATATTATTAACTGATCGAAACTTAAATACATCATTTTTTGACCCAGCAGGAGGAGGGGATCCAATTTTATATCAACACTTATTTTGATTTTTTGGTTCACCCTGAAGTTTA
KNWR:Ento:10842	KNWR:Ento:10842	M02696:121:000000000-AP85G:1:1115:2801:11401 1:N:0:223	1281	UAMIC1215-13	UAMIC1215-13	93	Insecta	Diptera	Anthomyiidae	Hylemya	Hylemya variata	BOLD:AAG2478	BOLD:AAG2478	Alaska	GGTACTGGTTGAACTGTATATCCTCCTTTATCTTCAGGAATTGCACATGGAGGAGCTTCTGTAGATATAGCAATTTTTTCTTTACATTTAGCAGGAATTTCATCAATTTTAGGTGCTGTAAATTTTATTACTACAGTAATTAATATGCGATCAACAGGAATTACTTTTGATCGAATACCTCTATTTGTATGGTCAGTAGTAATTACAGCTTTACTACTTCTATTATTATCATTACCAGTATTAGCAGGAGCTATTACTATATTATTAACAGATCGAAATTTAAATACTTCATTTTTTGATCCAGCTGGAGGAGGTGATCCAATTTTATATCAACATTTATTTTGATTTTTTGGTCACCCTGAAGTTTA
KNWR:Ento:10842	KNWR:Ento:10842	M02696:121:000000000-AP85G:1:1117:20850:21104 1:N:0:223	42	UAMIC1215-13	UAMIC1215-13	90.9	Insecta	Diptera	Anthomyiidae	Hylemya	Hylemya variata	BOLD:AAG2478	BOLD:AAG2478	Alaska	GGAACTGGATGAACTGTATATCCTCCGCTATCTTCTGGAATCGCCCATGGAGGTGCCTCAGTTGACTTAGCAATTTTTAGACTTCATTTAGCCGGAGTACCTTCAATTTTAGGAGCCGTAAATTTTATTACAACAGTAATTAATATGCGATCAACAGGAATTACTTTTGATCGAATACCTCTATTTGTATGGTCAGTAGTAATTACAGCTTTACTACTTCTATTATCTCTACCAGTTTTAGCTGGTGCAATTACTATATTACTAACAGATCGAAATTTAAATACTTCATTTTTTGATCCAGCAGGAGGAGGAGACCCAATTTTATATCAACATCTATTTTGATTTTTTGGTCACCCTGAAGTTTA
KNWR:Ento:10842	KNWR:Ento:10842	M02696:121:000000000-AP85G:1:2108:20780:12501 1:N:0:223	9	UAMIC1215-13	UAMIC1215-13	90.3	Insecta	Diptera	Anthomyiidae	Hylemya	Hylemya variata	BOLD:AAG2478	BOLD:AAG2478	Alaska	GGTACAGGTTGAACAGTTTACCCCCCTCTATCTGGGAATATTGCTCATGCAGGTCCTAGTGTTGATATATCAATTTTTTCACTACACTTAGCGGGAATTTCTTCTATCTTAGGAGCAGTAAATTTTATTACTACAGTAATTAATATGCGATCAACAGGAATTACTTTTGATCGAATACCTCTATTTGTATGGTCAGTAGTAATTACAGCTTTACTACTTCTATTATCTCTACCAGTTTTAGCTGGTGCAATTACTATATTACTGACAGATCGAAATTTAAATACATCTTTTTTTGACCCAGCGGGAGGAGGAGACCCTATTTTATACCAACACTTATTTTGATTTTTTGGTCACCCTGAAGTTTA
KNWR:Ento:10842	KNWR:Ento:10842	M02696:121:000000000-AP85G:1:1107:5589:13901 1:N:0:223	656	NGNAI2765-13	NGNAI2765-13	93.3	Insecta	Diptera	Chironomidae	Smittia	Smittia sp. 16ES	BOLD:AAB0375	BOLD:AAB0375	British Columbia	GGTACAGGTTGAACTGTTTACCCCCCTTTATCTTCTGGAATTGCTCATGCAGGAGCATCAGTTGATCTTGCTATTTTCTCTCTTCATTTAGCAGGAATTTCCTCAATTTTAGGAGCCGTAAATTTTATTACAACAGTAATTAATATACGATCGAGAGGAATTACTTTTGATCGAATACCTTTATTTGTTTGATCTGTTGTAATTACTGCTATTTTACTACTTTTATTATCACTGCCAGTTTTAGCCGGTGCTATTACTATATTATTAACAGACCGAAATTTAAATACATCTTTTTTTGACCCAGCGGGAGGAGGAGACCCTATTTTATACCAACACTTATTTTGATTTTTTGGTCACCCTGAAGTTTA
KNWR:Ento:10842	KNWR:Ento:10842	M02696:121:000000000-AP85G:1:1106:29437:13418 1:N:0:223	376	NGNAI2765-13	NGNAI2765-13	91.5	Insecta	Diptera	Chironomidae	Smittia	Smittia sp. 16ES	BOLD:AAB0375	BOLD:AAB0375	British Columbia	GGTACTGGATGAACTGAATATCCTCCTTTATCTTCTGAATTTGCCAATGCAGGAGCATCAGTTGATCTTCCTTTTTTCTCTCTTCATTTACAAGGATTTTCTCAATTTTTAGGAGCCGTAAATTTTATTCCAACAGTAATTATTATACGATCGAGAGGAATTACTTTTGATCGAATGCCTTTATTTGTTTGATCTGTTGTAATTACTGCTATTTTACTACTTTTGTCATTACCAGTTTTAGCTGGAGCAATTACTATGCTTTTAACAGATCGAAATTTAAATACATCATTTTTTGATCCTGCTGGAGGAGGAGACCCTATTTTATACCAACATTTATTTTGATTTTTTGGTCACCCTGAAGTTTA
KNWR:Ento:10842	KNWR:Ento:10842	M02696:121:000000000-AP85G:1:1112:17561:10554 1:N:0:223	26	BBDCP583-10	BBDCP583-10	93.6	Insecta	Diptera	Culicidae	Aedes	Aedes pullatus	BOLD:AAM4536	BOLD:AAM4536	British Columbia	GGTACTGGTTGAACAGTTTACCCCCCTCTTTCTTCTGGAATTGCTCATGCAGGAGCCTCAGTTGATTTAACAATTTTTTCTCTTCATTTAGTTTGGGTCTCATCAATTTTAGGAGCAGTAAATTTTATTACTACTGTTATTAATATACAATCATCAGGAATTACTTTAGAGCGATTACCTTTATTTGTATGATCAGTTGTAATTACAGCTGTATTATTACTTTTATCTTTACCTGTTTTAGCCGGAGCTATTACTATATTATTAACTGACCGAAATTTAAATATATCTTTCTTTGACCCTATTGGAGGAGGAGAAGACCCTATTTTATATCAACATTTATTTTGATTTTTTGGTCACCCTGAAGTTTA
KNWR:Ento:10842	KNWR:Ento:10842	M02696:121:000000000-AP85G:1:1106:5301:13792 1:N:0:223	3448	DKNWR050-11	DKNWR050-11	96.8	Insecta	Diptera	Heleomyzidae	Suillia	Suillia convergens	BOLD:AAV8347	BOLD:AAV8347	Alaska	GGTACAGGTTGAACAGTTTATCCTCCTTTATCTTCAGGAATTGCACACGGAGGAGCTTCAGTAGACTTAGCAATTTTCTCACTACACCTAGCGGGGATTTCCTCAATTTTAGGTGCGGTAATTTTCATCACAACGGTAATTAATATACGATCTACAGGTATTACTTTTGACCGAATACCTTTATTTGTTTGATCTGTTGTTATTACCGCCTTACTACTTTTATTATCACTGCCAGTTTTAACCGGTGCTATTACTATATTATTAACAGACCGATATTTAAATACATCTTTTTTTGTCCCAGCGGTAGGAGGAGACCCTATTTTATACCAACACTTAATTTGATTTTTTTGGTCACCCTGAAGTTTA
KNWR:Ento:10842	KNWR:Ento:10842	M02696:121:000000000-AP85G:1:1106:6632:22396 1:N:0:223	14	DKNWR050-11	DKNWR050-11	90.3	Insecta	Diptera	Heleomyzidae	Suillia	Suillia convergens	BOLD:AAV8347	BOLD:AAV8347	Alaska	GGAACTGGATGAACTGTTTATCCTCCTTTATCTTCAGGAATTGCACACGGAGGAGCTTCAGTAGACTTAGCAATTTTCTCACTACACCTAGCGGGGATTTCCTCAATTTTAGGTGCGGTAAATTTCATCACAACGGTAATTAATATACGATCTACAGGTATTACTTTTGACCGAATACCTTTATTTGTATGATCAGTATTAATTACTGCTATTCTTCTTTTATTATCTTTACCAGTATTGGCTGGAGCAATTACTATATTATTAACAGACTGAAATTTAAATACATCTTTTTTTGACCCTGCTGGAGGGGGTGATCCTATTCTTTAGCAACATTTATTTTGATTTTTTGGTCACCCTGAAGTTTA
KNWR:Ento:10842	KNWR:Ento:10842	M02696:121:000000000-AP85G:1:1118:7762:8945 1:N:0:223	237	KNWRA151-14	KNWRA151-14	98.2	Insecta	Diptera	Hybotidae	Euthyneura	Euthyneura sp. BOLD:AAF9859	BOLD:AAF9859	BOLD:AAF9859	Alaska	GGAACAGGTTGAACAGTTTATCCCCCCCCTTTCATCAGGAATTGCCCATGGAGGGGCATCTGTAGATCTCGCTATTTTTTCTCTACATTTAGCAGGAATTTCATCTATTTTAGGAGCAGTAAATTTTATTACTACAGTAATTAATATGCGATCAACTGGTATTACTTTTGATCGAATACCTTTATTTGTATGATCAGTATTAATTACTGCTATTCTTCTTTTATTATCTTTACCAGTATTGGCTGGAGCAATTACTATATTATTAACAGACCGAAATTTAAATACATCTTTTTTTGTCCCTGCTGGAGGGGGTGATCCTACTCTTTATCAACATTTATTTTGATTTTTTGGTCACCCTGAAGTTTA
KNWR:Ento:10842	KNWR:Ento:10842	M02696:121:000000000-AP85G:1:1119:18691:21553 1:N:0:223	552	DKNWR024-11	DKNWR024-11	90.6	Insecta	Diptera	Lauxaniidae	Lauxania	Lauxania shewelli	BOLD:AAH3531	BOLD:AAH3531	Alaska	GGAACAGGTTGAACAGTTTACCCCCCGCTATCTTCTGGAATCGCCCATGGAGGTGCCTCAGTTGACTTAGCAATTTTTAGACTTCATTTAGCCGGAGTATCTTCAATTTTAGGGGCCGTAAATTTTATTACTACTGTAATCAATATACGATCTACTGGAATTACTTTCGACCGAATACCTTTATTTGTATGATCAGTAGTAATTACAGCTCTTTTATTACTTTTACTTTCACTTCCTGTTTTAGCAGGTGCTATTACTATACTTTTAACTGATCGAAACTTTAATACTTCTTTCTTTGATCCTGCAGGAGGGGGAGATCCTATTTTATATCAACATTTATTCTGATTTTTTGGTCACCCTGAAGTTTA
KNWR:Ento:10842	KNWR:Ento:10842	M02696:121:000000000-AP85G:1:1101:6505:10577 1:N:0:223	23	MFAI008-11	MFAI008-11	98	Insecta	Diptera	Muscidae	Coenosia	Coenosia impunctata	BOLD:AAQ0758	BOLD:AAQ0758	Alaska	GGTAACTGGTTGAACTGTTTACCCTCCTTTATCATCTAATATTGCTCATGGAGGAGCTTCTGTAGATTTAGCTATTTTTTCACTTCATTTAGCTGGAATTTCTTCTATTCTAGGAGCTGTAAATTTTATTACTACTGTAATTAATATACGATCAACAGGAATTACATTTGATCGAATACCTTTATTTGTTTGATCTGTAGTTATTACAGCTTTATTATTATTATTATCATTACCCGTATTAGCTGGAGCAATTACAATATTATTAACAGATCGAAACTTAAATACTTCTTTTTTTGACCCTGCAGGAGGAGGAGATCCAATTTTATACCAACATTTATTTTGATTTTTTGGTCACCCTGAAGTTTA
KNWR:Ento:10842	KNWR:Ento:10842	M02696:121:000000000-AP85G:1:1107:24289:18245 1:N:0:223	102	BBDCQ231-10	BBDCQ231-10	94.1	Insecta	Diptera	Muscidae	Hydrotaea	Hydrotaea militaris	BOLD:AAG1771	BOLD:AAG1771	British Columbia	GGTACTGGATGAACTGTATATCCCCCTTTATCATCTAATATTGCTCATAGAGGAGCTTCTGTTGATTTAGCTATTTTTTCATTACATTTAGCTGGAATTTCATCAATTTTAGGAGCAGTAAATTTTATTACTACTGTAATTAATATACGATCAACTGGAATTACATTTGATCGTATACCTTTATTTGTATGATCAGTAGTAATTACAGCTATTCTTCTATTATTATCATTACCAGTATTAGCAGGAGCTATTACTATATTATTAACTGACCGAAATTTTAATACTTCTTTTTTTGATCCTAGAGGTGGGGGAGACCCTATTTTATACCAACATTTATTCTGATTTTTTGGTCACCCTGAAGTTTA
KNWR:Ento:10842	KNWR:Ento:10842	M02696:121:000000000-AP85G:1:1112:16723:8325 1:N:0:223	323	CNKTG2345-15	CNKTG2345-15	95.6	Insecta	Diptera	Phoridae	Phoridae gen. undet.	Phoridae sp. BOLD:AAG3234	BOLD:AAG3234	BOLD:AAG3234	British Columbia	GGAACTGGATGAACTGTATACCCTCCCTCTTTCATCAAGAATTGCTCATAGTGGAGCTTCAGTTGATTTAGCAATTTTCTCACTTCATCTAGCTGGAATTTCTTCAATTTTAGGTGCTGTAAATTTCATTACTACTATTATTAATATACGTTCATCAGGAATCACTTTTGATCGAATACCTTTATTTGTATGATCAGTAGGAATTACTGCTTTATTACTTTTACTTTCACTTCCTGTTTTAGCAGGTGCTATTACTATACTTTTAACTGATCGAAACTTTAATACTTCTTTCTTTGATCCTGCAGGAGGGGGAGATCCTATTTTATATCAACATTTATTCTGATTTTTTGGTCACCCTGAAGTTTA
KNWR:Ento:10842	KNWR:Ento:10842	M02696:121:000000000-AP85G:1:1110:14718:5924 1:N:0:223	6	PNAJS108-09	PNAJS108-09	98.5	Insecta	Diptera	Pipunculidae	Pipunculus	Pipunculus hertzogi	BOLD:AAE4793	BOLD:AAE4793	Alaska	GGTACTGGATGAACTGTTTATCCTCCCCTATCTTCAAACATTGCACACGGGGGAGCTTCAGTAGATTTAGCAATCTTTTCACTTCACTTAGCCGGAATTTCATCAATTCTTGGTGCTGTAAACTTTATTACAACTGTAATTAATATGCGATCAACAGGAATATCATTTGATCGAATACCTTTATTTGTGTGAGCTGTAGTAATTACAGCCCTTTTATTACTTTTGTCTCTGCCAGCTCTAGCAGGAGCTATTACAATACTTTTAACTGACCGAAATTTTAATACATCATTCTTTGACCCAGCAGGGGGTGGTGATCCTATCTTGTACCAACACCTATTCTGATTTTTTGGTCACCCTGAAGTTTA
KNWR:Ento:10842	KNWR:Ento:10842	M02696:121:000000000-AP85G:1:1109:18883:12238 1:N:0:223	52	RFBAE289-09	RFBAE289-09	98.2	Insecta	Hemiptera	Aphididae	Macrosiphum	Macrosiphum euphorbiae	BOLD:AAA6213	BOLD:AAA6213	Alaska	GGTACTGGTTGAACTGTTTATCCTCCTTTATCAAACAATATTGCACATAATAACATTTCAGTTGATTTAACTATTTTTTCTTTACATTTAGCAGGAATCTCATCAATTTTAGGAGCAATTAATTTTATTTGTACAATTACTAATATAATACCAAACAATATAAAATTAAATCAAATTCCTCTTTTTCCTTGATCAATTTTAATTACAGCTATTTTACTAATTTTATCTTTACCAGTTTTAGCTGGTGCCATTACAATACTTTTAACTGATCGTAATTTAAATACATCATTTTTTGATCCAGCAGGAGGAGGAGATCCTATTTTATATCAACATTTATTTTGATTTTTTGGTCACCCTGAAGTTTA
KNWR:Ento:10842	KNWR:Ento:10842	M02696:121:000000000-AP85G:1:1104:23855:7373 1:N:0:223	5	CNCHF2119-12	CNCHF2119-12	98.2	Insecta	Hemiptera	Cicadellidae	Euscelis	Euscelis monodens sp. nov	BOLD:ACG7815	BOLD:ACG7815	Yukon Territory	GGTACAGGTTGAACAGTTTATCCCCCTCTTTCAAGTAACATTGCCCATTCAGGAGCGAGAGTAGATTTATCTATCTTCTCTCTGCACTTGGCAGGAATTTCTTCAATTTTAGGTGCAGTAAATTTCATTTCAACTGTAATAAATATACGAACGTCAGGGATACTCTTAGACCGCACTCCCCTTTTTGTGTGATCAGTTCTTATTACTGCAATTCTACTACTTCTGTCATTACCGGTATTGGCTGGAGCCATCACCATACTTCTTACTGACCGAAATATAAACACAACATTTTTTGACCCTGCAGGTGGGGGTGACCCAATTCTCTATCAACATTTATTTTGATTTTTTGGTCACCCTGAAGTTTA
KNWR:Ento:10842	KNWR:Ento:10842	M02696:121:000000000-AP85G:1:1115:5027:15666 1:N:0:223	63	CNCHF856-12	CNCHF856-12	97.9	Insecta	Hemiptera	Cicadellidae	Latalus	Latalus tatraensis			Yukon Territory	GGAACTGGTTGAACAGTTTACCCCCCTCTATCAAGAAACATTGCACATGCTGGAGTGAGTGTAGACATATCAATTTTTTCATTACACTTAGCAGGAATTTCTTCAATCCTTGGAGCAGTAAACTTTATCTCAACTGTTATAAATATACGACCTGCTGGAATAACTTTAGACCGAACACCTTTATTTGTTTGATCTGTTTTAATTACTGCTGTACTTTTACTTCTATCTTTACCTGTACTAGCAGGAGCTATTACAATACTTTTAACTGATCGAAATATCAATACAACATTTTTTGACCCTGCAGGAGGAGGTGACCCAATCTTATATCAACATTTATTTTGATTTTTTGGTCACCCTGAAGTTTA
KNWR:Ento:10842	KNWR:Ento:10842	M02696:121:000000000-AP85G:1:1113:12691:7588 1:N:0:223	32171	BBHCN362-10	BBHCN362-10	94.2	Insecta	Hemiptera	Cicadellidae	Sonronius	Sonronius dahlbomi	BOLD:AAN8426	BOLD:AAN8426	British Columbia	GGAACTGGTTGAACTGTATATCCTCCTCTCTCTGGAAATATTGCCCATGCAGGTCCTAGTGTTGACATATCAATTTTTTCACTACACTTAGCAGGGGTTTCTTCTATCTTAGGAGCAGTAAATTTTATTACAACTGTAATAAATATACGACCTAGAGGTATAACCTTAGACCGAACCCCATTATTTGTATGATCTGTTTTAATTACTGCAGTCCTATTATTACTATCACTCCCAGTACTTGCTGGGGCAATTACCATACTACTCCCTGAGCGGAATATTAATACAACTTTCTTCGACCCAGCTGGTGGGGGGGGGGGACCCTATCTTATACCAACATTTGTTTTGATTTTTTGGTCACCCTGAAGTTTA
KNWR:Ento:10842	KNWR:Ento:10842	M02696:121:000000000-AP85G:1:1111:26607:4541 1:N:0:223	14	BBHCN362-10	BBHCN362-10	90.3	Insecta	Hemiptera	Cicadellidae	Sonronius	Sonronius dahlbomi	BOLD:AAN8426	BOLD:AAN8426	British Columbia	GGTACAGGTTGAACTGTTTATCCCCCTCTCTCTGGGAATATTGCTCATGCAGGCCCTAGTGTTGATATATCAATTTTTTCACTACACTTAGCAGGGATTTCTTCTATCTTAGGAGCAGTAAATTTTATTACAACTGTAATAAATATACGACCTAGAGGTATAACCTTAGACCGAACCCCATTATTTGTATGATCTGTTTTAATTACTGAAGTCCTATTATTACTATCACTCCCAGTACTTGCTGGGGCAATCCATGAGCAACCCACTAATCGGACAATTACAACAACACTCGGCGACACAGCTGATGGGGCCACCCCTAGCATATATCAACATTTATTTTGATTTTTTGGTCACCCTGAAGTTTA
KNWR:Ento:10842	KNWR:Ento:10842	M02696:121:000000000-AP85G:1:1107:14244:11256 1:N:0:223	6005	UAMIC1935-14	UAMIC1935-14	97.9	Insecta	Hemiptera	Psyllidae	Craspedolepta	Craspedolepta alaskensis	BOLD:ACM1279	BOLD:ACM1279	Alaska	GGAACAGGTTGAACTGTTTATCCCCCCCACTTTCTAATAGTTCTTTCCATAGAGGATATTCAATTGATATAGCAATTTTTTCACTTCACCTGGCAGGAATTTCTTCTATCCTTGGAGCAATCAACTTTATTACAACAATTTTAAATATACGATCTTCATTGTGTGATTTAGAAAAGATACCCTTGTTTGTTTGATCAGTATTAATTACTGCATTTCTTCTCCTTTTAGCCCTTCCAGTACTAGCTGGAGCAATCACTATACTTTTAACTGACCGAAATTTTAATACTTCTTTTTTTGATCCTAGAGGTGGGGGAGACCCTATTTTATACCAACATTTATTCTGATTTTTTGGTCACCCTGAAGTTTA
KNWR:Ento:10842	KNWR:Ento:10842	M02696:121:000000000-AP85G:1:2108:20364:23234 1:N:0:223	112	KNWRA077-12	KNWRA077-12	98.8	Insecta	Hymenoptera	Ichneumonidae	Mesochorus	Mesochorus prolatus	BOLD:ACE4725	BOLD:ACE4725	Alaska	GGAACTGGTTGAACTGTATATCCTCCTTTATCATTAAATACTAGTCATGAAGGAATATCTGTAGATTTATCAATTTTTTCTTTACATTTAGCGGGTATATCTTCAATTATAGGGGCAATTAATTTTATTACAACTATTTTAAATATACGATGTTTAGGAACATCATTAGATCAAATATCTTTATTCACTTGATCAATAAAAATTACAACAATTTTATTATTATTAGCCGTTCCAGTACTTGCAGGGGCAATTACAATATTATTAGCAGATCGAAATTTAAATACTTCTTTTTTTGATCCTTCAGGAGGAGGAGATCCTATTCTATATCAACACTTATTTTGATTTTTTGGTCACCCTGAAGTTTA
KNWR:Ento:10842	KNWR:Ento:10842	M02696:121:000000000-AP85G:1:1113:14850:4025 1:N:0:223	28	CNGLE183-13	CNGLE183-13	95.9	Insecta	Hymenoptera	Ichneumonidae	Orthocentrinae gen. undet.	Orthocentrinae sp. BOLD:AAH1521	BOLD:AAH1521	BOLD:AAH1521	British Columbia	GGAACTGGTTGAACTGTATATCCCCCCTTATCTTTAAATTTAAATCATGAAGGTATATCAACTGACTTAGCTATTTTTTCTTTACATATAGCAGGAATATCCTCTATTATAGGAGCAATTAATTTTATTACAACTATTTTAAACATACGCCCAAATATAATTTCATTAGATAAAATTTCTCTTTTTACATAATCAATTAAAATCACTGCTATTTTACTTTTATTAGCAGTTCCAGTTCTTGCCGGAGCAATTACAATATTATTAACTGATCGAAATCTTAATACAACTTTTTTTGACCCATCTGGAGGAGGTGATCCAGTCCTTTACCAACACCTATTTTGATTTTTTGGTCACCCTGAAGTTTA
KNWR:Ento:10843	KNWR:Ento:10843	M02696:121:000000000-AP85G:1:2103:13569:4256 1:N:0:224	589	CNKLC3286-14	CNKLC3286-14	90.3	Insecta	Diptera	Agromyzidae	Phytomyzinae gen. undet.	Phytomyzinae sp. BOLD:ACR6818	BOLD:ACR6818	BOLD:ACR6818	Yukon Territory	GGAACTGGATGAACAGTTTATCCTCCGCTCTCTTCAGTGATTGCCCATGGAGGAGCTTCAGTTGATCTTACTATTTTTGCATTACATTTAGCGGGAATTTCATCAATTTTAGGAGCAGTAAATTTTATTACAACTATTATTAATATACGATCTACAGGAATCTCTTTTGATCGTATGCCTTTGTTTGTTTGATCTGTATTAATTACAGCAGTATTACTTCTTTTATCTTTACCGGTTTTAGCAGGAGCTATTACTATATTATTAACAGACCGAAATTTTAATACTTCATTTTTCGATCCTGCAGGAGGGGGAGATCCTATTTTATATCAACATTTATTCTGATTTTTTGGTCACCCCTGAAGTTTA
KNWR:Ento:10843	KNWR:Ento:10843	M02696:121:000000000-AP85G:1:1114:9371:19878 1:N:0:224	20681	BBDCP123-10	BBDCP123-10	95	Insecta	Diptera	Fanniidae	Fannia	Fannia aethiops	BOLD:AAM6399	BOLD:AAM6399	British Columbia	GGTACAGGATGAACAGTATATCCTCCACTATCATCTAACATCGCTCACGGAGGAGCATCCGTAGATCTAGCTATTTTTTCTTTACATTTAGCTGGAATTTCATCAATTTTAGGAGCTGTGAATTTTATCACAACTGTAATTAATATACGAGCTACAGGAATTACATTTGACCGAATACCTTTATTTGTTTGATCTGTAGTAATTACAGCATTATTATTACTTTTATCTTTACCTGTATTAGCCGGAGCTATTACTATATTATTAACAGATCGAAATATAAATACATCCTTTTTTGACCCTGCAGGAGGAGGAGATCCTATTTTATATCAACATTTATTTTGATTTTTTGGTCACCCTGAAGTTTACTGTCTCTTATACACATCTCTA
KNWR:Ento:10843	KNWR:Ento:10843	M02696:121:000000000-AP85G:1:1115:25938:9560 1:N:0:224	293	DKNWR024-11	DKNWR024-11	98.2	Insecta	Diptera	Lauxaniidae	Lauxania	Lauxania shewelli	BOLD:AAH3531	BOLD:AAH3531	Alaska	GGAACAGGTTGAACAGTATATCCTCCGCTATCTTCTGGAATCGCCCATGGAGGTGCCTCAGTTGACTTAGCAATTTTTAGACTTCATTTAGCCGGAGTATCTTCAATTTTAGGGGCCGTAAATTTTATTACTACTGTAATCAATATACGATCTACTGGAATTACTTTCGACCGAATACCTTTATTTGTATGATCAGTAGTAATTACAGCTCTTTTATTACTTTTATCTCTACCCGTATTAGCTGGAGCCATTACAATATTACTAACTGATCGAAATTTAAACACCTCATTCTTTGACCCAGCTGGAGGAGGAGACCCTATTCTTTATCAACATTTATTTTGATTTTTTGGTCACCCTTGAAGTTTA
KNWR:Ento:10843	KNWR:Ento:10843	M02696:121:000000000-AP85G:1:1103:14751:1411 1:N:0:224	37	MFAI008-11	MFAI008-11	95.9	Insecta	Diptera	Muscidae	Coenosia	Coenosia impunctata	BOLD:AAQ0758	BOLD:AAQ0758	Alaska	GGTACAGGTTGAACAGTTTATCCTCCTTTATCATCTAATATTGCTCATGGAGGAGCTTCTGTAGATTTAGCTATTTTTTCACTTCATTTAGCTGGAATTTCTTCTATTCTAGGAGCTGTAAATTTTATTACTACTGTAATTAATATACGATCAACAGGAATTACATTTGATCGAATACCTTTATTTGTTTGATCTGTAGTTATTACAGCTTTATTATTATTATTATCATTACCCGTATTAGCTGGCGCAATTACACTATTATTAACAAATCGAATCTTAAATACATCTTTTTTTTACCCTGCAGGAGGAGGAGATCCAATTTTATACCAACATTGATTTTGATTTTTTGGTCACCCGGAATTTTA
KNWR:Ento:10843	KNWR:Ento:10843	M02696:121:000000000-AP85G:1:1117:26620:5549 1:N:0:224	2	NGNAI1135-13	NGNAI1135-13	90.5	Insecta	Diptera	Muscidae	Coenosia	Coenosia pilosissima	BOLD:AAP6478	BOLD:AAP6478	British Columbia	GGTACAGGATGAACAGTTTATCCTCCTTTATCATCTAATATTGCTCATGGAGGAGCTTCTGTAGATTTAGCTATTTTTTCACTTCATTTAGCTGGAATTTCTTCTATTCTAGGAGCTGTAAATTTTATCACAACTGTAATAATTAGACGAACGACAGGAATTACATTTTACTGAAGACCTTTATTTGTTTGATCTGTAGTAATTACAGCATTATTATTACTTTTATCTTTACCTGTATGAGCCGGAGCGATTACTATATTATTAACAGATCGAAAGATAAAGACAGCCTTGGGTGAACAGGCACGAACAGGAGAACCCAGGGAATAACAAAAAGAATGGCGACAATTTGGTCACCCTGAAGTTTA
KNWR:Ento:10843	KNWR:Ento:10843	M02696:121:000000000-AP85G:1:2105:16180:14155 1:N:0:224	198	BBDCQ231-10	BBDCQ231-10	92.6	Insecta	Diptera	Muscidae	Hydrotaea	Hydrotaea militaris	BOLD:AAG1771	BOLD:AAG1771	British Columbia	GGTACTGGTTGAACTGTTTATCCCCCCTCTTTCTTCTAATGTTGGTCATTCTGGTCCTAGAGTTGATTTAGCAATTTTTTCTCTACATTTAGCAGGTATCTCTTCTATTCTAGGAGCAGTAAATTTTATTACTACTGTAATTAATATACGATCAACTGGAATTACATTTGATCGTATACCTTTATTTGTATGATCAGTAGTAATTACAGCTATTCTTCTATTATTATCATTACCAGTATTAGCAGGAGCTATTACTATATTATTAACAGATCGAAATTTAAATACTTCATTTTTTGATCCAGCTGGAGGAGGTGATCCAATTTTATATCAACATTTATTTTGATTTTTTGGTCACCCTGAAGTTTA
KNWR:Ento:10843	KNWR:Ento:10843	M02696:121:000000000-AP85G:1:1107:15143:7178 1:N:0:224	155	BBDCQ231-10	BBDCQ231-10	94.7	Insecta	Diptera	Muscidae	Hydrotaea	Hydrotaea militaris	BOLD:AAG1771	BOLD:AAG1771	British Columbia	GGTACTGGTTGAACAGTTTACCCTCCTTTATCATCTAATATTGCTCATAGAGGAGCTTCTGTTGATTTAGCTATTTTTTCATTACATTTAGCTGGAATTTCATCAATTTTAGGAGCAGTAAATTTTATTACTACCGTAATTAATATACGATCAACTGGAATTACATTTGATCGTATACCTTTATTTGTATGATCAGTAGTAATTACAGCTATTCTTCTATTATTATCATTACCAGTATTAGCAGGAGCTATTACTATATTATTAACTGATCGTAATATTAATACTTCTTTCTTTGACCCTTCAGGTGGGGGAGATCCTATTTTGTATCAACATTTATTTTGATTTTTTGGTCACCCTGAAGTTTA
KNWR:Ento:10843	KNWR:Ento:10843	M02696:121:000000000-AP85G:1:2106:7793:1700 1:N:0:224	10	UAMU013-14	UAMU013-14	94.4	Insecta	Diptera	Muscidae	Muscidae gen. undet.	Muscidae sp. BOLD:ACL9946	BOLD:ACL9946	BOLD:ACL9946	Alaska	GGTACAGGTTGAACTGTATACCCCCCTTTATCTTCTAATATTGCTCATGGAGGAGCTTCTGTAGACTTAGCAATTTTTTCTTTACACTTAGCAGGAATCTCATCAATTTTAGGAGCTGTAAATTTTATTACTACTGTAATTAATATACGATCAACAGGAATTACTTTTGATCGAATACCATTATTTGTATGATCTGTAGTAATTACAGCTCTACTCCTTTTATTATCTTTACCAGTTTTAGCTGGTGCTATTACTATACTATTAACAGATCGGAATTTAAATACTTCATTTTTTGACCCTGCTGGAGGAGGGGATCCTATTTTATACCAACATTTATTTTGATTTTTTGGTCACCCTGAAGTTTA
KNWR:Ento:10843	KNWR:Ento:10843	M02696:121:000000000-AP85G:1:1101:12414:9863 1:N:0:224	334	MFAI059-11	MFAI059-11	95.6	Insecta	Diptera	Muscidae	Myospila	Myospila meditabunda	BOLD:AAD7145	BOLD:AAD7145	Alaska	GGTACAGGTTGAACTGTTTACCCCCCCGCTTTCTTCTAATATTGCTCGTGAAGGAGCTTCTGTTGATTTAGCAATTTTTTCTCTACATTTAGCTGGAATTTCCTCAATTTTAGGAGCTGTAAATTTTATTACTACTGTAATTAATATACGATCAACTGGAATTACATTTGATCGAATACCTTTATTTGTATGATCAGTAGTAATTACAGCTTTATTATTATTATTATCTCTACCTGTATTAGCAGGAGCTATTACAATACTATTAACAGATCGAAATATAAATACTTCTTTTTTTGATCCTGCTGGTGGAGGAGACCCAATTCTATATCAACATTTATTTTGATTTTTTGGTCACCCTGAAGTTTA
KNWR:Ento:10843	KNWR:Ento:10843	M02696:121:000000000-AP85G:1:2101:16505:7320 1:N:0:224	6	CNKTG2377-15	CNKTG2377-15	98.4	Insecta	Diptera	Psychodidae	Psychoda	Psychoda phalaenoides	BOLD:AAF9317	BOLD:AAF9317	British Columbia	GGTACTGGTTGAACTGTTTATCCTCCCTCTTTCAAGATTAATCTCCCATGGAGGACCTTCTGTAGACTTAGCTATTTTTTCTTTACATTTAGCCGGTATTTCTTCTATTTTAGGGGCAGTAAATTTTATTACCACAATTATTAATATACGATCTATTGGGATTACATTTGAACGAATGCCTTTATTTGTTTGATCTGTATTAATTACTGCAGTATTACTTTTATTATCATTACCTGTTTTAGCTGGAGCAATTACAATACTTTTAACGGATCGAAATTTAAATACTTCTTTCTTCGACCCAGCAGGAGGTGGAGACCCAATTTTATATCAACATTTATTTTGATTTTTTGGTCACCCTGAAGTTTA
KNWR:Ento:10843	KNWR:Ento:10843	M02696:121:000000000-AP85G:1:1103:5290:9843 1:N:0:224	1	DKNWR029-11	DKNWR029-11	92	Insecta	Diptera	Rhagionidae	Symphoromyia	Symphoromyia sp. BOLD:AAP6399	BOLD:AAP6399	BOLD:AAP6399	Alaska	GGAACAGGATGAACAGTTTATCCTCCGCTCCCTTCAGTGATTGCCCATGGAGGAGCTTCAGTTGATCTTACTATTTTTGCATTACATTTAGCGGGAATTTCATCAATTTTAGGAGCAGTAAATTTTATTACAACAGTAATTAATATACGATCAACAGGTATTTCATTTGATCGAATACCTTTATTCGTATGAGCTGTTGTAATTACAGCTATTCTTTTATTGTTATCTTTACCTGTATTAGCGGGAGCTATTACAATACTATTAACAGATCGAAATTTAAATACTTCATTCTTTGATCCGGCAGGAGGGGGAGACCCTATTTTATATCAACATTTATTTTGATTTTTTGGTCACCCTGAAGTTTA
KNWR:Ento:10843	KNWR:Ento:10843	M02696:121:000000000-AP85G:1:1116:28094:15740 1:N:0:224	1	CNBRK378-14	CNBRK378-14	98.2	Insecta	Diptera	Scathophagidae	Scathophaga	Scathophaga suilla	BOLD:AAN6699	BOLD:AAN6699	Newfoundland and Labrador	GGAACAGGTTGAACTGTATATCCTCCTCTTTCTGATGGTATATTCCATGATGGTCCCGCTGTTGATTTTGGTATTCTTAGTTTACATATTGCGGGGGTATCCTCTATTTTAGGTGCTATTAATTTTATTGTTACTATTTTTAATATGAAAACAGTCGGTATGTCTTGGTCTATTGTGCCTTTATTCGTCTGATCTGTTTTAATTACTTCTTTTCTTTTAGCCTTTTCTCTTCCTGTTTTAGCTGCTGCTTTAACTATGCTTTTAACAGATCGAAATTTTAACACTACTTTTTTTGACCCAGTAGGTGGGGGGGATCCTATTTTATACCAACATTTGTTCTGATTTTTTGGTCACCCTGAAGTTTA
KNWR:Ento:10843	KNWR:Ento:10843	M02696:121:000000000-AP85G:1:2101:13523:21055 1:N:0:224	355	ACB1044-06	ACB1044-06	98.2	Insecta	Diptera	Simuliidae	Simulium	Simulium venustum complex	BOLD:AAA4264	BOLD:AAA4264	Yukon Territory	GGTACAGGATGAAACTGTATATCCTCCCCTATCTTCTGGAATTGCTCATGCTGGGGCATCCGTTGATTTAGCTATTTTTTCACTTCATTTAGCGGGAATTTCTTCTATTTTAGGGGCTGTTAATTTTATTACAACTATTATTAATATACGATCAAATGGAATTACTTTTGACCGAATGCCTTTATTTGTATGATCAGTTGTTATTACAGCTGTATTATTACTTCTGTCACTTCCTGTTTTAGCGGGAGCTATTACAATACTTTTAACGGATCGGAACTTAAATACGTCTTTCTTCGACCCCGCAGGAGGAGGAGACCCTATTCTTTACCAACATTTATTTTGATTTTTTGGTCACCCTGAAGTTTA
KNWR:Ento:10843	KNWR:Ento:10843	M02696:121:000000000-AP85G:1:1102:16254:20396 1:N:0:224	1481	CNCHG1367-12	CNCHG1367-12	97.4	Insecta	Hemiptera	Cicadellidae	Idiocerus	Idiocerus sp. BOLD:ACB0208	BOLD:ACB0208	BOLD:ACB0208	Newfoundland and Labrador	GGAACAGGATGAACAGTTTATCCCCCTCTTTCTTCTAATGTTGGTCATTCTGGCCCTAGAGTTGATTTAGCAATTTTTTCTCTACATTTAGCAGGTATCTCTTCTATTCTAGGAGCAGTAAATTTTATTACTACAGTAATTAACATACGATCTTCAGGAATAACTTTTGATCAAACTCCATTATTTGTATGGTCAGTTTTAATTACAGCGGTTTTATTACTACAGTACTTTCATTACCAGTATTAGCTGGTGCTATTACTATATTATTAACTGATCGTAATATTAATACTTCTTTCTTTGACCCTTCAGGTGGGGGAGATCCTATTTTGTATCAACATTTATTCTGATTTTTTGGTCACCCTGAAGTTTA
KNWR:Ento:10843	KNWR:Ento:10843	M02696:121:000000000-AP85G:1:2103:24345:17745 1:N:0:224	1635	BBHCN362-10	BBHCN362-10	96.8	Insecta	Hemiptera	Cicadellidae	Sonronius	Sonronius dahlbomi	BOLD:AAN8426	BOLD:AAN8426	British Columbia	GGTACTGGATGAACTGTTTACCCCCCCCTCTCTCTGGGAATATTGCTCATGCAGGTCCTAGTGTTGATATATCAATTTTTTCACTACACTTAGCGGGGATTTCTTCTATCTTAGGAGCAGTAAATTTTATTACAACTGTAATAAATATACGACCTAGAGGTATAACCTTAGACCGAACCCCATTATTTGTATGATCTGTTTTAATTACTGCAGTCCTATTACTACTATCACTCCCAGTACTTGCTGGGGCAATCACTATACTACTCACTGATCGGAATATTAATACAACTTTCTTCGACCCAGCTGGTGGGGGGGACCCTATCTTATATCAACATTTATTTTGATTTTTTGGTCACCCTGAAGTTTA
KNWR:Ento:10843	KNWR:Ento:10843	M02696:121:000000000-AP85G:1:2119:5394:5934 1:N:0:224	1	NGNAS274-14	NGNAS274-14	95.6	Insecta	Hemiptera	Miridae	Lygus	Lygus sp. BOLD:ABZ1405	BOLD:ABZ1405	BOLD:ABZ1405	British Columbia	GGAACTGGTTGAACAGTTTATCCCCCATTATCAGCAAATATCTCACATAATGGAGCATCAGTAGATTTAGCAATCTTTTCACTTCATCTAGCAGGAGTGAGATCAATTTTAGGAGCAGTACATTTTATTTCAACAATTATTAACATACGACCTATAGGAATAAATGCAGAACGAATCCCATTATTTGTATGATCAGTAGGAATCACTGCACTACTATTACTTTTATCATTACCTTTATTAGCAGGTGCTATTACTATATTATTAACAGATCCTATTTCAACATCTATTTTAATTTTTGGTCACCCTGAAGTTTA
KNWR:Ento:10843	KNWR:Ento:10843	M02696:121:000000000-AP85G:1:1101:23003:14329 1:N:0:224	20	UAMIC2091-14	UAMIC2091-14	97.6	Insecta	Hemiptera	Miridae	Salignus	Salignus tahoensis	BOLD:AAF9947	BOLD:AAF9947	Alaska	GGTACTGGATGAACTGTATACCCCCCATTATCAGCAAATATTTCACATAATGGGGCATCTGTTGATCTAGCAATTTTCTCATTACATTTAGCTGGTGTTTCATCTATCTTAGGGGCAGTAAATTTTATTTCAACAATTATTAATATGCGACCAGAAGGAATAAATGCTGAACGTATTCCATTATTTGTATGGCCAGTAGGAATTACTGCCCTATTATCATTATTATCATTACCAGTATTAGCTGGTGCTATCACAATATTATTAACAGATCGAAATTTTAATACATCATTTTTTGACCCAGCAGGAGGGGGAGACCCTATTCTATATCAACATTTATTTTGATTTTTTGGTCACCCTGAAGTTTA
KNWR:Ento:10843	KNWR:Ento:10843	M02696:121:000000000-AP85G:1:1115:17996:15633 1:N:0:224	6192	UAMIC1935-14	UAMIC1935-14	93.6	Insecta	Hemiptera	Psyllidae	Craspedolepta	Craspedolepta alaskensis	BOLD:ACM1279	BOLD:ACM1279	Alaska	GGTACTGGATGAACTGTTTACCCCCCTCCACTTTCTAATAGTTCTTTCCATAGAGGATATTCAATTGATATAGCAATTTTTTCACTTCACCTAGCAGGTATTTCTTCTATCCTTGGAGCAATTAACTTTATCACAACAATTCTAAATATACGATCTTCATTGTGTGATTTAGAAAAAATACCCTTATTTGTTTGATCAGTATTAATTACTGCATTTCTTCTACTTTTAGCCCTTCCAGTGCTAGCTGGAGCAATCACTATACTTTTAACAGACCGAAATTTTAATACTTCTTTTTTTGACCCTAGAGGAGGAGGAGACCCTATTTTATACCAACATTTATTTTGATTTTTTGGTCACCCTGAAGTTTA
KNWR:Ento:10843	KNWR:Ento:10843	M02696:121:000000000-AP85G:1:1102:14924:21353 1:N:0:224	1105	UAMIC1922-14	UAMIC1922-14	97.9	Insecta	Hemiptera	Psyllidae	Craspedolepta	Craspedolepta subpunctata	BOLD:AAV0232	BOLD:AAV0232	Alaska	GGTACTGGTTGAACTGTATATCCCCCCCCCTATCTAATAGTGCTTTTCACAGAGGATACTCAATTGATATAGCAATTTTCTCGCTACATCTTGCAGGAATTTCTTCTATTCTAGGAGCAATTAATTTCATTACTACAATTTTAAATATACGATCTTCATTATGTGATTTAGAAAAATTACCCTTATTTGTTTGATCTGTATTAATTACTGCATTTCTTTTACTTTTAGCCCTCCCAGTATTAGCAGGAGCGATTACAATACTTTTAACAGACCGAAATTTTAACACCTCATTTTTTGATCCTAGAGGGGGAGGGGATCCTATTTTATACCAACATTTATTCTGATTTTTTGGTCACCCTGAAGTTTA
KNWR:Ento:10843	KNWR:Ento:10843	M02696:121:000000000-AP85G:1:2116:27577:7738 1:N:0:224	94	CNCHV291-10	CNCHV291-10	96.5	Insecta	Hymenoptera	Braconidae	Microgaster	Microgaster jft23	BOLD:AAB8447	BOLD:AAB8447	Alaska	GGTACTGGATGAACTGTTTATCCCCCATTATCATTAATTTTAGGTCATGGAGGTATATCTGTTGATTTAGGAATTTTTTCTCTACATTTAGCTGGTGCTTCTTCAATTATAGGTGCAGTAAATTTTATTACAACAATTATAAATATGCGGGTTAATATATATTTAATAGATAAAATATCTTTATTTTCTTGATCAGTTTTTATTACAGCAATTTTATTATTATTATCTTTACCTGTTTTAGCAGGGGCTATCACTATATTATTAACTGATCGAAATATTAATACTAGATTTTTTGATCCAGCTGGTGGAGGGGATCCTATTTTATACCAACATTTATTTTGATTTTTTGGTCACCCTGAAGTTTTA
KNWR:Ento:10843	KNWR:Ento:10843	M02696:121:000000000-AP85G:1:1112:18546:22236 1:N:0:224	35	HYCNG2206-12	HYCNG2206-12	98.2	Insecta	Hymenoptera	Ichneumonidae	Polysphincta	Polysphincta limata	BOLD:AAH1739	BOLD:AAH1739	Yukon Territory	GGAACTGGATGAACTGTTTACCCTCCATTATCTATAAATTTAAATCATGAAGGAATATCAATTGATTTAGCTATTTTTTCTCTTCATATAGCTGGAATATCATCTATCATAGGAGCTATTAATTTTATTTCTACTATTATAAATATACGACCTAATATAATAAACTTAGAAAAAATATCATTATTTACTTGATCAATTAAAATTACCGCAATTTTACTTTTACTAGCTGTACCAGTTTTAGCTGGAGCAATTACTATATTATTAACTGATCGAAACTTAAATACTTCATTTTTTAATCCTTCTGGTGGAGGAGACCCTATTTTATATCAACATTTATTTTGATTTTTTGGTCACCCTGAAGTTTA
KNWR:Ento:10843	KNWR:Ento:10843	M02696:121:000000000-AP85G:1:1115:11372:3668 1:N:0:224	2	HARC376-11	HARC376-11	91.4	Insecta	Hymenoptera	Pteromalidae	Pteromalidae gen. undet.	Pteromalidae sp. BOLD:AAZ6757	BOLD:AAZ6757	BOLD:AAZ6757	Yukon Territory	GGTACAGGTTGAACTGTATATCCTCCTTTATCATCTAATTTATCTCATAGAGGTCCCTCTGTTGATTTATCTATTTTTTCATTACATATTGCAGGAGTTTCTTCTATTATAGGTTCAATTAATTTTATTACTACAATTTTAAATATAAAAATTTTTAAAATTGAAACTATTCCTTTATTAGCTTGAGCTATATTATTAACAGCTATTTTATTATTATTATCATTACCTGTATTAGCAGGTGCTATTACAATATTACTATTTGATCGTAATTTAAATACTTCATTTTTTGATCCAGCAGGTGGAGGTGATCCTATTTTATATCAACATTTATTTTGATTTTTTGGTCACCCTGAAGTTTA
KNWR:Ento:10843	KNWR:Ento:10843	M02696:121:000000000-AP85G:1:1101:7553:5370 1:N:0:224	17	UAMIC680-13	UAMIC680-13	96.8	Insecta	Hymenoptera	Tenthredinidae	Amauronematus	Amauronematus fallax	BOLD:ABU5508	BOLD:ABU5508	Alaska	GGAACTGGTTGAACTGTTTACCCTCCATTATCAAGAAGAATTTCACATTCAGGAGCATCAGTAGATTTAACTATTTTTTCCCTTCATTTAGCAGGTATTTCATCAATTTTAGGAGCAATTAATTTTATTTCAACAATAATCAACATAAAATTAAAAGGAATAAGGTTTGAACAAATACCTTTATTTGTATGAGCAGTATCATTAACTGCATTATTATTACTATTATCCTTACCAGTACTAGCTGGTGCTATTACTATACTTCTTACAGACCGAAATTTAAATACATCATTCTTTGATCCATCGGGAGGAGGAGACCCAATTCTATATCAACACTTATTTTGATTTTTTGGTCACCCTGAAGTTTA
KNWR:Ento:10843	KNWR:Ento:10843	M02696:121:000000000-AP85G:1:1106:21253:9496 1:N:0:224	11	HARC277-11	HARC277-11	90.3	Insecta	Hymenoptera	Tenthredinidae	Tenthredinidae gen. undet.	Tenthredinidae sp. BOLD:AAY6891	BOLD:AAY6891	BOLD:AAY6891	Yukon Territory	GGTACAGGTTGAACTGTTTATCCCCCCACTATCAAGAAGAATTTCCCATTCAGGAGCATCAGTAGACCTAACTATTTTTTCATTACATTTAGCAGGAATTTCATCAATCCTAGGGGCAATTAATTTTATTTCAACAATAATTAATATAAAATTAAAAAGAATAAAATTTGAACAAATACCATTATTTTCATGGGCAGTATCACTAACTGCTTTACTATTACTTTTATCTTTACCTGTATTAGCAGGAGCTATTACTATACTTCTCACAGATCGTAATTTAAATACATCATTTTTTGACCCATCAGGAGGAGGAGACCCAATCCTATATCAACATTTATTCTGATTTTTTGGTCACCCTGAAGTTTA
KNWR:Ento:10843	KNWR:Ento:10843	M02696:121:000000000-AP85G:1:1119:11448:19472 1:N:0:224	2	GBHS5989-10	GBHS5989-10	96.5	Mammalia	Primates	Homonidae	Homo	Homo sapiens	BOLD:AAA0001	BOLD:AAA0001	Quebec	GGTACAGGTTGAACTGTATATCCTCCTTAGCAGGGAACTACTCCCACCCTGGAGCCTCCGTAGACCTAACCATCTTCTCCTTACACCTAGCAGGTGTCTCCTCTATCTTAGGGGCCATCAATTTCATCACAACAATTATCAATATAAAACCCCCTGCCATAACCCAATACCAAACGCCCCTCTTCGTCTGATCCGTCCTAATCACAGCAGTCCTACTTCTCCTATCTCTCCCAGTCCTAGCTGCTGGCATCACTATACTACTAACAGACCGCAACCTCAACACCACCTTCTTCGACCCCGCCGGAGGAGGAGACCCCATTCTATACCAACACCTATTCTGATTTTTTGGTCACCCTGAAGTTTA
KNWR:Ento:10844	KNWR:Ento:10844	M02696:121:000000000-AP85G:1:2110:7687:3354 1:N:0:225	42416	CNGLA035-13	CNGLA035-13	92.3	Insecta	Diptera	Bibionidae	Bibionidae gen. undet.	Bibionidae sp. BOLD:ACG6252	BOLD:ACG6252	BOLD:ACG6252	British Columbia	GGAACAGGTTGAACTGTATATCCTCCCTTATCTAGAACTCTTTCTCATAGAGGGGGGTCTGTTGATTTAGCTATCTTTTCTCTTCATTTAGCCGGTATCTCTTCTATTTTAGGAGCAGTAAATTTTATTACAACTGTAATTAATATACGAGCAATTGGAATTTCATTTGATCGAATGCCTCTTTTTGTATGATCAGTAGTTATTACTGCTATTTTATTACTTCTGTCATTACCAGTATTAGCCGGAGCAATTACTATATTATTAACTGACCGAAATTTAAATACTTCGTTTTTTGACCCAATAGGAGGGGGAGACCCTATTTTATACCAACATTTATTTTGATTTTTTGGTCACCCTGAAGTTTACTGTCTCTTATACACAT
KNWR:Ento:10844	KNWR:Ento:10844	M02696:121:000000000-AP85G:1:1112:17126:24772 1:N:0:225	340	CNGLF1148-13	CNGLF1148-13	92.4	Insecta	Diptera	Empididae	Empididae gen. undet.	Empididae sp. BOLD:AAF9792	BOLD:AAF9792	BOLD:AAF9792	British Columbia	GGTACAGGATGAACTGTTTACCCTCCTCTTTCACCTGGAATTGCTCATGGAGGAGCTTCTGTAGATTTAGCAATTTTTTCACTTCATTTAGCAGGTATTTCTTCTATTTTAGGGGCCGTAAATTTTATTACAACAGTAATTAATATACGAACCCCAGGAATTTCATTTGACCGTATACCTCTATTTGTTTGATCAGTAGTAATTACAGCTATTCTATTATTACTTCTGTCATTACCAGTATTAGCTGGAGCAATTACTATATTATTAACTGACCGAAATTTAAATACTTCGTTTTTTGACCCAATAGGAGGGGGAGACCCTATTTTATACCAACATTTATTTTGATTTTTTGGTCACCCTGAAGTTTA
KNWR:Ento:10844	KNWR:Ento:10844	M02696:121:000000000-AP85G:1:1102:15727:17694 1:N:0:225	221	CNGLF1148-13	CNGLF1148-13	93.3	Insecta	Diptera	Empididae	Empididae gen. undet.	Empididae sp. BOLD:AAF9792	BOLD:AAF9792	BOLD:AAF9792	British Columbia	GGTACTGGTTGAACAGTATATCCTCCCCTTATCTAGAACTCTTTCTCATAGAGGGGGGTCTGTTGATTTAGCTATCTTTTCTCTTCATTTAGCAGGTATTTCTTCTATTTTAGGGGCCGTAAATTTTATTACAACAGTAATTAATATACGAACTCCAGGAATTTCATTTGACCGCATGCCTCTATTTGTTTGATCAGTAGTAATTACAGCTATTCTATTATTACTTTCTTTACCTGTATTAGCTGGAGCTATTACAATATTATTAACAGATCGAAATTTAAATACTTCATTTTTTGATCTGGCAGGAGGAGGGGACCCAATTTTATATCAACATTTATTTTGATTTTTTGGTCACCCTGAAGTTTA
KNWR:Ento:10844	KNWR:Ento:10844	M02696:121:000000000-AP85G:1:1101:23211:17745 1:N:0:225	11	BBDCN497-10	BBDCN497-10	94.7	Insecta	Diptera	Sepsidae	Sepsis	Sepsis neocynipsea	BOLD:ABY4960	BOLD:ABY4960	British Columbia	GGTACTGGATGAACTGTTTATCCCCCTTTATCTTCAGGTATTGCTCATGGAGGAGCTTCAGTTGATTTAGCAATTTTTTCTCTCCATTTAGCAGGAATTTCTTCTATTTTAGGAGCTGTAAATTTTATTACAACAGTTATTAATATACGATCTACAGGAATTACATTTGATCGAATACCTTTATTTGTATGAGCTGTTGTTATTACTGCACTTCTTTTACTTTTATCATTACCTGTTTTAGCAGGAGCAATTACAATATTATTAACTGACCGAAATTTAAATACTTCGTTTTTTGACCCAATAGGAGGGGGAGACCCTATTTTATACCAACATTTATTTTGATTTTTTGGTCACCCTGAAGTTTA
KNWR:Ento:10844	KNWR:Ento:10844	M02696:121:000000000-AP85G:1:1107:23691:11325 1:N:0:225	299	SSKNA680-15	SSKNA680-15	96.6	Insecta	Hemiptera	Cicadellidae	Balclutha	Balclutha sp. BOLD:AAG8963	BOLD:AAG8963	BOLD:AAG8963	British Columbia	GGTACAGGTTGAACAGTATACCCTCCCATTGTCAAGAAATATCGCACATGCAGGACCTAGAGTAGATATAGCAATTTTCTCTTTACATTTAGCAGGAATTTCTTCAATCTTAGGGGCAGTAAACTTTATCACAACTGTAATAAACATGCGCCCAACAGGAATAAATATAGATCGAACACCTCTATTTGTATGGTCAGTAATTATCACAGCAGTTTTACTATTGTTGTCACTACCGGTACTTGCAGGGGCTATTACTATACTTTTAACAGACCGAAATATTAATACAACATTCTTTGACCCAGCTGGTGGGGGAGACCCTATCTTATACCAACACTTATTTTGATTTTTTGGTCACCCTGAAGTTTA
KNWR:Ento:10844	KNWR:Ento:10844	M02696:121:000000000-AP85G:1:1103:20270:3281 1:N:0:225	2155	CNCHF2119-12	CNCHF2119-12	97.4	Insecta	Hemiptera	Cicadellidae	Euscelis	Euscelis monodens sp. nov	BOLD:ACG7815	BOLD:ACG7815	Yukon Territory	GGTACTGGTTGAACTGTATACCCTCCCCTCTTTCAAGTAACATTGCCCATTCAGGAGCGAGAGTAGATTTATCTATCTTCTCTCTCCACTTGGCAGGGATTTCTTCAATTTTAGGTGCAGTAAATTTCATTTCAACTGTAATAAATATACGAACGTCAGGGATACTCTTAGACCGCACTCCCCTTTTTGTGTGATCAGTTCTTATTACTGCAATTCTACTACTTCTGTCATTACCGGTATTGGCTGGAGCCATCACCATACTCCTTACTGACCGAAATATAAACACAACATTTTTTGACCCTGCAGGTGGGGGTGACCCAATTCTCTATCAACATTTATTTTGATTTTTTGGTCACCCTGAAGTTTA
KNWR:Ento:10845	KNWR:Ento:10845	M02696:121:000000000-AP85G:1:1111:2548:12298 1:N:0:226	25	SPICA1823-11	SPICA1823-11	97.6	Arachnida	Araneae	Thomisidae	Misumena	Misumena vatia	BOLD:AAA6275	BOLD:AAA6275	British Columbia	GGAACTGGATGAACTGTTTATCCCCCTTTAGCTTCTAGAGTAGGTCATATGGGAAGATCAATGGATTTTGCTATTTTTTCTCTTCATTTAGCTGGTGCTTCATCAATTATAGGAGCTGTTAATTTTATTTCTACAATTATTAATATACGGAGTGAGGGGATAAGAATGGAAAAAGTTCCTTTATTTGTTTGATCTGTTTTAATTACAGCTATTTTATTGCTTTTATCGCTTCCTGTTTTAGCAGGAGCTATTACTATATTATTGACTGATCGTAATTTTAATACTTCTTTTTTTGACCCGGCTGGGGGAGGGGATCCAATTTTATTTCAACATTTGTTTTGATTTTTTGGTCACCCTGAAGTTTA
KNWR:Ento:10845	KNWR:Ento:10845	M02696:121:000000000-AP85G:1:1117:8675:11428 1:N:0:226	1920	BBCCN631-10	BBCCN631-10	97.9	Insecta	Coleoptera	Chrysomelidae	Altica	Altica tombacina	BOLD:AAG3656	BOLD:AAG3656	British Columbia	GGAACTGGATGAACAGTTTATCCTCCCCGTTATCTTCTAATCTTGCACATAACGGTCCATCTGTTGATTTAGCTATTTTCAGTCTTCATTTAGCAGGAATTTCATCAATTTTAGGGGCTATTAATTTTATTACAACAATAATTAATATACGACCACAAGGAATATCGATAGACCAAATACCTCTATTTGTATGGGCAGTATTAATTACAGCCATCCTTTTACTTTTATCCTTACCAGTTCTAGCTGGTGCAATTACAATATTACTTACGGATCGTAATTTAAATACATCTTTTTTTGAACCGGCCGGTGGAGGAGACCCAATTCTCTATCAACATCTATTTTGATTTTTTGGTCACCCTGAAGTTTA
KNWR:Ento:10845	KNWR:Ento:10845	M02696:121:000000000-AP85G:1:1101:7802:17397 1:N:0:226	35	BBCCN670-10	BBCCN670-10	90.3	Insecta	Coleoptera	Chrysomelidae	Altica	Altica tombacina	BOLD:AAG3656	BOLD:AAG3656	British Columbia	GGTACTGGATGAACTGTATACCCCCCATTATCTTCTAATCTTGCACATAACGGCCCATCTGTTGATTTAGCTATTTTCAGTCTTCATTTAGCAGGAATTTCATCAATTTTAGGGGCTATTAATTTTATTACAACAATAATTAATATACGACCGCAAGGAATATCAATAGACCAAATACCTCTATTTGTTTGATCAGTAGTAATTACAGCTATTCTATTATTACTTTCTTTACCTGTATTAGCTGGAGCTATTACAATATTATTAACAGATCGAAATTTAAATACTTCATTTTTTGATCCGGCAGGAGGAGGAGACCCTATTTTATATCAACATTTATTTTGATTTTTTGGTCACCCTGAAGTTTA
KNWR:Ento:10845	KNWR:Ento:10845	M02696:121:000000000-AP85G:1:1111:15801:15882 1:N:0:226	33	CNCCF899-12	CNCCF899-12	90.3	Insecta	Coleoptera	Chrysomelidae	Altica	Altica tombacina	BOLD:AAG3656	BOLD:AAG3656	British Columbia	GGTACAGGATGAACAGTTTATCCTCCTCTTTCATCTGGAATTGCTCATGGAGGAGCTTCTGTAGATTTAGCAATTTTTTCACTTCATTTAGCAGGTATTTCCTCTATTTTAGGGGCTATTAATTTTATTACAACAATAATTAATATACGACCGCAAGGAATATCAATAGACCAAATACCTCTATTTGTATGAGCAGTATTTATTACAGCCATCCTTTTACTTTTATCCTTACCAGTTCTAGCTGGTGCAATTACAATATTACTTACAGATCGTAATTTAAATACATCTTTTTTTGAACCAGCTGGAGGAGGAGACCCTATTTTATATCAACATTTATTTTGATTTTTTGGTCACCCTGAAGTTTA
KNWR:Ento:10845	KNWR:Ento:10845	M02696:121:000000000-AP85G:1:2114:5259:22195 1:N:0:226	1	BBCCN586-10	BBCCN586-10	90.3	Insecta	Coleoptera	Chrysomelidae	Altica	Altica tombacina	BOLD:AAG3656	BOLD:AAG3656	British Columbia	GGAACAGGTTGAACTGTATATCCCCCATTATCTTCTAATCTTGCACATAACGGCCCATCTGTTGATTTAGCTATTTTCAGTCTTCATTTAGCAGGAATTTCATCAATTTTAGGGGCTATTAATTTTATTACAACAATAATTAATATACGACCACAAGGAATATCAATAGACCACATACCTATAGTTGTATGAGCAGTATTTATTACAGCCATACTTTGACTTTTATCCGTACCAATTCGAGCTGCTTCAAGCACAAGACAACTGACAGAGCGGAATAGAAATACATCTAGGTAAAACCAGCCGGTGGAGGAGACCCAATTCTCTATCAACATCTATTTTGATTTTTTGGTCACCCTGAAGGTTA
KNWR:Ento:10845	KNWR:Ento:10845	M02696:121:000000000-AP85G:1:1108:10201:3305 1:N:0:226	305	BBDCM957-10	BBDCM957-10	98.2	Insecta	Diptera	Anthomyiidae	Anthomyiidae gen. undet.	Anthomyiidae sp. BOLD:AAG2469	BOLD:AAG2469	BOLD:AAG2469	British Columbia	GGTACTGGTTGAACAGTATATCCCCCCCCTATCTTCTAACATCGCTCATGGAGGAGCTTCTGTTGATTTAGCTATTTTCTCTCTCCATTTAGCTGGAATTTCATCTATTTTAGGAGCTGTAAATTTTATTACAACTGTAATTAACATACGTTCAACAGGAATTACTTTTGATCGAATACCTTTATTTGTTTGATCTGTAGTAATTACAGCTCTATTATTATTATTATCTTTACCAGTTTTAGCTGGAGCTATTACTATATTATTAACAGATCGAAATTTAAATACTTCATTCTTTGATCCTGCTGGAGGAGGAGACCCAATTTTATATCAACATTTATTCTGATTTTTTGGTCACCCTGAAGTTTA
KNWR:Ento:10845	KNWR:Ento:10845	M02696:121:000000000-AP85G:1:1105:21637:17089 1:N:0:226	45	CNGLA035-13	CNGLA035-13	92.3	Insecta	Diptera	Bibionidae	Bibionidae gen. undet.	Bibionidae sp. BOLD:ACG6252	BOLD:ACG6252	BOLD:ACG6252	British Columbia	GGTACTGGATGAACTGTTTACCCTCCCTTATCTAGAACTCTTTCTCATAGAGGGGGGTCTGTTGATTTAGCTATCTTTTCTCTTCATTTAGCCGGTATCTCTTCTATTTTAGGAGCAGTAAATTTTATTACAACTGTAATTAATATACGAGCAATTGGAATTTCATTTGATCGAATGCCTCTTTTTGTATGATCAGTAGTTATTACTGCTATTTTATTACTTCTGTCATTACCAGTATTAGCCGGAGCAATTACTATATTATTAACTGACCGAAATTTAAATACTTCGTTTTTTGACCCAATAGGAGGGGGAGACCCTATTTTATACCAACATTTATTTTGATTTTTTGGTCACCCTGAAGTTTA
KNWR:Ento:10845	KNWR:Ento:10845	M02696:121:000000000-AP85G:1:1107:27265:9583 1:N:0:226	6	NGNAF216-13	NGNAF216-13	95	Insecta	Diptera	Chironomidae	Metriocnemus	Metriocnemus sp. BOLD:ACB8808	BOLD:ACB8808	BOLD:ACB8808	British Columbia	GGAACAGGTTGAACTGTTTATCCTCCTCTTTCTTCTAATATCACTCACGCTGGGGCCTCTGTAGATCTCGCAATTTTTTCTCTTCATTTAGCTGGAGTTTCCTCTATTTTAGGAGCTGTAAATTTCATTACCACCGTTATTAACATACGCTCTGAAGGCATTTCTTTAGATCGTATACCTCTATTTGTTTGATCAGTCGTAATTACAGCTGTTTTATTACTTTTATCCCTCCCAGTTTTAGCGGGTGCCATTACGATACTTCTAACAGACCGGAACTTAAATACTTCTTTTTTTGACCCTGCTGGAGGAGGTGACCCTATTTTATACCAACACTTATTTTGATTTTTTGGTCACCCTGAAGTTTA
KNWR:Ento:10845	KNWR:Ento:10845	M02696:121:000000000-AP85G:1:1112:11339:14897 1:N:0:226	5	CNIVG108-14	CNIVG108-14	92.5	Insecta	Diptera	Chironomidae	Smittia	Smittia sp. ES12	BOLD:AAB0377	BOLD:AAB0377	Yukon Territory	GGAACAGGTTGAACAGTATATCCTCCACTTTCTTCTGGAATTGCTCATGCTGGAGCGTCAGTAGACTTAGCTATTTTTTCATTACATTTAGCTGGTATTTCATCTATTCTAGGAGCCGTAAATTTTATTACTACTGTAATTAATATACGTTCAGAAGGAATTTCATTTGATCGAATACCTTTATTTGTTTGATCAGTTATTATTACAGCTATTTTACTTCTTTTATCTCTTCCTGTCTTAGCCGGAGCTATTACAATACTTTTAACAGATCGAAATTTAAATACCTCATTTTTTGACCCTGCGGGAGGAGGGGATCCTATTTTATACCAACATTTATTTTGATTTTTTGGTCACCCTGAAGTTTA
KNWR:Ento:10845	KNWR:Ento:10845	M02696:121:000000000-AP85G:1:1115:23335:7304 1:N:0:226	5505	CNGLF1148-13	CNGLF1148-13	95.9	Insecta	Diptera	Empididae	Empididae gen. undet.	Empididae sp. BOLD:AAF9792	BOLD:AAF9792	BOLD:AAF9792	British Columbia	GGTACTGGTTGAACAGTTTATCCCCCTCTTTCATCTGGAATTGCTCATGGAGGAGCTTCTGTAGATTTAGCAATTTTTTCACTTCATTTAGCAGGTATTTCTTCTATTTTAGGGGCCGTAAATTTTATTACAACAGTAATTAATATACGAACCCCAGGAATTTCATTTGACCGCATACCTCTATTTGTTTGATCAGTAGTAATTACAGCTATTCTATTATTACTTTTATCTTTACCTGTATTAGCCGGAGCTATTACTATATTATTAACAGATCGAAATTTAAATACTTCATTTTTTGATCCGGCAGGAGGAGGAGACCCTATTTTATATCAACATTTATTTTGATTTTTTGGTCACCCTGAAGTTTA
KNWR:Ento:10845	KNWR:Ento:10845	M02696:121:000000000-AP85G:1:1108:26915:4922 1:N:0:226	1	NGNAS145-14	NGNAS145-14	95.5	Insecta	Diptera	Empididae	Empididae gen. undet.	Empididae sp. BOLD:AAF9792	BOLD:AAF9792	BOLD:AAF9792	British Columbia	TGAACAGGGATGAACTGTATATCCCCCTCTTTCATCTGGAATTGCTCATGGAGGAGCTTCTGTAGATTTAGCAATTTTTTCACTTCATTTAGCAGGTATTTCTTCTATTTTAGGGGCCGTAAATCTTATTACAACAGTAATTAATATACGAACCCCAGGAATTTCATCTGACTATATACGTCTATTTGTTTGATCAGTAGTAATTACAGCTATTCTATTATTACTTTCTTTATCTGTATTAGCCGGAGCTATAAACACAGGAAAAACACAACCAAAGGTAAAGACCACAGGGGGAGAGAAAGCATGAAGACAAGACCATAGGAAAGCACACAAAATAAGAAGATGGTATGGTCACCCTGAAGTTTA
KNWR:Ento:10845	KNWR:Ento:10845	M02696:121:000000000-AP85G:1:2112:26896:5281 1:N:0:226	1	NGNAS145-14	NGNAS145-14	90.1	Insecta	Diptera	Empididae	Empididae gen. undet.	Empididae sp. BOLD:AAF9792	BOLD:AAF9792	BOLD:AAF9792	British Columbia	GGTACAGGATGAACAGTTTATCCTCCTCTTTCATCTGGAATTGCTCATGGAGGAGCTTCTGTAGATTTAGCAATTTTTTCACTTCATTTAGCAGGTATTTCTTCTATTTTAGGGTCCGGAAAGTGTTGGACAACTGTAATGTATTGACGAACCCCAGTAAGGGCATTGTACCGCATACCTCTATTTGTTTGATCAGTAGTAATTACAGCTATTCTATTATTACTTTCTTTACCGGTATTAGCTGGAGCTATTACAATATGATGAACAGAGCGAAAGGGAAAGACGTCAGGTTTGGAGCCGGCAGGAGGAGGAGACCCGAGTGTAGATCAACATGGAGCATCATTTTTTGGTCACCCTGAAGTTTA
KNWR:Ento:10845	KNWR:Ento:10845	M02696:121:000000000-AP85G:1:2113:3831:6169 1:N:0:226	1	NGNAS145-14	NGNAS145-14	93.4	Insecta	Diptera	Empididae	Empididae gen. undet.	Empididae sp. BOLD:AAF9792	BOLD:AAF9792	BOLD:AAF9792	British Columbia	GGTACTGGTTGAACTGTATATCCTCCTCTTTCATCTGGAATTGCTCATGGAGGAGCTTCTGTAGATTTAGCAATTTTTTCACTTCATTTAGCAGGTATTTCTTCTATTTTAGGGGCCGTAAATTTTATTACAACAGTAATTAATATACGAACCCCAGGAATTTCATTTGACCGCATACCGCTATTTGTTTGATCAGTAGTAATTACAGCTATTCTATTATTACTATCACTCCCAGTACTTGCTGGGGCAATCACCATACTACTCACTGATCGGAATATTAATACAACTTTCTTCGACCCAGCTGGTGGGGGGGACCCTATCTTATATCAACATTTATTTTGATTTTTTGGTCACCGTTTA
KNWR:Ento:10845	KNWR:Ento:10845	M02696:121:000000000-AP85G:1:1115:20449:20682 1:N:0:226	4139	BBDCP123-10	BBDCP123-10	95	Insecta	Diptera	Fanniidae	Fannia	Fannia aethiops	BOLD:AAM6399	BOLD:AAM6399	British Columbia	GGAACAGGTTGAACCAGTTTATCCTCCACTATCATCTAACATCGCTCACGGAGGAGCATCCGTAGATCTAGCTATTTTTTCTTTACATTTAGCTGGAATTTCATCAATTTTAGGAGCTGTGAATTTTATCACAACTGTAATTAATATACGAGCTACAGGAATTACATTTGACCGAATACCTTTATTTGTTTGATCTGTAGTAATTACAGCATTATTATTACTTTTATCTTTACCTGTATTAGCCGGAGCTATTACTATATTATTAACAGATCGAAGTATAAATACATCCTTTTTTGACCCTGCAGGAGGAGGAGACCCTATTTTATATCAACATTTATTTTGATTTTTTGGTCACCCTTGAAGTTTA
KNWR:Ento:10845	KNWR:Ento:10845	M02696:121:000000000-AP85G:1:1102:16331:20389 1:N:0:226	6563	DKNWR020-11	DKNWR020-11	92.1	Insecta	Diptera	Fanniidae	Fannia	Fannia serena	BOLD:AAG6901	BOLD:AAG6901	Alaska	GGAACAGGATGAACAGTTTACCCTCCCCCTATCATCTAACATTGCACATGGAGGAGCTTCTGTAGATTTAGCAATTTTCTCTCTTCATTTAGCTGGAATCTCATCTATTTTAGGAGCCGTTAATTTCATTACTACTGTAATTAATATACGCGCTACTGGAATTACATTTGATCGAATACCTTTATTTGTATGATCAGTAGTAATTACAGCATTACTTTTACTTTTATCTTTACCTGTATTAGCAGGAGCTATTACAATATTATTAACAGATCGAAATTTAAATACATCCTTTTTTGACCCTGCAGGAGGAGGAGATCCTATTTTATATCAACATTTATTTTGATTTTTTGGTCACCCTGAAGTTTA
KNWR:Ento:10845	KNWR:Ento:10845	M02696:121:000000000-AP85G:1:1101:7227:15589 1:N:0:226	392	DARC466-11	DARC466-11	93	Insecta	Diptera	Phoridae	Megaselia	Megaselia diversa	BOLD:ACX1594	BOLD:ACX1594	Yukon Territory	GGTACTGGATGAACTGTATATCCTCCTCTTTCATCTAGAATCGCTCATAGTGGAGCTTCAGTAGATTTAGCAATTTTTTCACTTCATTTAGCTGGAATTTCTTCAATTTTAGGAGCTGTAAATTTTATTACTACTATCATTAATATACGATCATCAGGAATTACTTTTGATCGAATACCTTTATTTGTATGATCAGTAGGAATTACTGCTCTATTACTTTTACTTTTATCTTTACCTGTATTAGCAGGAGCTATTACAATATTATTAACAGATCGAAATTTAAATACTTCATTTTTTGACCCAGCTGGAGGAGGAGACCCTATTTTATATCAACATTTATTTTGATTTTTTGGTCACCCTGAAGTTTA
KNWR:Ento:10845	KNWR:Ento:10845	M02696:121:000000000-AP85G:1:2107:22909:17266 1:N:0:226	342	BBDCN415-10	BBDCN415-10	90.1	Insecta	Diptera	Phoridae	Megaselia	Megaselia diversa	BOLD:ACX1594	BOLD:ACX1594	British Columbia	GGTACAGGATGAACTGTATATCCCCCCCTATCATCTAATATTGCTCATGGAGGAGCTTCAGTTGATTTAGCTATTTTTTCTTTACATTTAGCAGGAATTTCTTCAATTTTAGGAGCTGTAAATTTTATTACAACTGTAATTAATATACGATCAACTGGAATTTCATTTGATCGAATACCTTTATTTGTTTGATCTGTAGTAATTACAGCTTTATTATTACTTTTACTTTCACTTCCTGTTTTAGCTGGTGCTATCACAATACTATTAACTGATCGAAATTTCAATACTTCTTTCTTTGACCCAGCTGGTGGAGGAGATCCAATTTTATACCAACATTTATTTTGATTTTTTGGTCACCCTGAAGTTTA
KNWR:Ento:10845	KNWR:Ento:10845	M02696:121:000000000-AP85G:1:1116:8168:7418 1:N:0:226	78	BBDCN415-10	BBDCN415-10	90.6	Insecta	Diptera	Phoridae	Megaselia	Megaselia diversa	BOLD:ACX1594	BOLD:ACX1594	British Columbia	GGAACAGGTTGAACTGTATACCCCCCTCTCTCTGGAAATATTGCTCATGCAGGTCCTAGTGTTGACATATCAATTTTTTCACTACACTTAGCAGGGGTTTCTTCTATCTTAGGAGCGGTAAATTTTATTACTACTATCATTAATATACGATCATCAGGAATTACTTTTGATCGAATACCTTTATTTGTATGATCAGTAGGAATTACTGCTCTATTACTTTTACTTTCACTTCCTGTTTTAGCTGGTGCTATCACAATACTATTAACTGATCGAAATTTCAATACTTCTTTCTTTGACCCAGCTGGTGGAGGAGATCCAATTTTATACCAACATTTATTTTGATTTTTTGGTCACCCTGAAGTTTA
KNWR:Ento:10845	KNWR:Ento:10845	M02696:121:000000000-AP85G:1:2104:17385:17652 1:N:0:226	9	PNAJS108-09	PNAJS108-09	99.1	Insecta	Diptera	Pipunculidae	Pipunculus	Pipunculus hertzogi	BOLD:AAE4793	BOLD:AAE4793	Alaska	GGTACAGGATGAACTGTATATCCCCCCCTATCTTCAAACATTGCACACGGGGGAGCTTCAGTAGATTTAGCAATCTTTTCACTTCACTTAGCCGGAATTTCATCAATTCTTGGTGCTGTAAACTTTATTACAACTGTAATTAATATGCGATCAACAGGAATATCATTTGATCGAATACCTTTATTTGTGTGAGCTGTAGTAATTACAGCCCTTTTATTACTTTTGTCTCTGCCAGTTCTAGCAGGAGCTATTACAATACTTTTAACTGACCGAAATTTTAATACATCATTCTTTGACCCAGCAGGGGGTGGTGATCCTATCTTGTACCAACACCTATTCTGATTTTTTGGTCACCCTGAAGTTTA
KNWR:Ento:10845	KNWR:Ento:10845	M02696:121:000000000-AP85G:1:1119:27229:16875 1:N:0:226	2	SONA649-09	SONA649-09	99.4	Insecta	Diptera	Pipunculidae	Tomosvaryella	Tomosvaryella sp. BOLD:AAG3766	BOLD:AAG3766	BOLD:AAG3766	Alaska	GGAACAGGTTGAACTGTTTATCCTCCTCTATCATCTAATATTGCTCATGAAGGTGCCTCAGTTGACTTAGCAATTTTCTCATTACATTTAGCTGGAATTTCGTCAATTTTGGGAGCTGTAAACTTCATTACTACAGTAATTAATATACGATCTAGAGGAATTTCATTTGACCGAATACCTTTATTTGTATGAGCTGTAGTAATTACTGCTTTATTACTATTGCTATCATTACCAGTATTAGCAGGAGCTATTACTATATTATTAACAGATCGAAATTTTAATACATCATTCTTTGATCCTGCAGGTGGAGGAGACCCAATCTTGTACCAACATTTATTTTGATTTTTTGGTCACCCTGAAGTTTA
KNWR:Ento:10845	KNWR:Ento:10845	M02696:121:000000000-AP85G:1:1107:11773:17789 1:N:0:226	6	CNBRK378-14	CNBRK378-14	98.8	Insecta	Diptera	Scathophagidae	Scathophaga	Scathophaga suilla	BOLD:AAN6699	BOLD:AAN6699	Newfoundland and Labrador	GGTACAGGATGAACTGTTTACCCTCCTCTTTCTGATGGTATATTCCATGATGGTCCCGCTGTTGATTTTGGTATTCTTAGTTTACATATTGCGGGGGTATCCTCTATTTTAGGTGCTATTAATTTTATTGTTACTATTTTTAATATGAAAACAGTCGGTATGTCTTGGTCTATTGTGCCTTTATTCGTCTGATCTGTTTTAATTACTTCTTTTCTTTTAGCCTTTTCTCTTCCTGTTTTAGCTGCTGCTTTAACTATGCTTTTAACAGATCGAAATTTTAACACTACTTTTTTTGACCCAGTAGGTGGGGGGGATCCTATTTTATACCAACATTTGTTCTGATTTTTTGGTCACCCTGAAGTTTA
KNWR:Ento:10845	KNWR:Ento:10845	M02696:121:000000000-AP85G:1:2101:4741:7966 1:N:0:226	14	CNGLF467-13	CNGLF467-13	90.3	Insecta	Diptera	Sciaridae	Sciaridae gen. undet.	Sciaridae sp. BOLD:ABA6443	BOLD:ABA6443	BOLD:ABA6443	British Columbia	GGAACTGGTTGAACAGTTTATCCTCCCTTTATCATCAACTTTGTCCCATTCAGGAGCATCTGTAGATTTATCTATTTTTTCTTTACATTTAGCCGGAATTTCTTCAATTTTAGGGGCAGTAAATTTTATTTCAACAATTATCAATATACGGGCCCCAGGAATAAGATTTGATAAAATACCTTTATTTGTTTGATCTGTTTTAATTACAGCTATTTTATTACTTTTATCTCTTCCTGTTTTAGCAGGAGCTATTACTATATTATTAACTGATCGTAACTTAAATACTTCTTTTTTTGATCCTGCAGGAGGAGGAGACCCAATTTTATACCAACATTTATTTTGATTTTTTGGTCACCCTGAAGTTTA
KNWR:Ento:10845	KNWR:Ento:10845	M02696:121:000000000-AP85G:1:2114:19979:8963 1:N:0:226	182	BBDCN497-10	BBDCN497-10	96.5	Insecta	Diptera	Sepsidae	Sepsis	Sepsis neocynipsea	BOLD:ABY4960	BOLD:ABY4960	British Columbia	CAGGGTACTGGTTGAACTGTATACCCCCCTTTATCTTCAGGTATTGCTCATGGAGGAGCTTCAGTTGATTTAGCAATTTTTTCTCTCCATTTAGCAGGAATTTCTTCTATTTTAGGAGCTGTAAATTTTATTACAACAGTTATTAATATACGATCTACAGGAATTACATTTGATCGAATACCTTTATTTGTATGAGCTGTTGTTATTACTGCACTTCTTTTACTTTTATCATTACCTGTTTTAGCAGGAGCAATTACAATATTATTAACTGATCGAAATTTAAATACCTCATTTTTTGACCCTGCTGGAGGTGGTGACCCAATTCTTTACCAACATTTATTTTGATTTTTTTGGTCACCCTGAAGTTTA
KNWR:Ento:10845	KNWR:Ento:10845	M02696:121:000000000-AP85G:1:1106:13102:14607 1:N:0:226	244	ACBB128-07	ACBB128-07	96.5	Insecta	Diptera	Simuliidae	Simulium	Simulium arcticum complex	BOLD:AAA8954	BOLD:AAA8954	British Columbia	GGTACTGGTTGAACTGTTTATCCTCCCTTATCATCTGGAATTGCCCATGCTGGTGCTTCCGTTGATTTAGCGATTTTTTCACCTCACCTAGCAGGAATCTCATCTATTCTAGGGGCTGTAAATTTTATTACTACAATTATTAATATACGATCTAATGGAATTACTTTTGATCGAATACCGTTATTTGTTTGATCAGTTGTCATTACAGCTGTATTACTACTTTTATCTCTCCCTGTATTAGCTGGAGCTATTACAATACTTCTAACAGATCGAAATTTAAATACATCTTTTTTTGACCCTGCAGGAGGAGGAGACCCTATTCTTTACCAACACTTATTTTGATTTTTTGGTCACCCTGAAAGTTTA
KNWR:Ento:10845	KNWR:Ento:10845	M02696:121:000000000-AP85G:1:1107:22871:4145 1:N:0:226	5	RDBAB1153-10	RDBAB1153-10	92	Insecta	Hemiptera	Aphididae	Macrosiphum	Macrosiphum euphorbiae	BOLD:AAA6213	BOLD:AAA6213	Alaska	GGAACAGGATGAACTGTTTATCCTCCACTATCATCTAACATCGCTCACGGAGGAGCATCCGTAGATCTAGCTATTTTTTCTTTACATTTAGCTGGAATCTCATCAATTTTAGGAGCAATTAATTTTATTTGTACAATTCTTAATATAATACCAAACAATATAAAATTAAATCAAATTCCTCTTTTTCCTTGATCAATTTTAATTACAGCTATTTTACTAATTTTATCTTTACCAGTTTTAGCTGGTGCCATTACAATACTTTTAACTGATCGTAATTTAAATACATCATTTTTTGATCCAGCAGGAGGAGGAGATCCTATTTTATATCAACATTTATTTTGATTTTTTGGTCACCCTGAAGTTTA
KNWR:Ento:10845	KNWR:Ento:10845	M02696:121:000000000-AP85G:1:1113:17300:16662 1:N:0:226	2	CNCHF2119-12	CNCHF2119-12	90.3	Insecta	Hemiptera	Cicadellidae	Euscelis	Euscelis monodens sp. nov	BOLD:ACG7815	BOLD:ACG7815	Yukon Territory	GGTACAGGATGAACTGTTTATCCTCCTCTTTCAAGTAACATTGCCCATTCAGGAGCGAGAGTAGATTTATCTATCTTCTCTCTGCACTTGGCAGGAATTTCTTCAATTTTAGGTGCAGTAAATTTCATTTCAACTGTAATAAATATACGAACGTCAGGGATACTCTTAGACCGCACTCCCCTTTTTGTGTGATCAGTTCTTATTACTGCTATTTTATTACTTCTGTCATTACCAGTATTAGCCGGAGCAATTACTATATTATTAACTGACCGAAATTTAAATACTTCGTTTTTTGACCCAATAGGAGGGGGAGACCCTATTTTATACCAACATTTATTTTGATTTTTTGGTCACCCTGAAGTTTA
KNWR:Ento:10845	KNWR:Ento:10845	M02696:121:000000000-AP85G:1:1103:15901:12121 1:N:0:226	16845	BBHCN362-10	BBHCN362-10	96.2	Insecta	Hemiptera	Cicadellidae	Sonronius	Sonronius dahlbomi	BOLD:AAN8426	BOLD:AAN8426	British Columbia	GGAAGGGTACTGGATGAACAGTTTATCCCCCTCTCTCTGGAAATATTGCTCATGCAGGTCCTAGTGTTGACATATCAATTTTTTCACTACACTTAGCAGGGGTTTCTTCTATCTTAGGAGCAGTAAATTTTATTACAACTGTAATAAATATACGACCTAGAGGTATAACCTTAGACCGAACCCCATTATTTGTATGATCTGTTTTAATTACTGCAGTCCTATTATTACTATCACTCCCAGTACTTGCTGGGGCAATCACCATACTACTCACTGATCGGAATATTAATACAACTTTCTTCGACCCAGCTGGTGGGGGGGACCCTATCTTATACCAACATTTATTTTGATTTTTTGGTCACCCTGAAGTTTA
KNWR:Ento:10845	KNWR:Ento:10845	M02696:121:000000000-AP85G:1:2112:17542:14637 1:N:0:226	108	AHCNC565-13	AHCNC565-13	97.6	Insecta	Hemiptera	Cicadellidae	Twiningia	Twiningia fasciata			British Columbia	GGTACTGGATGAACTGTTTATCCCCCATTATCTAGTAATATTGCTCACGCAGGACCTAGAGTTGATATATCAATCTTTTCATTACACTTAGCAGGAATTTCATCAATTCTAGGGGCAGTAAATTTTATCACAACGGTGATAAATATACGACCTACAGGAATAACTATAGATCGAACCCCTTTATTTGTATGATCAGTTTTAATTACAGCAATTTTATTATTGCTTTCACTACCAGTACTAGCAGGTGCAATTACGATACTATTAACAGATCGAAATATTAACACAACTTTCTTTGACCCAGCGGGAGGTGGGGACCCAATCTTATATCAACACTTATTTTGATTTTTTGGTCACCCCTGAAGTTTA
KNWR:Ento:10845	KNWR:Ento:10845	M02696:121:000000000-AP85G:1:1102:21845:4661 1:N:0:226	1	SSJAF9038-13	SSJAF9038-13	98.5	Insecta	Hemiptera	Miridae	Lygus	Lygus robustus	BOLD:AAG5485	BOLD:AAG5485	Manitoba	GGAACTGGTTGAACAGTTTATCCTCCTCTTTCATCTAATATTGCTCATGCAGGAGCATCTGTTGATCTAGCTATCTTCTCTCTTCATTTAGCAGGTATTTCATCAATTTTAGGAGCTGTAAATTTTATCACTACAATTATTAATATACGAACCGAAGGAATTTCTTTAGACCGAATACCTTTATTTGTTTGATCAGTATTAATTACCGCAATTTTACTTTTATTATCTTTACCTGTATTAGCAGGAGCAATTACTATGCTTTTAACTGATCGAAATTTAAATACTACATTCTTCGACCCTGCTGGAGGGGGGGACCCTATTCTTTATCAACATTTATTTTGATTTTTTGGTCACCCTGAAGTTTA
KNWR:Ento:10845	KNWR:Ento:10845	M02696:121:000000000-AP85G:1:1103:6150:17316 1:N:0:226	2	UAMIC2011-14	UAMIC2011-14	98.2	Insecta	Hemiptera	Miridae	Lygus	Lygus sp. BOLD:ABZ1405	BOLD:ABZ1405	BOLD:ABZ1405	Alaska	GGTACTGGTTGAACTGTTTATCCCCCATTATCAGCAAATATCTCCCATAATGGAACATCAGTAGATTTAGCAATCTTTTCACTTCATCTAGCAGGAGTAAGATCAATTTTAGGAGCAGTAAATTTTATTTCAACAATTATTAACATACGACCTATAGGAATAAATGCAGAACGAATCCCACTATTTGTATGATCAGTAGGAATCACTGCACTACTATTACTTTTATCATTACCTGTATTAGCAGGTGCCATTACTATATTATTAACAGATCGAAATTTTAATACATCATTTTTTGACCCAGCAGGAGGCGGAGATCCAATTCTATATCAACATTTATTTTGATTTTTTGGTCACCCTGAAGTTTA
KNWR:Ento:10845	KNWR:Ento:10845	M02696:121:000000000-AP85G:1:1104:25998:6576 1:N:0:226	3499	UAMIC1935-14	UAMIC1935-14	93.9	Insecta	Hemiptera	Psyllidae	Craspedolepta	Craspedolepta alaskensis	BOLD:ACM1279	BOLD:ACM1279	Alaska	GGAACTGGTTGAACAGTTTACCCTCCACTTTCTAATAGTTCTTTCCATAGAGGATATTCAATTGATATAGCAATTTTTTCACTTCACCTAGCAGGTATTTCTTCTATCCTTGGAGCAATTAACTTTATCACAACAATTCTAAATATACGATCTTCATTGTGTGATTTAGAAAAAATACCCTTATTTGTTTGATCAGTATTAATTACTGCATTTCTTCTACTTTTAGCCCTTCCAGTGCTAGCTGGAGCAATCACTATACTTTTAACAGACCGAAATTTTAATACTTCTTTTTTTGACCCTAGAGGAGGAGGAGGAGACCCTATTTTATACCAACATTTATTTTGATTTTTTGGTCACCCTGAAGTTTA
KNWR:Ento:10845	KNWR:Ento:10845	M02696:121:000000000-AP85G:1:1103:11607:5840 1:N:0:226	6	DUNLP229-08	DUNLP229-08	91.2	Insecta	Lepidoptera	Tortricidae	Argyrotaenia	Argyrotaenia occultana	BOLD:AAA2955	BOLD:AAA2955	British Columbia	GGAACTGGTTGAACAGTATATCCTCCACTTTCATCTAATATTGCTCATAGAGGAAGATCAGTAGATTTAGCAATCTTTTCCCTTCATTTAGCCGGAATTTCATCAATTTTAGGAGCTGTAAATTTTATTACAACTATTATTAATATACGTCCTAATAATATATCTTTAGATCAAATACCTCTATTTGTTTGATCTGTAGGAATTACAGCTTTATTATTACTTTTATCCCTACCTGTATTAGCAGGTGCAATTACCATGTTATTAACAGATCGAAATTTAAATACATCATTTTTTGATCCTGCAGGTGGAGGTGATCCTATTCTTTATCAACATTTATTTTGATTTTTTGGTCACCCTGAAGTTTA
KNWR:Ento:10846	KNWR:Ento:10846	M02696:121:000000000-AP85G:1:1107:16986:20520 1:N:0:227	4012	BBDCM957-10	BBDCM957-10	99.4	Insecta	Diptera	Anthomyiidae	Anthomyiidae gen. undet.	Anthomyiidae sp. BOLD:AAG2469	BOLD:AAG2469	BOLD:AAG2469	British Columbia	GGTACAGGATGAACTGTTTATCCCCCCCCTATCTTCTAACATCGCTCATGGAGGAGCTTCTGTTGATTTAGCTATTTTCTCTCTCCATTTAGCTGGAATTTCATCTATTTTAGGAGCTGTAAATTTTATTACAACTGTAATTAACATACGTTCAACAGGAATTACTTTTGATCGAATACCTTTATTTGTTTGATCTGTAGTAATTACAGCTCTATTATTATTATTATCTTTACCAGTTTTAGCTGGAGCTATTACTATATTATTAACAGATCGAAATTTAAATACTTCATTCTTTGATCCTGCTGGAGGAGGAGACCCAATTTTATATCAACATTTATTCTGATTTTTTGGTCACCCTGAAGTTTA
KNWR:Ento:10846	KNWR:Ento:10846	M02696:121:000000000-AP85G:1:1105:23435:20204 1:N:0:227	42	UAMIC2954-15	UAMIC2954-15	90.3	Insecta	Diptera	Anthomyiidae	Botanophila	Botanophila rubrigena	BOLD:ABX5204	BOLD:ABX5204	Alaska	GGTACTGGATGAACTGTATATCCCCCTTTATCTTCTAATATTGCACACGGTGGAGCTTCTGTTGATTTAGCTATTTTTTCTCTACATTTAGCAGGAATTTCATCTATTTTAGGAGCTGTAAATTTCATTACGACTGTAATTAATATACGATCTACAGGAATTACTTTTGACCGAATACCCTTATTTGTATGATCTGTAGGAATCACAGCACTACTATTACTTTTATCATTACCTGTCCTAGCAGGTGCAATCACCATACTATTAACAGATCGGAATTTTAATACATCATTTTTTGACCCAGCAGGAGGAGGAGACCCAATCCTATATCAACACTTATTTTGATTTTTTGGTCACCCTGAAGTTTA
KNWR:Ento:10846	KNWR:Ento:10846	M02696:121:000000000-AP85G:1:2108:15639:13418 1:N:0:227	2	BBDCP123-10	BBDCP123-10	95	Insecta	Diptera	Fanniidae	Fannia	Fannia aethiops	BOLD:AAM6399	BOLD:AAM6399	British Columbia	GGAACTGGATGAACAGTATACCCCCCACTATCATCTAACATCGCTCACGGAGGAGCATCCGTAGATCTAGCTATTTTTTCTTTACATTTAGCTGGAATTTCATCAATTTTAGGAGCTGTGAATTTTATCACAACTGTAATTAATATACGAGCTACAGGAATTACATTTGACCGAATACCTTTATTTGTTTGATCTGTAGTAATTACAGCATTATTATTACTTTTATCTTTACCTGTATTAGCCGGAGCTATTACTATATTATTAACAGATCGAAATATAAATACATCCTTTTTTGACCCTGCAGGAGGAGGAGATCCTATTTTATATCAACATTTATTTTGATTTTTTGGTCACCCTGAAGTTTA
KNWR:Ento:10846	KNWR:Ento:10846	M02696:121:000000000-AP85G:1:1101:18970:19578 1:N:0:227	13	DKNWR024-11	DKNWR024-11	98.2	Insecta	Diptera	Lauxaniidae	Lauxania	Lauxania shewelli	BOLD:AAH3531	BOLD:AAH3531	Alaska	GGAACAGGTTGAACAGTATATCCTCCGCTATCTTCTGGAATCGCCCATGGAGGTGCCTCAGTTGACTTAGCAATTTTTAGACTTCATTTAGCCGGAGTATCTTCAATTTTAGGGGCCGTAAATTTTATTACTACTGTAATCAATATACGATCTACTGGAATTACTTTCGACCGAATACCTTTATTTGTATGATCAGTAGTAATTACAGCTCTTTTATTACTTTTATCTCTACCCGTATTAGCTGGAGCCATTACAATATTACTAACTGATCGAAATTTAAACACCTCATTCTTTGACCCAGCTGGAGGAGGAGACCCTATTCTTTATCAACATTTATTTTGATTTTTTGGTCACCCTGAAGTTTA
KNWR:Ento:10846	KNWR:Ento:10846	M02696:121:000000000-AP85G:1:1107:13063:19763 1:N:0:227	8	BBDCN411-10	BBDCN411-10	94.1	Insecta	Diptera	Phoridae	Phoridae gen. undet.	Phoridae sp. BOLD:AAL9069	BOLD:AAL9069	BOLD:AAL9069	British Columbia	GGAACTGGATGAACAGTATACCCCCCTCTTTCTTCTAGAATCGCTCATAGTGGAGCTTCAGTAGATTTAGCAATTTTCTCATTACATTTAGCTGGTATTTCTTCAATTTTAGGAGCTGTAAATTTTATTACTACTATTATTAATATACGTTCATCAGGAATTACTTTTGATCGAATACCTTTATTTGTATGATCTGTAGGAATTACTGCTTTATTACTTTTACTTTCACTTCCTGTATTAGCAGGAGCTATTACTATACTTTTAACAGATCGAAATTTTAATACTTCTTTTTTTGATCCTGCTGGAGGAGGAGATCCTATTTTATATCAACATTTATTTTGATTTTTTGGTCACCCTGAAGTTTA
KNWR:Ento:10846	KNWR:Ento:10846	M02696:121:000000000-AP85G:1:1105:12055:2565 1:N:0:227	46	PNAJS109-09	PNAJS109-09	99.7	Insecta	Diptera	Pipunculidae	Pipunculus	Pipunculus campestris	BOLD:AAD0917	BOLD:AAD0917	Alaska	GGTACAGGTTGAACTGTTTATCCTCCCCTATCTTCAAATATTGCACACGGTGGAGCTTCAGTAGACTTAGCAATTTTTTCGCTACATCTAGCTGGAATTTCGTCAATTCTTGGGGCTGTAAACTTTATTACAACTGTTATTAATATACGGTCAGCAGGGATATCATTTGATCGAATGCCTTTATTTGTTTGAGCTGTAGTAATTACAGCTCTTTTATTACTTCTGTCTCTTCCAGTCCTAGCAGGGGCTATCACAATGCTTTTAACTGACCGAAATTTCAATACATCATTCTTTGATCCTGCAGGAGGTGGAGACCCGATCTTGTATCAACACCTATTCTGATTTTTTTGGTCACCCTGAAGTTTA
KNWR:Ento:10846	KNWR:Ento:10846	M02696:121:000000000-AP85G:1:1110:26527:17481 1:N:0:227	51	PNAJS108-09	PNAJS108-09	97.9	Insecta	Diptera	Pipunculidae	Pipunculus	Pipunculus hertzogi	BOLD:AAE4793	BOLD:AAE4793	Alaska	GGAACTGGGTTGAACTGTTTATCCTCCCCTATCTTCAAACATTGCACACGGGGGAGCTTCAGTAGATTTAGCAATCTTTTCACTTCACTTAGCCGGAATTTCATCAATTCTTGGTGCTGTAAACTTTATTACAACTGTAATTAATATGCGATCAACAGGAATATCATTTGATCGAATACCTTTATTTGTGTGAGCTGTAGTAATTACAGCCCTTTTATTACTTTTGTCTCTGCCAGTTCTAGCAGGAGCTATTACAATACTTTTAACTGACCGAAATTTTAATACATCATTCTTTGACCCAGCAGGGGGTGGTGATCCTATCTTGTACCAACACCTATTCTGATTTTTTGGTCACCCTGAAGTTTA
KNWR:Ento:10846	KNWR:Ento:10846	M02696:121:000000000-AP85G:1:1109:28602:8239 1:N:0:227	4	CNCDF557-11	CNCDF557-11	97.9	Insecta	Diptera	Pipunculidae	Tomosvaryella	Tomosvaryella sp. BOLD:AAG1659	BOLD:AAG1659	BOLD:AAG1659	Alaska	GGTACAGGTTGAACTGTTTATCCTCCTCTATCTTCTAATATTGCTCATGGAGGAGCATCTGTTGATTTAGCAATTTTTTCATTACATTTAGCTGGTATTTCATCAATTCTAGGTGCTGTAAATTTTATTACAACAGTAATTAATATACGATCAATAGGAATTTCATTTGATCGAATACCTCTATTTGTATGAGCAGTAGTAATTACAGCTTTATTATTATTATTATCACTACCAGTATTAGCAGGTGCTACTGCAATATTATTAACAGATCGAAATTTCAATACATCATTCTTTGATCCCGCTGGAGGAGGTGATCCTATTCTTTATCAACATTTATTCTGATTTTTTGGTCACCCTGAAGTTTA
KNWR:Ento:10846	KNWR:Ento:10846	M02696:121:000000000-AP85G:1:1101:17867:19449 1:N:0:227	15	SONA649-09	SONA649-09	98.8	Insecta	Diptera	Pipunculidae	Tomosvaryella	Tomosvaryella sp. BOLD:AAG3766	BOLD:AAG3766	BOLD:AAG3766	Alaska	GGAACTGGTTGAACTGTATATCCCCCCTCTATCATCTAATATTGCTCATGAAGGTGCCTCAGTTGACTTAGCAATTTTCTCATTACATTTAGCTGGAATTTCATCAATTTTGGGAGCTGTAAACTTCATTACTACAGTAATTAATATACGATCTAGAGGAATTTCATTTGACCGAATACCTTTATTTGTATGAGCTGTAGTAATTACTGCTTTATTACTATTGCTATCATTACCAGTATTAGCAGGAGCTATTACTATATTATTAACAGATCGAAATTTTAATACATCATTCTTTGATCCTGCAGGTGGAGGAGACCCAATCTTGTACCAACATTTATTTTGATTTTTTGGTCACCCTGAAGTTTA
KNWR:Ento:10846	KNWR:Ento:10846	M02696:121:000000000-AP85G:1:2107:25822:19724 1:N:0:227	10	DKNWR029-11	DKNWR029-11	93.5	Insecta	Diptera	Rhagionidae	Symphoromyia	Symphoromyia sp. BOLD:AAP6399	BOLD:AAP6399	BOLD:AAP6399	Alaska	GGTACAGGATGAACAGTTTATCCCCCATTATCAGCCAATATAGCACATAATGGAGCTTCTGTAGATCTAGCTATTTTTTCATTACATTTAGCTGGAATTTCTTCTATTTTAGGAGCAGTAAATTTTATTACAACAGTAATTAATATACGATCAACAGGTATTTCATTTGATCGAATACCTTTATTCGTATGAGCTGTTGTAATTACAGCTATTCTTTTATTGTTATCTTTACCTGTATTAGCGGGAGCTATTACAATACTATTAACAGATCGAAATTTAAATACTTCATTCTTTGATCCGGCAGGAGGGGGAGACCCTATTTTATATCAACATTTATTTTGATTTTTTGGTCACCCTGAAGTTTA
KNWR:Ento:10846	KNWR:Ento:10846	M02696:121:000000000-AP85G:1:1110:17305:12456 1:N:0:227	562	BBDCN994-10	BBDCN994-10	96.2	Insecta	Diptera	Scathophagidae	Scathophaga	Scathophaga furcata	BOLD:ACX4405	BOLD:ACX4405	British Columbia	GGAACAGGTTGAACTGTATACCCTCCTTTATCTTCAAATATTGCTCACGGAGGAGCTTCTGTTGATTTAGCAATTTTTTCTCTTCATTTAGCTGGAATTTCATCTATTTTAGGGGCTGTAAATTTTATCACAACTGTAATTAATATACGATCAACAGGAATTACTTTCGATCGAATACCTTTATTTGTATGATCTGTAGTAATTACAGCTTTATTGCTTCTTTTATCTTTACCAGTTTTAGCCGGAGCTATTACTATATTATTAACTGATCGAAATCTTAATACATCATTTTTTGACCCTGCAGGAGGAGGAGATCCAATTTTATACCAACATTTATTTTGATTTTTTGGTCACCCCTGAAGTTTA
KNWR:Ento:10846	KNWR:Ento:10846	M02696:121:000000000-AP85G:1:1106:12355:19748 1:N:0:227	16	ACB1044-06	ACB1044-06	98.5	Insecta	Diptera	Simuliidae	Simulium	Simulium venustum complex	BOLD:AAA4264	BOLD:AAA4264	Yukon Territory	GGTACAGGTTGAACAGTATATCCTCCCCTATCTTCTGGAATTGCTCATGCTGGGGCATCCGTTGATTTAGCTATTTTTTCACTTCATTTAGCGGAAATTTCTTCTATTTTAGGGGCTGTTAATTTTATTACAACTATTATTAATATACGATCAAATGGAATTACTTTTGACCGAATGCCTTTATTTGTATGATCAGTTGTTATTACAGCTGTATTATTACTTCTGTCACTTCCTGTTTTAGCAGGAGCTATTACAATACTTTTAACAGATCGGAACTTAAATACGTCTTTCTTCGACCCCGCAGGAGGAGGAGACCCTATTCTTTATCAACATTTATTTTGATTTTTTGGTCACCCTGAAGTTTA
KNWR:Ento:10846	KNWR:Ento:10846	M02696:121:000000000-AP85G:1:1110:14663:15067 1:N:0:227	1	UAMU058-14	UAMU058-14	98.8	Insecta	Diptera	Syrphidae	Hiatomyia	Hiatomyia sp. BOLD:AAZ5940	BOLD:AAZ5940	BOLD:AAZ5940	Alaska	AGAACTGGATGAACTGTATACCCTCCTCTTTCTGCTAGTATTGCTCATGGTGGAGCCTCAGTAGATTTAGCTATTTTTTCATTACATTTAGCAGGTATATCATCTATTTTAGGGGCAGTAAATTTTATTACTACAGTAATTAATATACGATCTACTGGAATCTCATATGATCGAATACCTTTATTTGTATGATCAGTTGTAATTACAGCTCTTCTTCTTTTATTATCTTTACCTGTTTTAGCTGGAGCAATTACTATATTATTAACAGACCGAAACTTAAATACTTCTTTCTTTGATCCAGCTGGAGGAGGAGATCCTATTTTATATCAACATTTATTTTGATTTTTTGGTCACCCTGAAGTTTA
KNWR:Ento:10846	KNWR:Ento:10846	M02696:121:000000000-AP85G:1:2101:22727:13917 1:N:0:227	325	NGNAP094-14	NGNAP094-14	90	Insecta	Diptera	Tachinidae	Madremyia	Madremyia saundersii	BOLD:AAX3393	BOLD:AAX3393	British Columbia	GGTACAGGATGAACAGTTTATCCCCCCTTTATCATCTAATATTGCTCATGGAGGAGCCTCAGTTGATTTAGCTATTTTTTCTTTACATTTAGCTGGAATTTCTTCAATTCTAGGAGCTGTAAATTTTATTACAACAGTAATTAATATACGATCAACAGGAATTACATTTGACCGGATACCTTTATTTGTTTGATCAGTAGTTATTACAGCTTTATTATTATTATTATCTTTACCTGTTTTAGCAGGAGCAATTACAATATTATTAACGGATCGAAATTTAAATACTTCGTTTTTTGATCCAGCTGGAGGTGGTGACCCTATTCTTTACCAACACTTATTTTGATTTTTTGGTCACCCTGAAGTTTA
KNWR:Ento:10846	KNWR:Ento:10846	M02696:121:000000000-AP85G:1:1111:21061:12838 1:N:0:227	1	SATIP022-08	SATIP022-08	97.3	Insecta	Diptera	Tipulidae	Prionocera	Prionocera turcica	BOLD:ACE4050	BOLD:ACE4050	Alaska	GGAACAGGATGAACAGTTTACCCCCCTCTTTCATCAAGAATTGCCCATACAGGAGCTTCAGTTGATTTAGCTATTTTTTCTCTTCACTTAGCGGGAATTTCTTCAATTTTAGGTGCTGTAAATTTTATTACTACAGTTATTAATATACGATCAAGAGGAATTACATTAGATCGAATGCCCCTGTTTGTTTGATCAGTAGTAATTACAGCAGTTCTTTTATTATTATCTTTACCAGTACTAGCAGGAGCTATTACTATACTTTTAACAGATCGAAATTTAAATACTTCTTTTTTTGATCCATCAGGAGGAGGAGACCCAATTTTATATCAACATTTATTTTGATTTTTTGGTCACCCTGAAGTTTA
KNWR:Ento:10846	KNWR:Ento:10846	M02696:121:000000000-AP85G:1:1103:24539:20579 1:N:0:227	51	CNCHF1171-12	CNCHF1171-12	98.5	Insecta	Hemiptera	Cicadellidae	Diplocolenus	Diplocolenus evansi			Yukon Territory	GGTACTGGTTGAACTGTTTATCCCCCTCTATCAAGAAATATCGCACATGCAGGTGTTAGAGTCGATATATCAATTTTCTCCTTACATCTAGCAGGGATTTCCTCAATCCTAGGGGCGGTAAACTTTATTTCAACCGTTATAAATATACGACCTGCAGGAATAACATTGGATCGAACACCGCTATTCGTATGGTCTGTTCTTATTACCGCAGTTTTACTTCTTTTATCTCTACCAGTATTAGCAGGAGCTATTACTATACTATTAACTGACCGAAATATTAACACAACATTTTTTGACCCTGCCGGAGGAGGGGACCCAATTTTATACCAACACCTATTTTGATTTTTTGGTCACCCTGAAGTTTA
KNWR:Ento:10846	KNWR:Ento:10846	M02696:121:000000000-AP85G:1:2119:26933:10578 1:N:0:227	1	CNCHF856-12	CNCHF856-12	97.9	Insecta	Hemiptera	Cicadellidae	Latalus	Latalus tatraensis			Yukon Territory	GGAACTGGATGAACAGTTTACCCTCCTCTATCAAGAAACATTGCACATGCTGGAGTGAGTGTAGACATATCAATTTTTTCATTACACTTAGCAGGAATTTCTTCAATCCTTGGAGCAGTAAACTTTATCTCAACTGTTATAAATATACGACCTGCTGGAATAACTTTAGACCGAACACCTTTATTTGTTTGATCTGTTTTAATTACTGCTGTACTTTTACTTCTATCTTTACCTGTACTAGCAGGAGCTATTACAATACTTTTAACTGATCGAAATATCAATACAACATTTTTTGACCCTGCAGGAGGAGGTGACCCAATCTTATATCAACATTTATTTTGATTTTTTGGTCACCCTGAAGTTTA
KNWR:Ento:10846	KNWR:Ento:10846	M02696:121:000000000-AP85G:1:2106:20692:12768 1:N:0:227	32366	BBHCN362-10	BBHCN362-10	94.3	Insecta	Hemiptera	Cicadellidae	Sonronius	Sonronius dahlbomi	BOLD:AAN8426	BOLD:AAN8426	British Columbia	GGAAGACAGGGAACTGGTTGAACTGTTTATCCTCCTCTCTCTGGAAATATTGCTCATGCAGGTCCTAATGTTGACATATCAATTTTTTCACTACACTTAGCAGGGGTTTCTTCTATCTTAGGAGCAGTAAATTTTATTACAACTGTAATAAATATACGACCTAGAGGTATAACCTTAGACCGAACCCCATTATTTGTATGATCTGTTTTAATTACTGCAGTCCTATTATTACTATCACTCCCAGTACTTGCTGGGGCAATTACCATACTACTCACTGATCGGAATATTAATACAACTTTCTTCGACCCAGCTGGTGGGGGGGACCCTATCTTATACCAACATTTGTTTTGATTTTTTGGTCACCCTGAAGTTTA
KNWR:Ento:10846	KNWR:Ento:10846	M02696:121:000000000-AP85G:1:1101:5074:15581 1:N:0:227	273	BBHCN220-10	BBHCN220-10	90.3	Insecta	Hemiptera	Cicadellidae	Sonronius	Sonronius dahlbomi	BOLD:AAN8426	BOLD:AAN8426	British Columbia	GGTACAGGTTGAACAGTTTATCCCCCTTTATCATCTAATATTGCTCATGGAGGAGCCTCAGTTGATTTAGCTATTTTTTCTTTACCTTTAGCTGGAATTTCTTCAATTCTAGGAGCTGTAAATTTTATTACAACTGTAATAAACATACGACCTAGAGGTATAACCTTAGACCGAACCCCATTATTTGTATGATCTGTTTTAATTACTGCAATCCTATTATTACTATCACTTCCAGTACTTGCTGGGGCAATCACTATACTACTTACTGATCGGAATATTAATACAACTTTCTTCGACCCAGCTGGTGGGGGGGACCCTATCTTATATCAACATTTATTTTGATTTTTTGGTCACCCTGAAGTTTA
KNWR:Ento:10846	KNWR:Ento:10846	M02696:121:000000000-AP85G:1:2118:9874:23258 1:N:0:227	6553	UAMIC2159-14	UAMIC2159-14	95.9	Insecta	Hemiptera	Miridae	Irbisia	Irbisia sericans	BOLD:AAZ2844	BOLD:AAZ2844	Alaska	GGTACTGGTTGAACAGTATACCCTCCATTATCAGCCAATATAGCCCATGATGGAGCTTCTGTAGATCTAGCTATTTTTTCATTACACTTAGCAGGAGTATCATCAATTTTAGGAGCAGTAAACTTTATCTCAACAATCATCAACATGCGACCAGCTGGAATAACAGCAGAACGTATCCCCTTATTTGTATGATCCGTAGGAATCACAGCACTACTATTACTTTTATCATTACCTGTCCTAGCAGGTGCAATCACCATATTATTAACAGATCGGAATTTTAATACATCATTTTTTGACCCAGCAGGAGGAGGAGGAGACCCAATCCTATATCAACCCTTATTTTGATTTTTTGGTCAACCTGAAGTTTA
KNWR:Ento:10846	KNWR:Ento:10846	M02696:121:000000000-AP85G:1:2101:11127:7416 1:N:0:227	21	CNCHC819-11	CNCHC819-11	91.2	Insecta	Hemiptera	Miridae	Irbisia	Irbisia sericans	BOLD:AAZ2844	BOLD:AAZ2844	Alaska	GGAACAGGTTGAACAGTATATCCCCCATTATCAGCCAATATAGCACATAATGGAGCTTCTGTAGATCTAGCTATTTTTTCATTACACTTAGCAGGAGTATCATCAATTCTAGGGGCAGTAAACTTTATCTCAACAATCATCAACATGCGGCCAGCTGGAATAACGGCAGAACGTATCCCCTTATTTGCATGATCCGTAGGAATCACAGCACTATTATTATTATTATCTTTAACAGTTTTAGCTGGAGCTATTACTATATTATTAACAGATCGAAATTTAAATACTTCATTCTTTGATCCTGCTGGAGGAGGAGACCCAATTTTATATCAACATTTATTCTGATTTTTTGGTCACCCTGAAGTTTA
KNWR:Ento:10846	KNWR:Ento:10846	M02696:121:000000000-AP85G:1:1110:19536:18390 1:N:0:227	106	CNCHA1661-11	CNCHA1661-11	98.5	Insecta	Hemiptera	Miridae	Mecomma	Mecomma gilvipes	BOLD:AAZ6451	BOLD:AAZ6451	Alaska	GGTACAGGTTGAACTGTTTATCCTCCCCCTTTCAGGAAATATATCCCACAATGGAAGATGTGTAGATATAGCAATTTTCTCACTCCATCTAGCCGGAATTTCATCTATTTTAGGAGCAGTAAATTTTATTTCAACAATCTTGAACATACGATCAACAGGTATAACTTTAGAGCAAATCCCATTATTTGTTTGATCTGTAGGAATTACAGCTCTACTTTTATTATTATCGCTACCTGTCCTAGCAGGGGCTATCACCATATTATTAACAGATCGAAACTTCAACACATCTTTCTTTGACCCTGCAGGAGGGGGAGATCCCATCCTTTATCAACATTTATTTTGATTTTTTGGTCACCCTGAAGTTTA
KNWR:Ento:10846	KNWR:Ento:10846	M02696:121:000000000-AP85G:1:1101:9070:9773 1:N:0:227	86	UAMIC1935-14	UAMIC1935-14	90.6	Insecta	Hemiptera	Psyllidae	Craspedolepta	Craspedolepta alaskensis	BOLD:ACM1279	BOLD:ACM1279	Alaska	GGTACAGGATGAACTGTTTATCCCCCTCTCTCTGGAAATATTGCTCATGCAGGTCCTAGTGTTGATATATCAATCTTTTCACTACACTTAGCGGGAATTTCTTCTATCCTTGGAGCAATCAACTTTATTACAACAATTTTAAATATACGATCTTCATTGTGTGATTTAGAAAAGATACCCTTGTTTGTTTGATCAGTATTAATTACTGCATTTCTTCTCCTTTTAGCCCTTCCAGTACTAGCTGGAGCAATCACTATACTTTTAACTGACCGAAATTTTAATACTTCTTTTTTTGATCCTAGAGGTGGGGGAGACCCTATTTTATACCAACATTTATTCTGATTTTTTGGTCACCCTGAAGTTTA
KNWR:Ento:10846	KNWR:Ento:10846	M02696:121:000000000-AP85G:1:2105:10726:23247 1:N:0:227	21	UAMIC1935-14	UAMIC1935-14	92.6	Insecta	Hemiptera	Psyllidae	Craspedolepta	Craspedolepta alaskensis	BOLD:ACM1279	BOLD:ACM1279	Alaska	GGAACTGGTTGAACTGTATACCCCCCACTTTCTAATAGTTCTTTCCATAGAGGATACTCAATTGATATAGCAATTTTTTCACTTCACCTGGCAGGAATTTCTTCTATCCTTGGAGCAATCAACTTTATTACAACAATTTTAAATATACGATCTTCATTGTGTGATTTAGAAAAGATACCCTTGTTTGTTTGATCAGTATTAATTACTGCATTTCTTCTCCTTTTAGCCCTTCCAGTACTAGCTGGAGCAATCACTATACTACTCACTGATCGGAATATTAATACAACTTTCTTCTACCCAGCTGGTGGGGGGGACCCTATCTTATACCAACATTTGTTTTGATTTTTTGGTCACCCTGAAGTTTA
KNWR:Ento:10846	KNWR:Ento:10846	M02696:121:000000000-AP85G:1:2107:6580:4378 1:N:0:227	259	SIOCA067-10	SIOCA067-10	90	Insecta	Hemiptera	Psyllidae	Craspedolepta	Craspedolepta subpunctata	BOLD:AAP4550	BOLD:AAP4550	British Columbia	GGTACAGGATGAACTGTATATCCTACACTTTCTAATAGTTCTTTTCATAGAGGATATTCAATTGATATAGCAATTTTTTCGCTTTACATAGCAGGAATTTCTTCTATCCTTGGAGCGATTAACTTTATCACAACAATTCTAAATATACGATCTTCATTGTGTGATTTAGAAAAAATACCCTTATTTGTATGATCAGTATTAATTACTGCATTTCTTCTACTTTTGGCTCTTCCAGTGTGCTAGCTGGAGCAATCACTATACTTTTTACAGATCGAAATTTTAATACTTCTTTTTTTGACCCGAGAGGAGGAGGAGACCCTAGTTTATACCAACATTTATTTTGATTTTTTGGTCACCCTGAAGTTTA
KNWR:Ento:10846	KNWR:Ento:10846	M02696:121:000000000-AP85G:1:1101:4048:12608 1:N:0:227	2250	UAMIC1922-14	UAMIC1922-14	98.2	Insecta	Hemiptera	Psyllidae	Craspedolepta	Craspedolepta subpunctata	BOLD:AAV0232	BOLD:AAV0232	Alaska	GGTACAGGATGAACTGTTTACCCTCCCCCCTATCTAATAGTGCTTTTCACAGAGGATACTCAATTGATATAGCAATTTTCTCGCTACATCTTGCAGGAATTTCTTCTATTCTAGGAGCAATTAATTTCATTACTACAATTTTAAATATACGATCTTCATTATGTGATTTAGAAAAATTACCCTTATTTGTTTGATCTGTATTAATTACTGCATTTCTTTTACCTTTAGCCCTCCCAGTATTAGCAGGAGCGATTACAATACTCTTAACAGACCGAAATTTTAACACCTCATTTTTTGATCCTAGAGGGGGAGGGGATCCTATTTTATACCAACATTTATTCTGATTTTTTGGTCACCCTGAAATTTA
KNWR:Ento:10846	KNWR:Ento:10846	M02696:121:000000000-AP85G:1:2104:22869:7895 1:N:0:227	1	BBHYI529-10	BBHYI529-10	95.6	Insecta	Hymenoptera	Ichneumonidae	Scambus	Scambus deceptor	BOLD:AAG7626	BOLD:AAG7626	British Columbia	GGTACTGGTTGAACTGTTTATCCTCCTCTATCTTTAAATTTAAATCATGAAGGATTATCAGTTGATTTAGCAATTTTTTCTTTACATATAGCTGGTATATCATCTATTATAGGAGCCATTAATTTTATTACTACAATTATAAATATACGACCTAATATAATCACCTTAGAAAAAATATCCTTATTTACTTGATCAATTAAAATTACTGCTATTTTACTTTTATTAGCTGTTCCTGTTTTAGCTGGCGCTATCACTATATTATTAACTGATCGAAATTTAAATACTTCATTCTTTGACCCATCTGGAGGAGGAGATCCAATTTTATATCAACATTTATTTTGATTTTTTGGTCACCCTGAAGTTTA
KNWR:Ento:10846	KNWR:Ento:10846	M02696:121:000000000-AP85G:1:1104:4729:20126 1:N:0:227	529	MNAN1047-14	MNAN1047-14	95.9	Insecta	Lepidoptera	Plutellidae	Plutella	Plutella hyperboreella	BOLD:AAC3387	BOLD:AAC3387	Yukon Territory	GGTACTGGATGAACAGTTTACCCTCCCACTTTCATCTAATATCGCTCATAGAGGAAGATCAGTTGATTTAGCTATTTTTTCACTTCATTTAGCTGGTATTTCATCAATTTTAGGAGCAATTAACTTCATTACTACTATTATTAACATAAAAAGAAATGGTATATCATTTGATCGTATACCTTTATTTGTTTGAGCTGTAGGAATTACAGCTGTATTATTATTATTATCTTTACCTGTATTAGCAGGTGCTATTACTATATTATTAACAGATCGAAATTTAAATACTTCTTTTTTTGATCCTGCAGGAGGAGGAGATCCTATTTTATATCAACATTTATTTTGATTTTTTGGTCACCCTGAAGTTTA
KNWR:Ento:10846	KNWR:Ento:10846	M02696:121:000000000-AP85G:1:1107:26666:15913 1:N:0:227	7	GBHS5989-10	GBHS5989-10	96.5	Mammalia	Primates	Homonidae	Homo	Homo sapiens	BOLD:AAA0001	BOLD:AAA0001	Quebec	GGAACTGGATGAACAGTTTATCCCCCCTTAGCAGGGAACTACTCCCACCCTGGAGCCTCCGTAGACCTAACCATCTTCTCCTTACACCTAGCAGGTGTCTCCTCTATCTTAGGGGCCATCAATTTCATCACAACAATTATCAATATAAAACCCCCTGCCATAACCCAATACCAAACGCCCCTCTTCGTCTGATCCGTCCTAATCACAGCAGTCCTACTTCTCCTATCTCTCCCAGTCCTAGCTGCTGGCATCACTATACTACTAACAGACCGCAACCTCAACACCACCTTCTTCGACCCCGCCGGAGGAGGAGACCCCATTCTATACCAACACCTATTCTGATTTTTTGGTCACCCTGAAGTTTA
KNWR:Ento:10847	KNWR:Ento:10847	M02696:121:000000000-AP85G:1:1102:20999:5498 1:N:0:228	2	BBCCN628-10	BBCCN628-10	98.8	Insecta	Coleoptera	Chrysomelidae	Altica	Altica tombacina	BOLD:AAG3656	BOLD:AAG3656	British Columbia	GGTACTGGTTGAACAGTTTACCCTCCATTATCTTCTAATCTTGCACATAACGGCCCATCTGTTGATTTAGCTATTTTCAGTCTTCATTTAGCAGGAATTTCATCAATTTTAGGGGCTATTAATTTTATTACAACAATAATTAATATACGACCGCAAGGAATATCAATAGACCAAATACCTCTATTTGTATGAGCAGTATTTATTACAGCCATCCTTTTACTTTTATCCTTACCAGTTCTAGCTGGTGCAATTACAATATTACTTACAGATCGTAATTTAAATACATCTTTTTTTGAACCAGCCGGTGGAGGAGACCCAATTCTCTATCAACATCTATTTTGATTTTTTGGTCACCCTGAAGTTTA
KNWR:Ento:10847	KNWR:Ento:10847	M02696:121:000000000-AP85G:1:1101:26199:5054 1:N:0:228	5338	BBDCM957-10	BBDCM957-10	98	Insecta	Diptera	Anthomyiidae	Anthomyiidae gen. undet.	Anthomyiidae sp. BOLD:AAG2469	BOLD:AAG2469	BOLD:AAG2469	British Columbia	GGAACAGGTTGAACTGTATACCCCCCCCTATCTTCTAACATCGCTCATGGAGGAGCTTCTGTTGATTTAGCTATTTTCTCTCTCCATTTAGCTGGAATTTCATCTATTTTAGGAGCTGTAAATTTTATTACAACTGTAATTAACATACGTTCAACAGGAATTACTTTTGATCGAATACCTTTATTTGTTTGATCTGTAGTAATTACAGCTCTATTATTATTATTATTATCTTTACCAGTTTTAGCTGGAGCTATTACTATATTATTAACAGATCGAAATTTAAATACTTCATTCTTTGATCCTGCTGGAGGAGGAGACCCAATTTTATATCAACATTTATTCTGATTTTTTGGTCACCCTGAAGTTTA
KNWR:Ento:10847	KNWR:Ento:10847	M02696:121:000000000-AP85G:1:1105:4976:12469 1:N:0:228	9	UAMIC1215-13	UAMIC1215-13	98.2	Insecta	Diptera	Anthomyiidae	Hylemya	Hylemya variata	BOLD:AAG2478	BOLD:AAG2478	Alaska	GGTACTGGATGAACTGTTTATCCCCCTCTATCTTCTAATATTGCACATGGAGGAGCTTCTGTAGATATAGCAATTTTTTCTTTACATTTAGCAGGAATTTCATCAATTTTAGGTGCTGTAAATTTTATTACTACAGTAATTAATATGCGATCAACAGGAATTACTTTTGATCGAATACCTCTATTTGTATGGTCAGTAGTAATTACAGCTTTACTACTTCTATTATCTCTACCAGTTTTAGCTGGTGCAATTACTATATTACTAACAGATCGAAATTTAAATACTTCATTTTTTGATCCAGCAGGAGGAGGAGACCCAATTTTATATCAACATCTATTTTGATTTTTTGGTCACCCTGAAGTTTA
KNWR:Ento:10847	KNWR:Ento:10847	M02696:121:000000000-AP85G:1:2113:18141:25081 1:N:0:228	2	CNGLA035-13	CNGLA035-13	92.9	Insecta	Diptera	Bibionidae	Bibionidae gen. undet.	Bibionidae sp. BOLD:ACG6252	BOLD:ACG6252	BOLD:ACG6252	British Columbia	GGAACAGGTTGAACTGTTTACCCTCCCTTATCTAGAACTCTTTCTCATAGAGGGGGGTCTGTTGATTTAGCTATCTTTTCTCTTCATTTAGCCGGTATCTCTTCTATTTTAGGAGCAGTAAATTTTATTACAACTGTAATTAATATACGAGCAATTGGAATTTCATTTGATCGAATGCCTCTTTTTGTATGATCAGTAGTTATTACTGCTATTTTATTACTTCTGTCATTACCAGTATTAGCCGGAGCAATTACTATATTATTAACTGACCGAAATTTAAATACTTCGTTTTTTGACCCAATAGGAGGGGGAGACCCTATTTTATACCAACATTTATTTTGATTTTTTGGTCACCCTGAAGTTTA
KNWR:Ento:10847	KNWR:Ento:10847	M02696:121:000000000-AP85G:1:1108:11240:12577 1:N:0:228	14102	CNIVE158-14	CNIVE158-14	90.5	Insecta	Diptera	Chironomidae	Metriocnemus	Metriocnemus sp. BOLD:ACJ5126	BOLD:ACJ5126	BOLD:ACJ5126	Yukon Territory	GGTACTGGTTGAACTGTATATCCTCCCCACTATCTTCTGGAATTGCCCATACAGGAGGTTCTGTTGATTTAGCTATTTTTTCATTACATTTAGCAGGTATCTCCTCAATTTTAGGAGCTGTAAATTTTATCACAACAGTAATTAATATACGATCAGAAGGAATTTCTTTTGACCGTATACCACTATTTGTTTGATCTGTAATTATTACAGCTGTTTTACTGTTACTTTCTCTTCCTGTATTAGCAGGAGCAATTACTATACTTTTAACAGACCGAAATTTAAATACTTCTTTCTTTGACCCCGCTGGAGGAGGAGACCCTATTTTATACCAACACTTATTTTGATTTTTTGGTCACCCTGAAGTTTA
KNWR:Ento:10847	KNWR:Ento:10847	M02696:121:000000000-AP85G:1:1111:8838:21806 1:N:0:228	3	CNGLF1148-13	CNGLF1148-13	97.6	Insecta	Diptera	Empididae	Empididae gen. undet.	Empididae sp. BOLD:AAF9792	BOLD:AAF9792	BOLD:AAF9792	British Columbia	GGAACTGGTTGAACTGTATACCCCCCTCTTTCATCTGGAATTGCTCATGGAGGAGCTTCTGTAGATTTAGCAATTTTTTCACTTCATTTAGCAGGTATTTCTTCTATTTTAGGGGCCGTAAATTTTATTACAACAGTAATTAATATACGAACCCCAGGAATTTCATTTGACCGCATACCTCTATTTGTTTGATCAGTAGTAATTACAGCTATTCTATTATTACTTTCTTTACCTGTATTAGCTGGAGCTATTACAATATTATTAACAGATCGAAATTTAAATACTTCATTTTTTGATCCGGCAGGAGGAGGAGACCCTATTTTATATCAACATTTATTTTGATTTTTTGGTCACCCTGAAGTTTA
KNWR:Ento:10847	KNWR:Ento:10847	M02696:121:000000000-AP85G:1:2110:14423:22231 1:N:0:228	4390	BBDCP123-10	BBDCP123-10	95.3	Insecta	Diptera	Fanniidae	Fannia	Fannia aethiops	BOLD:AAM6399	BOLD:AAM6399	British Columbia	GGTACAGGTTGAACAGTTTATCCCCCCACTATCATCTAACATCGCTCACGGAGGAGCATCCGTAGATCTAGCTATTTTTTCTTTACATTTAGCTGGAATTTCATCAATTTTAGGAGCTGTGAATTTTATCACAACTGTAATTAATATACGAGCTACAGGAATTACATTTGACCGAATACCTTTATTTGTTTGATCTGTAGTAATTACAGCATTATTATTACTTTTATCTTTACCTGTATTAGCCGGAGCTATTACTATATTATTAACAGATCGAAATATAAATACATCCTTTTTTGACCCTGCAGGAGGAGGAGATCCTATTTTATATCAACATTTATTTTGATTTTTTGGTCACCCTGAAGTTTA
KNWR:Ento:10847	KNWR:Ento:10847	M02696:121:000000000-AP85G:1:2112:7372:17283 1:N:0:228	141	DKNWR024-11	DKNWR024-11	96.2	Insecta	Diptera	Lauxaniidae	Lauxania	Lauxania shewelli	BOLD:AAH3531	BOLD:AAH3531	Alaska	GGTACAGGTTGAACAGTTTATCCTCCGCTATCTTCTGGAATCGCTCATGGAGGTGCCTCAGTTGACTTAGCAATTTTTAGACTTCATTTAGCCGGAGTATCTTCAATTTTAGGAGCCGTAAATTTTATTACTACTGTAATCAATATACGATCTACTGGAATTACTTTCGACCGAATACCTTTATTTGTATGATCAGTAGTAATTACAGCTCTTTTATTACTTTTGTCTCTACCTGTATTAGCTGGAGCCATTACAATGTTACTAACTGATCGAAATTTAAACACCTCATTCTTTGACCCATCTGGAGGATGAGACCCTATTCTTTATCAACCTTTAGTTTGATTTTTTTGGTCACCCTGAAGTTTA
KNWR:Ento:10847	KNWR:Ento:10847	M02696:121:000000000-AP85G:1:1109:8447:10755 1:N:0:228	454	MFAI008-11	MFAI008-11	97.7	Insecta	Diptera	Muscidae	Coenosia	Coenosia impunctata	BOLD:AAQ0758	BOLD:AAQ0758	Alaska	GGAACTGGATGAACTGTATATCCTCCTTTATCATCTAATATTGCTCATGGAGGAGCTTCTGTAGATTTAGCTATTTTTTCACTTCATTTAGCTGGAATTTCTTCTATTCTAGGAGCTGTAAATTTTATTACTACTGTAATTAATATACGATCAACAGGAATTACATTTGATCGAATACCTTTATTTGTTTGATCTGTAGTTATTACAGCTTTATTATTATTATTATCATTACCCGTATTAGCTGGAGCAATTACAATATTATTAACAGATCGAAACTTAAATACGTCTTTTTTTGACCCTGCAGGAAGAGGAGATCCAATTTTATACCAACATTTATTTTGATTTTTTGGTCACCCGGAAGTTTAC
KNWR:Ento:10847	KNWR:Ento:10847	M02696:121:000000000-AP85G:1:1109:6861:13109 1:N:0:228	1	BBDCN415-10	BBDCN415-10	98.2	Insecta	Diptera	Phoridae	Megaselia	Megaselia diversa	BOLD:ACX1594	BOLD:ACX1594	British Columbia	GGTACTGGATGAACTGTATATCCTCCTCTTTCATCTAGAATCGCTCATAGTGGAGCTTCAGTAGATTTAGCAATTTTTTCACTTCATTTAGCTGGAATTTCTTCAATTTTAGGAGCTGTAAATTTTATTACTACTATCATTAATATACGATCATCAGGAATTACTTTTGATCGAATACCTTTATTTGTATGATCAGTAGGAATTACTGCTCTATTACTTTTACTTTCACTTCCTGTTTTAGCTGGTGCTATCACAATACTATTAACTGATCGAAATTTCAATACTTCTTTCTTTGACCCAGCTGGTGGAGGAGATCCAATTTTATACCAACATTTATTTTGATTTTTTGGTCACCCTGAAGTTTA
KNWR:Ento:10847	KNWR:Ento:10847	M02696:121:000000000-AP85G:1:2105:19678:19155 1:N:0:228	170	PNAJS108-09	PNAJS108-09	98.5	Insecta	Diptera	Pipunculidae	Pipunculus	Pipunculus hertzogi	BOLD:AAE4793	BOLD:AAE4793	Alaska	GGTACTGGTTGAACTGTTTACCCCCCCCCTATCTTCAAACATTGCACACGGGGGAGCTTCAGTAGATTTAGCAATCTTTTCACTTCACTTAGCCGGAATTTCATCAATTCTTGGTGCTGTAAACTTTATTACAACTGTAATTAATATGCGATCAACAGGAATATCATTTGATCGAATACCTTTATTTGTGTGAGCTGTAGTAATTACAGCCCTTTTATTACTTTTGTCTCTGCCAGTTCTAGCAGGAGCTATTACAATACTTTTAACTGACCGAAATTTTAATACATCATTCTTTGACCCAGCAGGGGGTGGTGATCCTATCTTGTACCAACACCTATTCTGATTTTTTGGTCACCCTGAAGTTTA
KNWR:Ento:10847	KNWR:Ento:10847	M02696:121:000000000-AP85G:1:1115:26649:13460 1:N:0:228	2	DKNWR029-11	DKNWR029-11	98.5	Insecta	Diptera	Rhagionidae	Symphoromyia	Symphoromyia sp. BOLD:AAP6399	BOLD:AAP6399	BOLD:AAP6399	Alaska	GGTACAGGTTGAACTGTATATCCCCCCCTATCTGCTAGAATTGCCCATGCTGGCGCTTCAGTGGATTTAGCAATTTTTTCTCTACATTTAGCAGGAATTTCTTCTATTTTAGGAGCAGTAAATTTTATTACAACAGTAATTAATATACGATCAACAGGTATTTCATTTGATCGAATACCTTTATTCGTATGAGCTGTTGTAATTACAGCTATTCTTTTATTGTTATCTTTACCTGTATTAGCGGGAGCTATTACAATACTATTAACAGATCGAAATTTAAATACTTCATTCTTTGATCCGGCAGGAGGGGGAGACCCTATTTTATATCAACATTTATTTTGATTTTTTGGTCACCCTGAAGTTTA
KNWR:Ento:10847	KNWR:Ento:10847	M02696:121:000000000-AP85G:1:1118:19451:2827 1:N:0:228	15335	BBDCN994-10	BBDCN994-10	94.7	Insecta	Diptera	Scathophagidae	Scathophaga	Scathophaga furcata	BOLD:ACX4405	BOLD:ACX4405	British Columbia	GGTACTGGATGAACTGTATATCCTCCTTTATCTTCAAATATTGCTCACGGAGGAGCTTCTGTTGATTTAGCAATTTTTTCTCTTCATTTAGCTGGAATTTCATCTATTTTAGGGGCTGTAAATTTTATCACAACTGTAATTAATATACGATCAACAGGAATTACTTTCGATCGAATACCTTTATTTGTATGATCTGTAGTAATTACAGCTTTATTGCTTCTTTTATCTTTACCAGTTTTAGCCGGAGCTATTACTATATTATTGACTGATCGAAATCGTAATACATCATTTTTTGACCCTGCAGGAGGAGGAGATCCAATTTTATACCAACAGTTATTTTGATTTTTTGGTCACCCTGAAGTTAAGGTTA
KNWR:Ento:10847	KNWR:Ento:10847	M02696:121:000000000-AP85G:1:1118:25768:20068 1:N:0:228	12	BBDCP127-10	BBDCP127-10	90.9	Insecta	Diptera	Scathophagidae	Scathophaga	Scathophaga furcata	BOLD:ACX4405	BOLD:ACX4405	British Columbia	GGAACAGGATGAACAGTTTACCCCCCTTTATCTTCAAATATTGCTCACGGGGGAGCTTCTGTTGATTTAGCAATTTTTTCTCTTCATTTAGCTGGAATTTCATCTATTTTAGGGGCTGTAAATTTTATCACAACTGTAATTAATATACGATCAACAGGAATTACTTTCGATCGAATACCTTTATTTGTATGATCAGTAGTAATTACAGCTCTTTTATTACTTTTATCTCTACCCGTATTAGCTGGAGCCATTATAATATTACTAACTGATCGAAATTTAAACACCTCATTCTTTGACCCAGCTGGAGGAGGAGACCCTATTCTTTATCAACATTTATTTTGATTTTTTGGTCACCCTGAAGTTTA
KNWR:Ento:10847	KNWR:Ento:10847	M02696:121:000000000-AP85G:1:1101:12298:5339 1:N:0:228	9	BBDCN492-10	BBDCN492-10	95.6	Insecta	Diptera	Sciaridae	Cratyna	Cratyna sp. BOLD:AAP6470	BOLD:AAP6470	BOLD:AAP6470	British Columbia	GGAACAGGTTGAACAGTTTATCCCCCACTATCTTCTACCTTATCTCATTCAGGGGCCTCTGTAGATTTATCAATTTTTTCACTTCATTTAGCTGGGATTTCTTCAATTTTAGGAGCCGTAAATTTTATTTCAACTATCATTAATATACGAACCCCTGGAATACTTTTTGATAAAATGCCTTTATTTGTTTGACCAGTTTTTATTACAGCTATTTTATTATTATTATCCTTACCAGTTCTAGCAGGCGCTATTACTATACTATTAACAGATCGAAATTTGAATACTTCTTTTTTTGACCCAGCAGGAGGGGGGGACCCTATTCTATATCAACATTTATTTTGATTTTTTGGTCACCCTGAAGTTTA
KNWR:Ento:10847	KNWR:Ento:10847	M02696:121:000000000-AP85G:1:2107:12228:24668 1:N:0:228	1017	BBDCN497-10	BBDCN497-10	92.3	Insecta	Diptera	Sepsidae	Sepsis	Sepsis neocynipsea	BOLD:ABY4960	BOLD:ABY4960	British Columbia	GGTACTGGTTGAACAGTTTACCCCCCACTATCTTCTGGAATTGCCCATACAGGAGGTTCTGTTGATTTAGCTATTTTTTCATTACATTTAGCAGGTATCTCCTCAATTTTAGGAGCTGTAAATTTTATTACAACAGTTATTAATATACGATCTACAGGAATTACATTTGATCGAATACCTTTATTTGTATGAGCTGTTGTTATTACTGCACTTCTTTTACTTTTATCATTACCTGTTTTAGCAGGAGCAATTACAATATTATTAACTGATCGAAATTTAAATACCTCATTTTTTGACCCTGCTGGAGGTGGTGACCCAATTCTTTACCAACATTTATTTTGATTTTTTTGGTCACCCTGAAGTTTA
KNWR:Ento:10847	KNWR:Ento:10847	M02696:121:000000000-AP85G:1:2114:24728:6394 1:N:0:228	278	BBDCN497-10	BBDCN497-10	92.4	Insecta	Diptera	Sepsidae	Sepsis	Sepsis neocynipsea	BOLD:ABY4960	BOLD:ABY4960	British Columbia	GGTACAGGTTGAACTGTTTATCCCCCTTTATCTTCAGGTATTGCTCATGGAGGAGCTTCAGTTGATTTAGCAATTTTTTCTCTCCATTTAGCAGGAATTTCTTCTATTTTAGGAGCTGTAAATTTTATTACAACAGTTATTAATATACGATCTACAGGAATTACATTTGATCGAATACCTTTATTTGTATGAGCTGTTGTTATTACTGCACTTCTTTTACTTTTACTTTCTCTTCCTGTATTAGCAGGAGCAATTACTATACTTTTAACAGACCGAAATTTAAATACTTCTTTCTTTGACCCCGCTGGAGGAGGAGACCCTATTTTATATCAACATTTATTTTGATTTTTTGGTCACCCTGAAGTTTA
KNWR:Ento:10847	KNWR:Ento:10847	M02696:121:000000000-AP85G:1:1118:28425:13077 1:N:0:228	31	BBDCN497-10	BBDCN497-10	93.2	Insecta	Diptera	Sepsidae	Sepsis	Sepsis neocynipsea	BOLD:ABY4960	BOLD:ABY4960	British Columbia	GGAACTGGATGAACAGTTTACCCTCCTTTTATCTTCAGGTATTGCTCATGGAAGAGCTTCAGTTGATGTAGCAATTTTTTCTCTACATTTAGCAGGAATTTCTTCTATTTTAGGGGCTGTAAATTTTATCACAACAATTATAATTATACGATCTACAGGAATTACATTTGATCGAATACCTTTATTTGTATGAGCTGTTGTTATTACTGCACACCTTTTACTTTTGTCACTACCTCTTTTAGCAGGAGCTATTACAATACTATTAACTGATCGAAATTTGAATACCTCATTTTTTGACCCTGCTGGAGGTGGAGACACAATTCTTTATCAACAATTATTTTGATTTTTTGGTCACCCTGAAGTTTA
KNWR:Ento:10847	KNWR:Ento:10847	M02696:121:000000000-AP85G:1:1119:26760:5976 1:N:0:228	1	BBDCN497-10	BBDCN497-10	90.3	Insecta	Diptera	Sepsidae	Sepsis	Sepsis neocynipsea	BOLD:ABY4960	BOLD:ABY4960	British Columbia	GGAACTGGATGAACTGTTTATCCTCCTTTATCTTCAGGTATTGCTCATGTAGGAGCTTCAGTTGATTTAGCCATGGTTTCGCTCCCTTTAGCAGGCCTTTCTTTTCGTTTCGTAGCTGTCAATTTTATTACCCCCGTTATTAATATCCGCTCTCCCGGAATTACATTTGCTCGCATCCCTTTATTTGTATGAGCTGTTGTTATTACTGCACTTCTTTTACTTTTATCATTACCTGTTTTAGCAGGAGCAATTACAATATTATTAACTGATCGAAATTTAAATACCTCATTTTTTGACCCTGCTGGAGGTGGTGACCCAATTCTTTACCAACATTTATTCTGAGTGGGCGGGCCGACTGAAGTTTA
KNWR:Ento:10847	KNWR:Ento:10847	M02696:121:000000000-AP85G:1:1105:26900:9095 1:N:0:228	2	RDBAB1153-10	RDBAB1153-10	98.8	Insecta	Hemiptera	Aphididae	Macrosiphum	Macrosiphum euphorbiae	BOLD:AAA6213	BOLD:AAA6213	Alaska	GGTACTGGTTGAACAGTTTATCCCCCTTTATCAAACAATATTGCACATAATAACATTTCAGTTGATTTAACTATTTTTTCTTTACATCTAGCAGGAATCTCATCAATTTTAGGAGCAATTAATTTTATTTGTACAATTCTTAATATAATACCAAACAATATAAAATTAAATCAAATTCCTCTTTTTCCTTGATCAATTTTAATTACAGCTATTTTACTAATTTTATCTTTACCAGTTTTAGCTGGTGCCATTACAATACTTTTAACTGATCGTAATTTAAATACATCATTTTTTGATCCAGCAGGAGGAGGAGATCCTATTTTATATCAACATTTATTTTGATTTTTTGGTCACCCTGAAGTTTA
KNWR:Ento:10847	KNWR:Ento:10847	M02696:121:000000000-AP85G:1:1105:16833:5725 1:N:0:228	1	CNCHF2119-12	CNCHF2119-12	98.5	Insecta	Hemiptera	Cicadellidae	Euscelis	Euscelis monodens sp. nov	BOLD:ACG7815	BOLD:ACG7815	Yukon Territory	GGAACAGGTTGAACTGTATATCCCCCTCTTTCAAGTAACATTGCCCATTCAGGAGCGAGAGTAGATTTATCTATCTTCTCTCTGCACTTGGCAGGAATTTCTTCAATTTTAGGTGCAGTAAATTTCATTTCAACTGTAATAAATATACGAACGTCAGGGATACTCTTAGACCGCACTCCCCTTTTTGTGTGATCAGTTCTTATTACTGCAATTCTACTACTTCTGTCATTACCGGTATTGGCTAGAGCCATCACCATACTCCTTACTGACCGAAATATAAACACAACATTTTTTGACCCTGCAGGTGGGGGTGACCCAATTCTCTATCAACATTTATTTTGATTTTTTGGTCACCCTGAAGTTTA
KNWR:Ento:10847	KNWR:Ento:10847	M02696:121:000000000-AP85G:1:1111:24380:20150 1:N:0:228	5235	BBHCN362-10	BBHCN362-10	94.8	Insecta	Hemiptera	Cicadellidae	Sonronius	Sonronius dahlbomi	BOLD:AAN8426	BOLD:AAN8426	British Columbia	AGACCGGGAACAGGATGAACAGTATACCCCCCTCTCTCTGGAAATATTGCTCATGCAGGTCCTAGTGTTGACATATCAATTTTTTCACTACACTTAGCAGGGGGTTCTTCTATCTTAGGAGCAGTAAATTTTATTACAACTGTAATAAATATACTACCTAGAGGTATAACCTTAGACCGAACCCCATTATTTGTATGATCTGTTTTAATTACTGCAGTCCTATTATTACTATCACTCCCAGTACTTGCTGGTGCAATTACCATACTACTCACTGATCGGAATATTAATACAACGTTCTTCGTCCCAGCTGGTGGGGGGGACCCTATCTTATACCAACATTTGTTTTGATTTTTTGGTCACCCTGAAGTTTA
KNWR:Ento:10847	KNWR:Ento:10847	M02696:121:000000000-AP85G:1:1112:12906:7567 1:N:0:228	1	CNCHA680-11	CNCHA680-11	95.4	Insecta	Hemiptera	Miridae	Lygus	Lygus sp. BOLD:ABZ1405			British Columbia	GGTACTGGTTGAACAGTATATCCTCCATTATCAGCAAATATCTCCCATAATGGAGCATCAGTAGATTTAGCAATCTTTTCACTTCATCTAGCAGGAGTAAGATCAATTTTAGGGGCAGTAAATTTTATTTCAACAATTATTAACATACGACCTATAGGAATAAATGCAGAACGAATCCCACTATTTGTATGATCAGTAGGAATCACTGCACTACTATTACTTTTATCATTACCTGTATTAGCAGGTGCCATTACTATATTATTAACAGATCGAAATTTTAATACATCATTTTTTGACCCAGCAGGAGGTGGGGATCCAATTCTATATCAACATTTATTTTGATTTTTTGGTCACCCTGAAGTTTA
KNWR:Ento:10847	KNWR:Ento:10847	M02696:121:000000000-AP85G:1:2113:16107:20812 1:N:0:228	516	UAMIC1935-14	UAMIC1935-14	91.3	Insecta	Hemiptera	Psyllidae	Craspedolepta	Craspedolepta alaskensis	BOLD:ACM1279	BOLD:ACM1279	Alaska	GGAACAGGATACAGGGTACTGGTTGAACAGTATATCCTCCACTTTCTAATAGTTCTTTCCATAGAGGATATTCAATTGATATAGCAATTTTTTCACTTCACCTAGCAGGTATTTCTTCTATCCTTGGAGCAATTAACTTTATCACAACAATTCTAAATATACGATCTTCATTGTGTGATTTAGAAAAAATACCCTTATTTGTTTGATCAGTATTAATTACTGCATTTCTTCTACTTTTAGCCCTTCCAGTGCTAGCTGGAGCAATCACTATACTTTTAACAGACCGAAATTTTAATACTTCTTTTTTTGACCCTAGAGGAGGAGGAGACCCTATTTTATACCAACATTTATTTTGATTTTTTGGTCACCCTGAAGTTTA
KNWR:Ento:10847	KNWR:Ento:10847	M02696:121:000000000-AP85G:1:1119:14616:10071 1:N:0:228	21	UAMIC645-13	UAMIC645-13	94.7	Insecta	Lepidoptera	Noctuidae	Alypia	Alypia langtoni	BOLD:AAD5114	BOLD:AAD5114	Alaska	GGAACTGGATGAACAGTATATCCCCCCACTTTCATCTATTATTGCCAATGGTGGAGGATCGTTTGATTTAGCCATCTTTTCTTTACATTTGGCAGGTATTTCATCAATTTTAGGAGCAATTAATTTTATTACAAAAATTATTAATATACGATTAAATAATTTATCCTTTGATCAAATACCTTTATTTGTATGAGCTGTTGGTATTACAGCATTTTTATTATTACTTTCACTACCAGTTTTAGCAGGAGCTATTACAATACTTTTAACAGACCGAAATTTAAATACTTCTTTCTTTGACCCCGCTGGAGGAGGAGACCCTATTTTATACCAACACTTATTTTGATTTTTTGGTCACCCTGAAGTTTA
