# Supplementary material for: Arthropod and oligochaete assemblages from grasslands of the southern Kenai Peninsula, Alaska
Source: Biodivers Data J. 2017 Jan 12;(5):e10792. doi: 10.3897/BDJ.5.e10792 (PMC5345024; doi:10.3897/BDJ.5.e10792)
Supplement: Supplementary material 5 — Read counts by species and samples [file bdj-05-e10792-s005.xlsx]

## Sheet: 2016-07-11-0940_occurrence_data
class	order	family	genus	species	BIN	KNWR:Ento:10838	KNWR:Ento:10839	KNWR:Ento:10840	KNWR:Ento:10841	KNWR:Ento:10842	KNWR:Ento:10843	KNWR:Ento:10844	KNWR:Ento:10845	KNWR:Ento:10846	KNWR:Ento:10847	total reads
Arachnida	Araneae	Thomisidae	Misumena	Misumena vatia	BOLD:AAA6275	0	0	0	0	0	0	0	25	0	0	25
Insecta	Coleoptera	Chrysomelidae	Altica	Altica tombacina	BOLD:AAG3656	0	0	10	0	0	0	0	1920	0	0	1930
Insecta	Coleoptera	Elateridae	Hypnoidus	Hypnoidus bicolor	BOLD:AAH2367	4149	0	0	0	0	0	0	0	0	0	4149
Insecta	Diptera	Anthomyiidae	Anthomyiidae gen. undet.	Anthomyiidae sp. BOLD:AAG2469	BOLD:AAG2469	0	0	0	0	0	0	0	305	4012	5338	9655
Insecta	Diptera	Anthomyiidae	Botanophila	Botanophila relativa	BOLD:ACG5832	0	0	0	235	0	0	0	0	0	0	235
Insecta	Diptera	Anthomyiidae	Botanophila	Botanophila rubrigena	BOLD:ABX5204	0	0	0	0	137	0	0	0	0	0	137
Insecta	Diptera	Anthomyiidae	Delia	Delia echinata	BOLD:ACT6183	0	0	0	0	2351	0	0	0	0	0	2351
Insecta	Diptera	Anthomyiidae	Hylemya	Hylemya variata	BOLD:AAG2478	0	10959	471	0	1281	0	0	0	0	9	12720
Insecta	Diptera	Anthomyiidae	Paradelia	Paradelia brunneonigra	BOLD:ACB1112	0	0	16	0	0	0	0	0	0	0	16
Insecta	Diptera	Anthomyiidae	Pegomya	Pegomya sp. BOLD:AAG2506	BOLD:AAG2506	0	320	0	0	0	0	0	0	0	0	320
Insecta	Diptera	Anthomyzidae	Anthomyza	Anthomyza sp. BOLD:AAL8100	BOLD:AAL8100	10	0	121	0	0	0	0	0	0	0	131
Insecta	Diptera	Bibionidae	Bibionidae gen. undet.	Bibionidae sp. BOLD:ACG6252	BOLD:ACG6252	0	0	0	0	0	0	42416	45	0	0	42461
Insecta	Diptera	Chironomidae	Metriocnemus	Metriocnemus sp. BOLD:ACB8808	BOLD:ACB8808	0	0	0	0	0	0	0	6	0	0	6
Insecta	Diptera	Chironomidae	Smittia	Smittia sp. 16ES	BOLD:AAB0375	0	0	0	0	1032	0	0	0	0	0	1032
Insecta	Diptera	Chironomidae	Smittia	Smittia sp. ES12	BOLD:AAB0377	0	0	0	0	0	0	0	5	0	0	5
Insecta	Diptera	Culicidae	Aedes	Aedes pullatus	BOLD:AAM4536	0	0	0	0	26	0	0	0	0	0	26
Insecta	Diptera	Empididae	Empididae gen. undet.	Empididae sp. BOLD:AAF9792	BOLD:AAF9792	0	0	229	0	0	0	561	5505	0	0	6295
Insecta	Diptera	Fanniidae	Fannia	Fannia aethiops	BOLD:AAM6399	1291	8063	0	0	0	20681	0	4139	0	4390	38564
Insecta	Diptera	Fanniidae	Fannia	Fannia serena	BOLD:AAG6901	0	0	0	0	0	0	0	6563	0	0	6563
Insecta	Diptera	Heleomyzidae	Suillia	Suillia convergens	BOLD:AAV8347	0	0	0	0	3448	0	0	0	0	0	3448
Insecta	Diptera	Hybotidae	Euthyneura	Euthyneura sp. BOLD:AAF9859	BOLD:AAF9859	0	0	0	0	237	0	0	0	0	0	237
Insecta	Diptera	Lauxaniidae	Lauxania	Lauxania shewelli	BOLD:AAH3531	160	0	0	0	0	293	0	0	13	141	607
Insecta	Diptera	Muscidae	Coenosia	Coenosia impunctata	BOLD:AAQ0758	9	18	0	0	23	37	0	0	0	454	541
Insecta	Diptera	Muscidae	Hydrotaea	Hydrotaea militaris	BOLD:AAG1771	0	0	0	48	102	353	0	0	0	0	503
Insecta	Diptera	Muscidae	Muscidae gen. undet.	Muscidae sp. BOLD:ACL9946	BOLD:ACL9946	0	0	0	0	0	10	0	0	0	0	10
Insecta	Diptera	Muscidae	Myospila	Myospila meditabunda	BOLD:AAD7145	0	0	0	0	0	334	0	0	0	0	334
Insecta	Diptera	Phoridae	Megaselia	Megaselia diversa	BOLD:ACX1594	0	0	44	0	0	0	0	392	0	0	436
Insecta	Diptera	Phoridae	Phoridae gen. undet.	Phoridae sp. BOLD:AAG3234	BOLD:AAG3234	0	0	0	0	323	0	0	0	0	0	323
Insecta	Diptera	Phoridae	Phoridae gen. undet.	Phoridae sp. BOLD:AAL9069	BOLD:AAL9069	0	0	0	0	0	0	0	0	8	0	8
Insecta	Diptera	Pipunculidae	Pipunculus	Pipunculus campestris	BOLD:AAD0917	0	0	0	154	0	0	0	0	46	0	200
Insecta	Diptera	Pipunculidae	Pipunculus	Pipunculus hertzogi	BOLD:AAE4793	0	0	14	0	6	0	0	9	51	170	250
Insecta	Diptera	Pipunculidae	Tomosvaryella	Tomosvaryella sp. BOLD:AAG3766	BOLD:AAG3766	0	0	0	0	0	0	0	0	15	0	15
Insecta	Diptera	Psychodidae	Psychoda	Psychoda phalaenoides	BOLD:AAF9317	0	0	0	0	0	6	0	0	0	0	6
Insecta	Diptera	Rhagionidae	Symphoromyia	Symphoromyia sp. BOLD:AAP6399	BOLD:AAP6399	0	1675	162	521	0	0	0	0	10	0	2368
Insecta	Diptera	Scathophagidae	Scathophaga	Scathophaga furcata	BOLD:ACX4405	0	0	0	0	0	0	0	0	562	15335	15897
Insecta	Diptera	Scathophagidae	Scathophaga	Scathophaga suilla	BOLD:AAN6699	0	0	0	0	0	0	0	6	0	0	6
Insecta	Diptera	Sciaridae	Cratyna	Cratyna sp. BOLD:AAP6470	BOLD:AAP6470	0	0	0	0	0	0	0	0	0	9	9
Insecta	Diptera	Sciaridae	Sciaridae gen. undet.	Sciaridae sp. BOLD:AAH3999	BOLD:AAH3999	16	0	0	0	0	0	0	0	0	0	16
Insecta	Diptera	Sepsidae	Sepsis	Sepsis neocynipsea	BOLD:ABY4960	260	0	6	0	0	0	11	182	0	1326	1785
Insecta	Diptera	Simuliidae	Simulium	Simulium arcticum complex	BOLD:AAA8954	0	0	0	0	0	0	0	244	0	0	244
Insecta	Diptera	Simuliidae	Simulium	Simulium venustum complex	BOLD:AAA4264	0	0	0	0	0	355	0	0	16	0	371
Insecta	Diptera	Syrphidae	Hiatomyia	Hiatomyia sp. BOLD:AAZ5940	BOLD:AAZ5940	0	203	0	0	0	0	0	0	0	0	203
Insecta	Hemiptera	Aphididae	Macrosiphum	Macrosiphum euphorbiae	BOLD:AAA6213	0	0	0	0	52	0	0	5	0	0	57
Insecta	Hemiptera	Cicadellidae	Balclutha	Balclutha sp. BOLD:AAG8963	BOLD:AAG8963	0	0	0	0	0	0	299	0	0	0	299
Insecta	Hemiptera	Cicadellidae	Boreotettix	Boreotettix sp.		0	0	6	0	0	0	0	0	0	0	6
Insecta	Hemiptera	Cicadellidae	Diplocolenus	Diplocolenus evansi		0	0	0	0	0	0	0	0	51	0	51
Insecta	Hemiptera	Cicadellidae	Empoasca	Empoasca luda	BOLD:AAG8683	41	0	0	0	0	0	0	0	0	0	41
Insecta	Hemiptera	Cicadellidae	Euscelis	Euscelis monodens sp. nov	BOLD:ACG7815	34487	0	42155	13900	5	0	2155	0	0	0	92702
Insecta	Hemiptera	Cicadellidae	Idiocerus	Idiocerus sp. BOLD:ACB0208	BOLD:ACB0208	63	0	0	0	0	1481	0	0	0	0	1544
Insecta	Hemiptera	Cicadellidae	Latalus	Latalus tatraensis		0	0	0	0	63	0	0	0	0	0	63
Insecta	Hemiptera	Cicadellidae	Limotettix	Limotettix dasidus	BOLD:AAG8684	139	0	0	0	0	0	0	0	0	0	139
Insecta	Hemiptera	Cicadellidae	Sonronius	Sonronius dahlbomi	BOLD:AAN8426	245	14080	0	7672	32171	1635	0	16845	32366	5235	110249
Insecta	Hemiptera	Cicadellidae	Twiningia	Twiningia fasciata		0	0	0	0	0	0	0	108	0	0	108
Insecta	Hemiptera	Miridae	Irbisia	Irbisia sericans	BOLD:AAZ2844	0	0	0	0	0	0	0	0	6574	0	6574
Insecta	Hemiptera	Miridae	Mecomma	Mecomma gilvipes	BOLD:AAZ6451	327	0	0	36	0	0	0	0	106	0	469
Insecta	Hemiptera	Miridae	Salignus	Salignus tahoensis	BOLD:AAF9947	23	0	0	0	0	20	0	0	0	0	43
Insecta	Hemiptera	Psyllidae	Craspedolepta	Craspedolepta alaskensis	BOLD:ACM1279	10	377	45	3500	6005	6192	0	3499	21	516	20165
Insecta	Hemiptera	Psyllidae	Craspedolepta	Craspedolepta subpunctata	BOLD:AAV0232	0	92	0	0	0	1105	0	0	2250	0	3447
Insecta	Hymenoptera	Braconidae	Microgaster	Microgaster jft23	BOLD:AAB8447	0	0	0	0	0	94	0	0	0	0	94
Insecta	Hymenoptera	Ichneumonidae	Mesochorus	Mesochorus prolatus	BOLD:ACE4725	0	0	0	0	112	0	0	0	0	0	112
Insecta	Hymenoptera	Ichneumonidae	Orthocentrinae gen. undet.	Orthocentrinae sp. BOLD:AAH1521	BOLD:AAH1521	0	0	0	0	28	0	0	0	0	0	28
Insecta	Hymenoptera	Ichneumonidae	Polysphincta	Polysphincta limata	BOLD:AAH1739	0	0	0	0	0	35	0	0	0	0	35
Insecta	Hymenoptera	Tenthredinidae	Amauronematus	Amauronematus fallax	BOLD:ABU5508	0	0	0	0	0	17	0	0	0	0	17
Insecta	Lepidoptera	Noctuidae	Alypia	Alypia langtoni	BOLD:AAD5114	0	0	0	0	0	0	0	0	0	21	21
Insecta	Lepidoptera	Plutellidae	Plutella	Plutella hyperboreella	BOLD:AAC3387	0	0	0	0	0	0	0	0	529	0	529
Insecta	Lepidoptera	Tortricidae	Argyrotaenia	Argyrotaenia occultana	BOLD:AAA2955	0	0	0	0	0	0	0	6	0	0	6
Insecta	Psocoptera	Caeciliusidae	Valenzuela	Valenzuela flavidus	BOLD:AAN8447	79	0	0	0	0	0	0	0	0	0	79
